# Supplementary material for: Synthesis of benzannelated sultams by intramolecular Pd-catalyzed arylation of tertiary sulfonamides
Source: publisher site journal article supplement (doi:10.3762/bjoc.13.187), 2017-09-12
Supplement: Additional file 1 [file 1860-5397-13-187-S1.pdf]

## Supporting Information

for

# Synthesis of benzannelated sultams by intramolecular Pd-catalyzed arylation of tertiary sulfonamides

Valentin A. Rassadin<sup>1</sup>, Mirko Scholz<sup>1</sup>, Anastasiia A. Klochkova<sup>1</sup>, Armin de Meijere<sup>\*2</sup>, Victor V. Sokolov<sup>\*1</sup>

Address: <sup>1</sup>St. Petersburg State University, 7/9 Universitetskaya nab, St. Petersburg, 199034 Russia and <sup>2</sup>Institut für Organische und Biomolekulare Chemie der Georg-August-Universität Göttingen, Tammannstrasse 2, D-37077 Göttingen, Germany.

Email: Victor V. Sokolov<sup>\*</sup> - vsokolo@mail.ru; Armin de Meijere<sup>\*</sup> - ameijer1@gwdg.de

<sup>\*</sup>Corresponding author

## Table of contents

|      |                                                                                                                                                       |     |
|------|-------------------------------------------------------------------------------------------------------------------------------------------------------|-----|
| 1    | General remarks .....                                                                                                                                 | S2  |
| 2    | Experimental procedures .....                                                                                                                         | S3  |
| 2.1. | Synthesis of methyl 2-[ <i>N</i> -(2-iodophenyl)- <i>N</i> -methylsulfamoyl]acetate ( <b>5</b> ) .....                                                | S3  |
| 2.2. | Synthesis of <i>o</i> -iodoanilines <b>1</b> .....                                                                                                    | S4  |
| 2.3. | Synthesis of <i>N</i> -PMB substituted <i>o</i> -iodoanilines .....                                                                                   | S5  |
| 2.4. | Synthesis of <i>N</i> -PMB-protected $\alpha$ -substituted methanesulfonamides .....                                                                  | S8  |
| 2.5. | General procedure for Pd-catalyzed cyclization of <i>N</i> -alkyl- <i>N</i> -arylsulfonamides ( <b>5</b> , <b>8a–g</b> ) ( <b>GP3</b> ) .....         | S14 |
| 2.6. | Synthesis of methyl 3-(4-methoxyphenyl)-1 <i>H</i> -3,4-dihydrobenzo[d][1,2]thiazine-1-carboxylate-2,2-dioxide ( <b>21</b> ) .....                    | S18 |
| 2.7. | Miscellaneous transformations .....                                                                                                                   | S19 |
| 3    | NMR spectra .....                                                                                                                                     | S22 |
| 3.1. | <sup>1</sup> H and <sup>13</sup> C NMR spectra of <i>N</i> -PMB substituted <i>o</i> -iodoanilines .....                                              | S22 |
| 3.2. | <sup>1</sup> H and <sup>13</sup> C NMR spectra of sulfonamides .....                                                                                  | S27 |
| 3.3. | <sup>1</sup> H and <sup>13</sup> C NMR spectra of sultams .....                                                                                       | S40 |
| 4    | X-ray crystallographic data .....                                                                                                                     | S53 |
| 4.1. | Structure analysis of crystal of methyl 5-chloro-1-(4-methoxybenzyl)-1,3-dihydrobenzo[c]isothiazole-3-carboxylate-2,2-dioxide ( <b>10c</b> ) .....    | S53 |
| 4.2. | Structure analysis of crystal of methyl 1-(4-methoxybenzyl)-3-(nitrooxy)-1,3-dihydrobenzo[c]isothiazole-3-carboxylate-2,2-dioxide ( <b>22</b> ) ..... | S55 |

## 1 General remarks

NMR spectra were recorded at ambient temperature with a Bruker DPX 300 instrument at 300.13 ( $^1\text{H}$ ) and 75.47 ( $^{13}\text{C}$ , DEPT-135) MHz; a Bruker Avance 400 instrument at 400.13 MHz ( $^1\text{H}$  NMR) and 100.61 MHz ( $^{13}\text{C}$  NMR, DEPT-135); Bruker Avance III 500 instrument at 125.73 MHz ( $^{13}\text{C}$  NMR and DEPT-135). Chemical shifts ( $\delta$ ) are given in ppm relative to resonances of solvents ( $^1\text{H}$ :  $\delta = 7.26$  for the residual  $\text{CHCl}_3$  peak,  $\delta = 2.50$  for the residual  $\text{DMSO}-d_5$  peak;  $^{13}\text{C}$ :  $\delta = 77.0$  for  $\text{CDCl}_3$ ,  $\delta = 39.5$  for  $\text{DMSO}-d_6$ ). Spin-spin coupling constants ( $J$ ) are given in Hz. Multiplicities of signals are described as follows: s = singlet, d = doublet, t = triplet, q = quartet, m = multiplet, br = broad. The multiplicities of signals in  $^{13}\text{C}$  NMR spectra were determined by the DEPT-135 and APT technique. Mass spectra were recorded with a Finnigan MAT 95 (EI), a Bruker MicroTOF (ESI), and an Agilent 6538 UHD instrument. Analytical TLC was performed on unmodified Merck ready-to-use plates (TLC silica gel 60 F254). Detection was achieved with a UV lamp or by development with molybdotophosphoric acid solution (5% in EtOH). Melting points were determined in capillaries with a Stuart SMP 30 apparatus.

Methyl 2-(chlorosulfonyl)acetate (**2a**),<sup>1</sup> ethyl 2-(chlorosulfonyl)propionate (**2b**),<sup>2</sup> phenylmethanesulfonyl chloride (**2c**),<sup>2</sup> 2-iodo-*N*-(4-methoxybenzyl)-4-methylaniline (**7b**),<sup>3</sup> and 4-chloro-2-iodo-*N*-(4-methoxybenzyl)aniline (**7c**)<sup>3</sup> were previously prepared in our research group. 2-Iodoaniline (**1a**), 1-iodo-4-methoxy-2-nitrobenzene, and (2-iodophenyl)methanol were purchased from ABCR GmbH. 4-Iodo-3-nitrobenzonitrile was purchased from FluoroChem Ltd. Ethyl 4-amino-3-iodobenzoate (**1e**) was kindly donated by Dr. Alexandra Kulyashova.<sup>4</sup>

### Crystal structure analyses:

Crystals suitable for X-ray diffractometry of compounds **9c** and **22** were obtained by slow evaporation of their solutions in hexane/EtOAc and EtOAc respectively.

X-ray diffraction data were collected at an Xcalibur Eos diffractometer at 100 K using Cu-K $\alpha$  ( $\lambda = 0.154184$  nm) radiation. The structures were solved by direct methods using the SHELXS and refined with the SHELXL<sup>5</sup> incorporated in the OLEX2 program package.<sup>6</sup>

<sup>1</sup> a) Rassadin, V. A.; Tomashevskiy, A. A.; Sokolov, V. V.; Poteknin, A. A. *Khimiya Geterotsiklicheskikh Soedinenii*, **2008**, 605–617, *Chem. Heterocycl. Compd.* **2008**, 44, 474–485.

<sup>2</sup> Rassadin, V. A.; Grosheva, D. S.; Arefeva, I. A.; Tomashevskiy, A. A.; Sokolov, V. V.; de Meijere, A. *Eur. J. Org. Chem.* **2012**, 2012, 5028–5037.

<sup>3</sup> Grosheva, D. S.; Rassadin, V. A.; Sokolov, V. V. *European J. Org. Chem.* **2015**, 1355–1363.

<sup>4</sup> Kulyashova, A. E.; Mikheeva, E. V.; Danilkina, N. A.; Balova, I. A. *Mendeleev Comm.* **2014**, 24, 102–104.

<sup>5</sup> G. M. Sheldrick, *Acta Crystallogr. Sect. A*. **2008**, 64, 112–122.

<sup>6</sup> Dolomanov, O. V.; Bourhis, L. J.; Gildea, R. J.; Howard, J. A. K.; Puschmann, H. *J. Appl. Cryst.*, **2009**, 42, 339–341.

## 2 Experimental procedures

### 2.1. Synthesis of methyl 2-[N-(2-iodophenyl)-N-methylsulfamoyl]acetate (**5**)

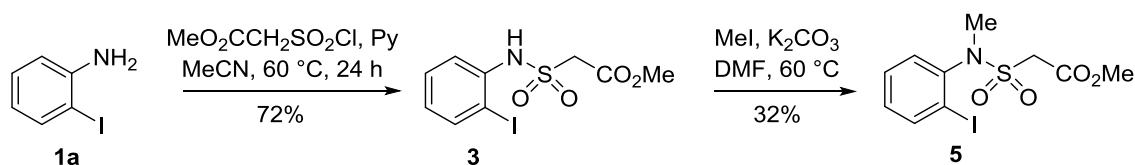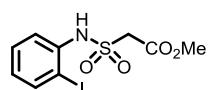

**Methyl 2-[N-(2-iodophenyl)sulfamoyl]acetate (**3**):** A solution of methyl

(chlorosulfonyl)acetate (**2a**) (5.18 g, 30.0 mmol) in anhydrous MeCN (30.0 mL) was slowly added to a stirred solution of 2-iodoaniline (**1a**) (7.23 g, 33.0 mmol) and pyridine (2.84 g, 35.9 mmol) in anhydrous MeCN (75 mL) at 10 °C within 30 min. The reaction mixture was then warmed up to 30 °C and stirred for another 1 h. Water (250 mL) was then added, the mixture was acidified with conc. HCl to pH 2, and extracted with CH<sub>2</sub>Cl<sub>2</sub> (3 × 75 mL). The combined organic fractions were washed with 5% HCl (2 × 50 mL), brine (50 mL), and dried over anhydrous Na<sub>2</sub>SO<sub>4</sub>. The solvents were removed, and the crude product was purified by recrystallization from a mixture of Et<sub>2</sub>O and hexane to give **3** (8.44 g, 72%) as a colorless solid, m.p. 99–100 °C. <sup>1</sup>H NMR (400 MHz, CDCl<sub>3</sub>): δ = 3.77 (s, 3 H, OCH<sub>3</sub>), 4.10 (s, 2 H, SO<sub>2</sub>CH<sub>2</sub>), 6.92 (td, *J* = 1.5, 7.8 Hz, 1 H, H-Ar), 7.07 (br. s, 1 H, NH), 7.36 (td, *J* = 1.5, 7.8 Hz, 1 H, H-Ar), 7.66 (dd, *J* = 1.4, 8.2 Hz, 1 H, H-Ar), 7.83 (dd, *J* = 1.4, 8.0 Hz, 1 H, H-Ar) ppm. <sup>13</sup>C NMR (100 MHz, CDCl<sub>3</sub>): δ = 53.3 (OCH<sub>3</sub>), 55.4 (SO<sub>2</sub>CH<sub>2</sub>), 91.1 (C-Ar), 121.1 (CH-Ar), 127.1 (CH-Ar), 129.8 (CH-Ar), 137.2 (C-Ar), 139.7 (CH-Ar), 163.0 (CO) ppm. HRMS (ESI), *m/z*: [M + H]<sup>+</sup> calcd. for C<sub>9</sub>H<sub>11</sub>INO<sub>4</sub>S<sup>+</sup>: 355.9448; found: 355.9443.

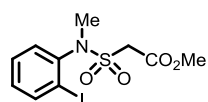

**Methyl 2-[N-(2-iodophenyl)-N-methylsulfamoyl]acetate (**5**):** A solution of MeI

(740 mg, 5.21 mmol) in DMF (30 mL) was added dropwise to a mixture of sulfonamide **3** (1.59 g, 4.48 mmol), K<sub>2</sub>CO<sub>3</sub> (1.00 g, 7.25 mmol) and DMF (30 mL) at 60 °C within 1 h. The reaction mixture was then stirred at 60 °C for 1 h, DMF was removed, and the residue was carefully dissolved in a mixture of CH<sub>2</sub>Cl<sub>2</sub> (40 mL) and 5% HCl (30 mL). The organic phase was separated and washed with 3% aq. HCl (3 × 30 mL), water (30 mL), brine (30 mL), dried over Na<sub>2</sub>SO<sub>4</sub> and concentrated. The crude product was purified by recrystallization from a mixture of Et<sub>2</sub>O and hexane to give **5** (529 mg, 32%) as a colorless solid, m.p. 93–95 °C. <sup>1</sup>H NMR (300 MHz, CDCl<sub>3</sub>): δ = 3.30 (s, 3 H, NCH<sub>3</sub>), 3.84 (s, 3 H, OCH<sub>3</sub>), 4.17 (s, 2 H, SO<sub>2</sub>CH<sub>2</sub>), 7.08 (td, *J* = 1.2, 7.8 Hz, 1 H, H-Ar), 7.41 (td, *J* = 1.2, 7.8 Hz, 1 H, H-Ar), 7.56 (dd, *J* = 1.2, 7.9 Hz, 1 H, H-Ar), 7.93 (dd, *J* = 1.2, 7.9 Hz, 1 H, H-Ar) ppm. <sup>13</sup>C NMR (75 MHz, CDCl<sub>3</sub>): δ = 39.8 (NCH<sub>3</sub>), 53.1 (OCH<sub>3</sub>), 56.9 (SO<sub>2</sub>CH<sub>2</sub>), 100.9 (C-Ar), 129.7 (CH-Ar), 130.2 (CH-Ar), 130.4 (CH-Ar), 140.5 (CH-Ar), 142.9 (C-Ar), 163.7 (CO) ppm. HRMS (ESI), *m/z*: [M + Na]<sup>+</sup> calcd. for C<sub>10</sub>H<sub>12</sub>INNaO<sub>4</sub>S<sup>+</sup>: 391.9424; found: 391.9424.

## 2.2. Synthesis of *o*-iodoanilines **1**

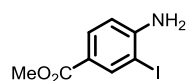

**Methyl 4-amino-3-iodobenzoate (1e):** From methyl 4-aminobenzoate (15.1 g, 99.9 mmol), iodine (15.2 g, 60 mmol), and 30% aq. H<sub>2</sub>O<sub>2</sub> (12.2 mL), compound **1e** (13.9, 50%) was obtained according to a previously published protocol<sup>7</sup> as a colorless solid, m.p. 87–89 °C, lit.<sup>8</sup> m.p. 84–87 °C.

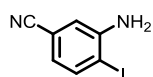

**3-Amino-4-iodobenzonitrile (1g):** From 4-iodo-3-nitrobenzonitrile (13.7 g, 50.0 mmol), iron powder (8.38 g, 150 mmol), and NH<sub>4</sub>Cl (13.4 g, 250 mmol) in 70% (v/v) aq. EtOH (150 mL), compound **1g** (10.2, 84%) was obtained according to a previously published protocol<sup>9</sup> as a colorless solid, m.p. 114–115 °C, lit.<sup>10</sup> m.p. 119–121 °C.

<sup>7</sup> Li, F. N.; Kim, N. J.; Nam, Y. H.; Kim, S. H.; Seo, S. Y.; Jeong, Y. S.; Kim, S. Y.; Park, Y. H.; Suh, Y. G. *Arch. Pharm. Res.* **2009**, *32*, 1201–1210.

<sup>8</sup> Hill, M. L.; Raphael, R. A. *Tetrahedron* **1990**, *46*, 4587–4594.

<sup>9</sup> Barton, J. W.; Lapham, D. J.; Rowe, D. J. *J. Chem. Soc. Perkin. Trans. I* **1985**, 1985, 131–133.

<sup>10</sup> Zoraghi, R.; Campbell, S.; Kim, C.; Dullaghan, E. M.; Blair, L. M.; Gillard, R. M.; Reiner, N. E.; Sperry, J. *Bioorg. Med. Chem. Lett.* **2014**, *24*, 5059–5062.

### 2.3. Synthesis of *N*-PMB substituted *o*-iodoanilines

#### General procedure for the benzylation of *o*-iodoanilines (**GP1**)

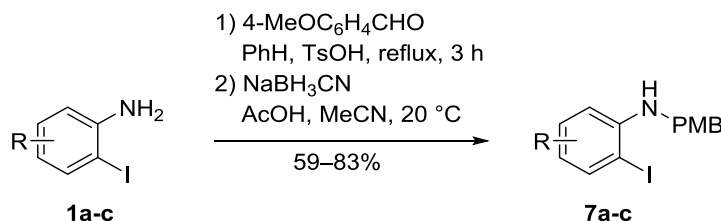

A solution of the respective aniline **1** (100 mmol), 4-methoxybenzaldehyde (13.6 g, 100 mmol), and TsOH (5 mg, 30  $\mu$ mol) in benzene (120 mL) was heated under reflux with a Dean–Stark trap for 3 h. Benzene was then removed on a rotary evaporator and the residue was dissolved in a mixture of MeCN (40 mL) and glacial AcOH (20 mL). The resulting solution was cooled to 0 °C, NaBH<sub>3</sub>CN (2.52 g, 40.1 mmol) was then added gradually at 5–10 °C within 10 min, and stirring was continued for 1 h. The reaction mixture was worked up in two different ways.

- The reaction mixture was diluted with cold water (150 mL), and the formed precipitate was filtered off, washed with water (200 mL) and dissolved in CH<sub>2</sub>Cl<sub>2</sub> (150 mL). The resulting solution was washed with water (100 mL), 5% NaOH (3  $\times$  35 mL), brine (50 mL) and dried over Na<sub>2</sub>SO<sub>4</sub>. The solvents were removed, and the crude product was purified by recrystallization from a mixture of EtOAc and hexane.
- The reaction mixture was concentrated, and the residue was taken up in CH<sub>2</sub>Cl<sub>2</sub> (150 mL). The resulting suspension was washed with water (100 mL), the 5% NaOH (3  $\times$  35 mL), brine (50 mL) and finally dried over Na<sub>2</sub>SO<sub>4</sub>. The solvents were removed, and the crude product was purified by column chromatography (eluent: hexane/EtOAc, gradient from 0 to 40% of EtOAc).

**2-Iodo-*N*-(4-methoxybenzyl)aniline (7a):** From **1a** (21.9 g, 100 mmol) and 4-methoxybenzaldehyde (13.6 g, 100 mmol), compound **7a** (28.2 g, 83%) was obtained according to **GP1a** as a colorless solid, m.p. 89–90 °C, lit.<sup>11</sup> m.p. = 89–90 °C. **<sup>1</sup>H NMR** (400 MHz, CDCl<sub>3</sub>):  $\delta$  = 3.81 (s, 3 H, OCH<sub>3</sub>), 4.33 (s, 2 H, NCH<sub>2</sub>), 4.57 (br. s, 1 H, NH), 6.45 (td,  $J$  = 1.5, 7.6 Hz, 1 H, H-Ar), 6.56 (dd,  $J$  = 1.4, 8.2 Hz, 1 H, H-Ar), 6.88–6.92 (m, 2 H, H-Ar), 7.17 (td,  $J$  = 1.5, 7.6 Hz, 1 H, H-Ar), 7.27–7.31 (m, 2 H, H-Ar), 7.68 (dd,  $J$  = 1.5, 7.8 Hz, 1 H, H-Ar) ppm. **<sup>13</sup>C NMR** (100 MHz, CDCl<sub>3</sub>):  $\delta$  = 47.8 (NCH<sub>2</sub>), 55.2 (OCH<sub>3</sub>), 85.3 (C-I), 110.9 (CH-Ar), 114.1 (2  $\times$  CH-Ar), 118.7 (CH-Ar), 128.4 (2  $\times$  CH-Ar), 129.4 (CH-Ar), 130.5 (C-Ar), 138.9 (CH-Ar), 147.1 (C-Ar),

<sup>11</sup> Hiroya, K.; Itoh, S.; Sakamoto, T. *J. Org. Chem.* **2004**, *69*, 1126–1136.

158.9 (C-Ar) ppm. **HRMS** (ESI),  $m/z$ :  $[M + Na]^+$  calcd. for  $C_{14}H_{14}INNaO^+$ : 362.0012; found: 362.0006.

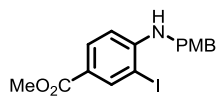

**Methyl 3-iodo-4-((4-methoxybenzyl)amino)benzoate (7d)**: From **1d** (2.50 g, 9.02 mmol) and 4-methoxybenzaldehyde (1.23 g, 9.03 mmol), compound **7d** (2.10 g, 59%) was obtained according to **GP1a** as a colorless solid, m.p. 87–88 °C. **<sup>1</sup>H NMR** (400 MHz,  $CDCl_3$ ):  $\delta$  = 3.81 (s, 3 H,  $OCH_3$ ), 3.84 (s, 3 H,  $OCH_3$ ), 4.37 (d,  $J$  = 5.3 Hz, 2 H,  $NCH_2$ ), 5.00 (t,  $J$  = 5.3 Hz, 1 H, NH), 6.51 (d,  $J$  = 8.6 Hz, 1 H, H-Ar), 6.88–6.92 (m, 2 H, H-Ar), 7.24–7.28 (m, 2 H, H-Ar), 7.85 (dd,  $J$  = 8.6, 1.9 Hz, 1 H, H-Ar), 8.36 (d,  $J$  = 1.9 Hz, 1 H, H-Ar) ppm. **<sup>13</sup>C NMR** (100 MHz,  $CDCl_3$ ):  $\delta$  = 47.5 ( $NCH_2$ ), 51.7 ( $OCH_3$ ), 55.3 ( $OCH_3$ ), 83.6 (C-I), 109.3 (CH-Ar), 114.2 (2  $\times$  CH-Ar), 120.0 (C-Ar), 128.5 (2  $\times$  CH-Ar), 129.5 (C-Ar), 131.4 (CH-Ar), 140.7 (CH-Ar), 150.3 (C-Ar), 159.1 (C-Ar), 165.9 (CO) ppm. **HRMS** (ESI),  $m/z$ :  $[M + Na]^+$  calcd. for  $C_{16}H_{16}INNaO_3^+$ : 420.0067; found: 420.0052.

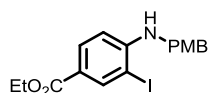

**Ethyl 3-iodo-4-((4-methoxybenzyl)amino)benzoate (7e)**: From **1e** (2.65 g, 9.10 mmol) and 4-methoxybenzaldehyde (1.24 g, 9.11 mmol), compound **7e** (2.79 g, 75%) was obtained according to **GP1b** as a colorless oil, which spontaneously crystallized in when stored a freezer,  $R_f$  = 0.46 (hexane/EtOAc, 2:1), m.p. 47–48 °C. **<sup>1</sup>H NMR** (400 MHz,  $CDCl_3$ ):  $\delta$  = 1.36 (t,  $J$  = 7.1 Hz, 3 H,  $CH_2CH_3$ ), 3.81 (s, 3 H,  $OCH_3$ ), 4.31 (q,  $J$  = 7.1 Hz, 2 H,  $OCH_2$ ), 4.38 (d,  $J$  = 5.3 Hz, 2 H,  $NCH_2$ ), 4.99 (t,  $J$  = 5.3 Hz, 1 H, NH), 6.51 (d,  $J$  = 8.6 Hz, 1 H, H-Ar), 6.88–6.92 (m, 2 H, H-Ar), 7.24–7.28 (m, 2 H, H-Ar), 7.86 (dd,  $J$  = 8.6, 1.8 Hz, 1 H, H-Ar), 8.36 (d,  $J$  = 1.8 Hz, 1 H, H-Ar) ppm. **<sup>13</sup>C NMR** (100 MHz,  $CDCl_3$ ):  $\delta$  = 14.4 ( $OCH_2CH_3$ ), 47.5 ( $NCH_2$ ), 55.3 ( $OCH_3$ ), 60.5 ( $OCH_2$ ), 83.6 (C-I), 109.3 (CH-Ar), 114.2 (2  $\times$  CH-Ar), 120.4 (C-Ar), 128.5 (2  $\times$  CH-Ar), 129.5 (C-Ar), 131.4 (CH-Ar), 140.6 (CH-Ar), 150.3 (C-Ar), 159.1 (C-Ar), 165.4 (CO) ppm. **HRMS** (ESI),  $m/z$ :  $[M + Na]^+$  calcd. for  $C_{17}H_{18}INNaO_3^+$ : 434.0224; found: 434.0209.

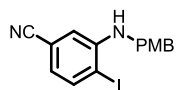

**4-Iodo-3-((4-methoxybenzyl)amino)benzonitrile (7g)**: From **1g** (2.44 g, 10.0 mmol) and 4-methoxybenzaldehyde (1.36 g, 10.0 mmol), compound **7g** (2.46 g, 68%) was obtained according to **GP1b** as a colorless solid,  $R_f$  = 0.55 (hexane/EtOAc, 2:1), m.p. 116–117 °C. **<sup>1</sup>H NMR** (400 MHz,  $CDCl_3$ ):  $\delta$  = 3.82 (s, 3 H,  $OCH_3$ ), 4.32 (d,  $J$  = 5.3 Hz, 2 H,  $NCH_2$ ), 4.77 (t,  $J$  = 5.3 Hz, 1 H, NH), 6.67–6.69 (m, 2 H, H-Ar), 6.89–6.93 (m, 2 H, H-Ar), 7.25–7.28 (m, 2 H, H-Ar), 7.75 (d,  $J$  = 8.5 Hz, 1 H, H-Ar) ppm. **<sup>13</sup>C NMR** (100 MHz,  $CDCl_3$ ):  $\delta$  = 47.6 ( $NCH_2$ ), 55.3 ( $OCH_3$ ), 90.6 (C-I), 112.6 (CH-Ar), 113.1 (C), 114.3 (2  $\times$  CH-Ar), 118.9 (C), 121.3 (CH-Ar), 128.5 (2  $\times$  CH-Ar), 129.1 (C-Ar), 139.7 (CH-Ar), 147.5 (C-Ar), 159.2 (C-Ar) ppm. **HRMS** (ESI),  $m/z$ :  $[M + Na]^+$  calcd. for  $C_{15}H_{13}IN_2NaO^+$ : 386.9965; found: 386.9947.

## Synthesis of 2-iodo-5-methoxy-*N*-(4-methoxybenzyl)aniline (**7f**)

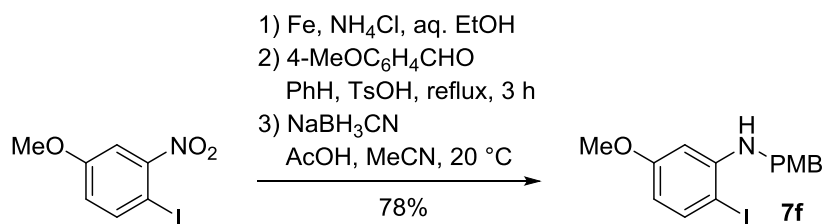

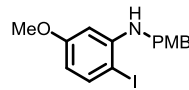 **2-Iodo-5-methoxy-*N*-(4-methoxybenzyl)aniline (**7f**):**<sup>12</sup> Iron (1.68 g, 30.0 mmol) was added in one portion to a stirred solution of NH<sub>4</sub>Cl (2.67 g, 500 mmol) in H<sub>2</sub>O (50 mL), and the resulting suspension was stirred at rt for 5 min. A solution of 1-iodo-4-methoxy-2-nitrobenzene (2.79 g, 10.0 mmol) in EtOH (100 mL) was then added, the resulting mixture was slowly warmed up to 60 °C, and stirring was continued at this temperature for 2 h. The reaction mixture was filtered through a short pad of Celite, and the filtrate was extracted with EtOAc (3 × 50 mL). The combined organic fractions were washed with brine (100 mL), dried over anhydrous Na<sub>2</sub>SO<sub>4</sub> and concentrated to give crude 2-iodo-5-methoxyaniline (2.35 g) as a brown oil, which was used in the next step without additional purification.

From this material and 4-methoxybenzaldehyde (1.28 g, 9.44 mmol), compound **7f** (2.89 g, 78% over two steps) was obtained according to **GP1b** as a colorless oil, which spontaneously crystallized when stored in a freezer, *R*<sub>f</sub> = 0.42 (hexane/EtOAc, 4:1), m.p. 55–57 °C. <sup>1</sup>H NMR (400 MHz, CDCl<sub>3</sub>): δ = 3.72 (s, 3 H, OCH<sub>3</sub>), 3.81 (s, 3 H, OCH<sub>3</sub>), 4.30 (d, *J* = 5.3 Hz, 2 H, NCH<sub>2</sub>), 4.50 (t, *J* = 5.3 Hz, 1 H, NH), 6.10 (dd, *J* = 8.6, 2.8 Hz, 1 H, H-Ar), 6.16 (d, *J* = 2.8 Hz, 1 H, H-Ar), 6.88–6.91 (m, 2 H, H-Ar), 7.27–7.31 (m, 2 H, H-Ar), 7.53 (d, *J* = 8.6 Hz, 1 H, H-Ar) ppm. <sup>13</sup>C NMR (100 MHz, CDCl<sub>3</sub>): δ = 47.9 (NCH<sub>2</sub>), 55.2 (OCH<sub>3</sub>), 55.3 (OCH<sub>3</sub>), 74.5 (C-I), 98.0 (CH-Ar), 104.1 (CH-Ar), 114.1 (2 × CH-Ar), 128.6 (2 × CH-Ar), 130.4 (C-Ar), 138.9 (CH-Ar), 148.0 (C-Ar), 159.0 (C-Ar), 161.3 (C-Ar) ppm. HRMS (ESI), *m/z*: [M + Na]<sup>+</sup> calcd. for C<sub>15</sub>H<sub>16</sub>INNaO<sub>2</sub><sup>+</sup>: 392.0118; found: 392.0116. The NMR data agree with the previously published ones.<sup>12</sup>

<sup>12</sup> Zhang, H.; Ben Hay, E.; Geib, S. J.; Curran, D. P. *Beilstein J. Org. Chem.* **2015**, *11*, 1649–1655.

## 2.4. Synthesis of *N*-PMB-protected $\alpha$ -substituted methanesulfonamides

### General procedures for the sulfonylation of *N*-PMB substituted *o*-iodoanilines (**GP2a,b**)

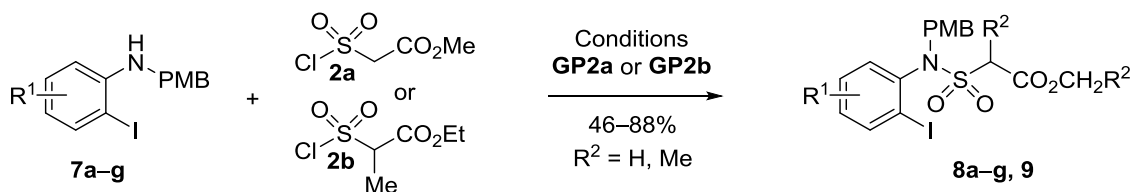

#### GP2a:

A solution of the corresponding sulfonyl chloride **2a** or **2b** (40.0 mmol) in anhydrous MeCN (5 mL) was added in one portion to a stirred solution of the respective amine **7a-c** (20.0 mmol) and pyridine (3.16 g, 40.0 mmol) in anhydrous MeCN (20 mL). The reaction mixture was then warmed up to 60 °C and stirred at this temperature for 48 h. Water (50 mL) was then added, the mixture was acidified with conc. HCl to pH 2 and extracted with CH<sub>2</sub>Cl<sub>2</sub> (3 × 75 mL). The combined organic fractions were washed with 5% aq. HCl (2 × 50 mL), brine (50 mL) and dried over anhydrous Na<sub>2</sub>SO<sub>4</sub>. The solvents were removed, and the crude product was purified by column chromatography (eluent: hexane/EtOAc, gradient from 0 to 50% of EtOAc).

#### GP2b:

A solution of methyl 2-(chlorosulfonyl)acetate (**2a**) (1.04 g, 6.00 mmol) in CH<sub>2</sub>Cl<sub>2</sub> (5 mL) was slowly added to a stirred solution of the respective amine **7d-g** (5.00 mmol) and *N,N*-diethylaniline (1.12 g, 7.50 mmol) in CH<sub>2</sub>Cl<sub>2</sub> (20 mL), and the mixture was stirred at r.t. for 20 h. The reaction mixture was washed with 5% aq. HCl (2 × 25 mL), brine (30 mL) and dried over anhydrous Na<sub>2</sub>SO<sub>4</sub>. The solvents were removed, and the crude product was purified by column chromatography (eluent: hexane/EtOAc, gradient from 0 to 100% of EtOAc).

**Methyl 2-[*N*-(2-iodophenyl)-*N*-(4-methoxybenzyl)sulfamoyl]acetate (**8a**):** From **2a** (6.90 g, 40.0 mmol) and **7a** (6.78 g, 20.0 mmol), compound **8a** (4.37 g, 46%) was obtained according to **GP2a** as a colorless solid, *R*<sub>f</sub> = 0.23 (hexane/EtOAc, 3:1), m.p. 94–95 °C. <sup>1</sup>H NMR (400 MHz, CDCl<sub>3</sub>): δ = 3.76 (s, 3 H, OCH<sub>3</sub>), 3.82 (s, 3 H, OCH<sub>3</sub>), 4.17 (AB system, δ<sub>A</sub> = 4.14, δ<sub>B</sub> = 4.21, *J* = 14.2 Hz, SO<sub>2</sub>CH<sub>2</sub>), 4.62 (d, *J* = 14.5 Hz, 1 H, NCHH'), 5.01 (d, *J* = 14.5 Hz, 1 H, NCHH'), 6.74–6.78 (m, 2 H, H-Ar), 7.00 (td, *J* = 7.7, 1.5 Hz, 1 H, H-Ar), 7.08 (dd, *J* = 7.9, 1.5 Hz, 1 H, H-Ar), 7.08–7.12 (m, 2 H, H-Ar), 7.24 (td, *J* = 7.7, 1.5 Hz, 1 H, H-Ar), 7.90 (dd, *J* = 7.9, 1.5 Hz, 1 H, H-Ar) ppm. <sup>13</sup>C NMR (100 MHz, CDCl<sub>3</sub>): δ = 53.0 (OCH<sub>3</sub>), 55.1 (OCH<sub>3</sub>), 55.4 (NCH<sub>2</sub>), 58.1 (SO<sub>2</sub>CH<sub>2</sub>), 100.9 (C-I), 113.7 (2 × CH-Ar), 127.0 (C-Ar), 128.9 (CH-Ar), 130.2 (CH-



Ar), 131.2 (2 × CH-Ar), 133.2 (CH-Ar), 140.0 (C-Ar), 140.3 (CH-Ar), 159.4 (C-Ar), 163.5 (CO) ppm.

**HRMS** (ESI),  $m/z$ :  $[M + Na]^+$  calcd. for  $C_{17}H_{18}INNaO_5S^+$ : 497.9843; found: 497.9852.

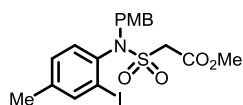

**Methyl 2-[N-(2-iodo-4-methylphenyl)-N-(4-methoxybenzyl)sulfamoyl]**

**acetate (8b)**: From **2a** (6.90 g, 40.0 mmol) and **7b** (7.06 g, 20.0 mmol), compound **8b** (5.09 g, 52%) was obtained according to **GP2a** as a colorless solid,

$R_f$  = 0.26 (hexane/EtOAc, 3:1), m.p. 90–91 °C.  **$^1H$  NMR** (300 MHz,  $CDCl_3$ ):  $\delta$  = 2.27 (s, 3 H,  $CCH_3$ ), 3.76 (s, 3 H,  $OCH_3$ ), 3.81 (s, 3 H,  $OCH_3$ ), 4.16 (AB system,  $\delta_A$  = 4.12,  $\delta_B$  = 4.19,  $J$  = 14.2 Hz,  $SO_2CH_2$ ), 4.59 (d,  $J$  = 14.5 Hz, 1 H,  $NCHH'$ ), 4.98 (d,  $J$  = 14.5 Hz, 1 H,  $NCHH'$ ), 6.74–6.79 (m, 2 H, H-Ar), 6.94 (d,  $J$  = 8.1 Hz, 1 H, H-Ar), 7.03 (dd,  $J$  = 1.7, 8.1 Hz, 1 H, H-Ar), 7.09–7.14 (m, 2 H, H-Ar), 7.70 (d,  $J$  = 1.7 Hz, 1 H, H-Ar) ppm.  **$^{13}C$  NMR** (75 MHz,  $CDCl_3$ ):  $\delta$  = 20.5 ( $CH_3$ ), 53.1 ( $OCH_3$ ), 55.1 ( $OCH_3$ ), 55.5 ( $NCH_2$ ), 58.0 ( $SO_2CH_2$ ), 100.6 (C-I), 113.7 (2 × CH-Ar), 127.2 (C-Ar), 129.7 (CH-Ar), 131.2 (2 × CH-Ar), 132.7 (CH-Ar), 137.4 (C-Ar), 140.66 (C-Ar), 140.74 (CH-Ar), 159.4 (C-Ar), 163.6 (CO) ppm. **HRMS** (ESI),  $m/z$ :  $[M + Na]^+$  calcd. for  $C_{18}H_{20}INNaO_5S^+$ : 511.9999; found: 512.0012.

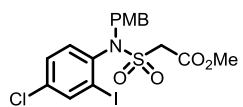

**Methyl 2-[N-(4-chloro-2-iodophenyl)-N-(4-methoxybenzyl)sulfamoyl]**

**acetate (8c)**: From **2a** (6.90 g, 40.0 mmol) and **7c** (7.47 g, 20.0 mmol), compound **8c** (6.32 g, 62%) was obtained according to **GP2a** as a colorless oil,  $R_f$  = 0.20

(hexane/EtOAc, 3:1).  **$^1H$  NMR** (400 MHz,  $CDCl_3$ ):  $\delta$  = 3.77 (s, 3 H,  $OCH_3$ ), 3.83 (s, 3 H,  $OCH_3$ ), 4.16 (AB system,  $\delta_A$  = 4.13,  $\delta_B$  = 4.19,  $J$  = 14.3 Hz,  $SO_2CH_2$ ), 4.60 (d,  $J$  = 14.5 Hz, 1 H,  $NCHH'$ ), 4.98 (d,  $J$  = 14.5 Hz, 1 H,  $NCHH'$ ), 6.76–6.79 (m, 2 H, H-Ar), 6.99 (d,  $J$  = 8.5 Hz, 1 H, H-Ar), 7.08–7.12 (m, 2 H, H-Ar), 7.21 (dd,  $J$  = 2.5, 8.5 Hz, 1 H, H-Ar), 7.87 (d,  $J$  = 2.5 Hz, 1 H, H-Ar) ppm.  **$^{13}C$  NMR** (100 MHz,  $CDCl_3$ ):  $\delta$  = 53.2 ( $OCH_3$ ), 55.2 ( $OCH_3$ ), 55.6 ( $NCH_2$ ), 58.1 ( $SO_2CH_2$ ), 101.2 (C-I), 113.8 (2 × CH-Ar), 126.7 (C-Ar), 129.2 (CH-Ar), 131.2 (2 × CH-Ar), 133.8 (CH-Ar), 135.3 (C-Ar), 138.9 (C-Ar), 139.7 (CH-Ar), 159.6 (C-Ar), 163.5 (CO) ppm. **HRMS** (ESI),  $m/z$ :  $[M + Na]^+$  calcd. for  $C_{17}H_{17}ClINNaO_5S^+$ : 531.9453; found: 531.9457.

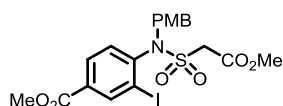

**Methyl 3-iodo-N-(4-methoxybenzyl)-N-((methoxycarbonylmethyl)sulfonyl)aminobenzoate (8d)**

: From **2a** (1.04 g, 6.00 mmol) and **7d** (1.99 g, 5.00 mmol), compound **8d** (2.05 g, 77%) was obtained according to **GP2a** as

a colorless solid,  $R_f$  = 0.23 (hexane/EtOAc, 2:1), m.p. 139–140 °C.  **$^1H$  NMR** (400 MHz,  $CDCl_3$ ):  $\delta$  = 3.76 (s, 3 H,  $OCH_3$ ), 3.83 (s, 3 H,  $OCH_3$ ), 3.90 (s, 3 H,  $OCH_3$ ), 4.18 (AB system,  $\delta_A$  = 4.15,  $\delta_B$  = 4.22,  $J$  = 14.3 Hz,  $SO_2CH_2$ ), 4.66 (d,  $J$  = 14.5 Hz, 1 H,  $NCHH'$ ), 5.02 (d,  $J$  = 14.4 Hz, 1 H,  $NCHH'$ ), 6.74–6.77 (m, 2 H, H-Ar), 7.07–7.11 (m, 2 H, H-Ar), 7.13 (d,  $J$  = 8.3 Hz, 1 H, H-Ar), 7.87 (dd,  $J$  = 8.3, 1.9 Hz, 1 H, H-Ar), 8.52 (d,  $J$  = 1.9 Hz, 1 H, H-Ar) ppm.  **$^{13}C$  NMR** (100 MHz,  $CDCl_3$ ):  $\delta$  = 52.5 ( $OCH_3$ ),

53.1 (OCH<sub>3</sub>), 55.1 (OCH<sub>3</sub>), 55.4 (NCH<sub>2</sub>), 58.3 (SO<sub>2</sub>CH<sub>2</sub>), 100.6 (C-I), 113.8 (2 × CH-Ar), 126.5 (C-Ar), 129.9 (CH-Ar), 131.1 (2 × CH-Ar), 131.5 (C-Ar), 133.2 (CH-Ar), 141.4 (CH-Ar), 144.2 (C-Ar), 159.6 (C-Ar), 163.4 (CO), 164.7 (CO) ppm. **HRMS** (ESI), *m/z*: [M + Na]<sup>+</sup> calcd. for C<sub>19</sub>H<sub>20</sub>INNaO<sub>7</sub>S<sup>+</sup>: 555.9897; found: 555.9894.

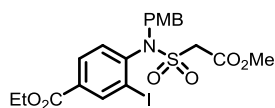

**Ethyl 3-iodo-N-(4-methoxybenzyl)-N-((methoxycarbonylmethyl)sulfonyl)aminobenzoate (8e)**: From **2a** (735 mg, 4.38 mmol) and **7e** (1.50 g, 3.65 mmol), compound **8d** (1.66 g, 83%) was obtained according to **GP2a** as a

colorless oil, *R<sub>f</sub>* = 0.29 (hexane/EtOAc, 2:1). **<sup>1</sup>H NMR** (400 MHz, CDCl<sub>3</sub>): δ = 1.37 (t, *J* = 7.1 Hz, 3 H, CH<sub>2</sub>CH<sub>3</sub>), 3.75 (s, 3 H, OCH<sub>3</sub>), 3.82 (s, 3 H, OCH<sub>3</sub>), 4.19 (AB system, δ<sub>A</sub> = 4.15, δ<sub>B</sub> = 4.22, *J* = 14.3 Hz, SO<sub>2</sub>CH<sub>2</sub>), 4.35 (q, *J* = 7.1 Hz, 2 H, OCH<sub>2</sub>), 4.66 (d, *J* = 14.5 Hz, 1 H, NCHH'), 5.00 (d, *J* = 14.5 Hz, 1 H, NCHH'), 6.73–6.77 (m, 2 H, H-Ar), 7.07–7.10 (m, 2 H, H-Ar), 7.13 (d, *J* = 8.3 Hz, 1 H, H-Ar), 7.87 (dd, *J* = 8.3, 1.9 Hz, 1 H, H-Ar), 8.51 (d, *J* = 1.9 Hz, 1 H, H-Ar) ppm. **<sup>13</sup>C NMR** (100 MHz, CDCl<sub>3</sub>): δ = 14.2 (CH<sub>2</sub>CH<sub>3</sub>), 53.1 (OCH<sub>3</sub>), 55.1 (OCH<sub>3</sub>), 55.4 (NCH<sub>2</sub>), 58.3 (SO<sub>2</sub>CH<sub>2</sub>), 61.6 (CH<sub>2</sub>CH<sub>3</sub>), 100.5 (C-I), 113.8 (2 × CH-Ar), 126.6 (C-Ar), 129.9 (CH-Ar), 131.2 (2 × CH-Ar), 131.9 (C-Ar), 133.1 (CH-Ar), 141.3 (CH-Ar), 144.1 (C-Ar), 159.6 (C-Ar), 163.4 (CO), 164.2 (CO) ppm.

**HRMS** (ESI), *m/z*: [M + Na]<sup>+</sup> calcd. for C<sub>20</sub>H<sub>22</sub>INNaO<sub>7</sub>S<sup>+</sup>: 570.0054; found: 570.0058.

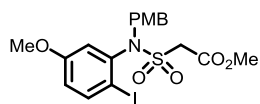

**Methyl 2-(N-(2-iodo-5-methoxyphenyl)-N-(4-methoxybenzyl)sulfamoyl) acetate (8f)**: From **2a** (1.18 g, 6.84 mmol) and **7f** (2.10 g, 5.69 mmol), compound **8d** (2.46 g, 86%) was obtained according to **GP2a** as a colorless

solid, *R<sub>f</sub>* = 0.34 (hexane/EtOAc, 2:1), m.p. 127–128 °C. **<sup>1</sup>H NMR** (400 MHz, CDCl<sub>3</sub>): δ = 3.62 (s, 3 H, OCH<sub>3</sub>), 3.77 (s, 3 H, OCH<sub>3</sub>), 3.82 (s, 3 H, OCH<sub>3</sub>), 4.18 (AB system, δ<sub>A</sub> 4.15, δ<sub>B</sub> 4.21, *J* = 14.2 Hz, SO<sub>2</sub>CH<sub>2</sub>), 4.59 (d, *J* = 14.5 Hz, 1 H, NCHH'), 5.01 (d, *J* = 14.5 Hz, 1 H, NCHH'), 6.61–6.64 (m, 2 H, H-Ar), 6.76–6.80 (m, 2 H, H-Ar), 7.11–7.15 (m, 2 H, H-Ar), 7.70 (d, *J* = 8.5 Hz, 1 H, H-Ar) ppm. **<sup>13</sup>C NMR** (100 MHz, CDCl<sub>3</sub>): δ = 53.1 (OCH<sub>3</sub>), 55.2 (OCH<sub>3</sub>), 55.5 (OCH<sub>3</sub>), 55.5 (NCH<sub>2</sub>), 58.2 (SO<sub>2</sub>CH<sub>2</sub>), 88.8 (C-I), 113.7 (2 × CH-Ar), 117.1 (CH-Ar), 119.1 (CH-Ar), 127.1 (C-Ar), 131.2 (2 × CH-Ar), 140.2 (CH-Ar), 140.9 (C-Ar), 159.5 (C-Ar), 160.1 (C-Ar), 163.6 (CO) ppm. **HRMS** (ESI), *m/z*: [M + Na]<sup>+</sup> calcd. for C<sub>18</sub>H<sub>20</sub>INNaO<sub>6</sub>S<sup>+</sup>: 527.9948; found: 527.9950.

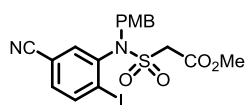

**Methyl 2-(N-(5-cyano-2-iodophenyl)-N-(4-methoxybenzyl)sulfamoyl) acetate (8g)**: From **2a** (1.05 g, 6.08 mmol) and **7g** (1.85 g, 5.08 mmol), compound **8g** (2.23 g, 88%) was obtained according to **GP2a** as a colorless solid, *R<sub>f</sub>* = 0.32

(hexane/EtOAc, 2:1), m.p. 133–134 °C. **<sup>1</sup>H NMR** (400 MHz, CDCl<sub>3</sub>): δ = 3.77 (s, 3 H, OCH<sub>3</sub>), 3.83 (s, 3 H, OCH<sub>3</sub>), 4.17 (AB system, δ<sub>A</sub> = 4.15, δ<sub>B</sub> = 4.19, *J* = 14.4 Hz, SO<sub>2</sub>CH<sub>2</sub>), 4.66 (d, *J* = 14.4 Hz, 1 H, NCHH'), 4.96 (d, *J* = 14.4 Hz, 1 H, NCHH'), 6.76–6.80 (m, 2 H, H-Ar), 7.07–7.10 (m, 2 H, H-Ar),

7.24 (dd,  $J = 8.2, 1.8$  Hz, 1 H, H-Ar), 7.36 (d,  $J = 1.8$  Hz, 1 H, H-Ar), 8.00 (d,  $J = 8.2$  Hz, 1 H, H-Ar) ppm.  **$^{13}\text{C}$  NMR** (100 MHz,  $\text{CDCl}_3$ ):  $\delta = 53.3$  ( $\text{OCH}_3$ ), 55.2 ( $\text{OCH}_3$ ), 55.6 ( $\text{NCH}_2$ ), 58.2 ( $\text{SO}_2\text{CH}_2$ ), 108.2 (C-I), 113.0 (C), 114.0 ( $2 \times \text{CH-Ar}$ ), 117.0 (CN), 126.0 (C), 131.1 ( $2 \times \text{CH-Ar}$ ), 132.6 (CH-Ar), 136.0 (CH-Ar), 141.5 (CH-Ar), 141.8 (C-Ar), 159.8 (C-Ar), 163.3 (CO) ppm. **HRMS** (ESI),  $m/z$ :  $[\text{M} + \text{Na}]^+$  calcd. for  $\text{C}_{18}\text{H}_{17}\text{IN}_2\text{NaO}_5\text{S}^+$ : 522.9795; found: 522.9818.

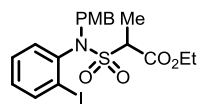

**Ethyl 2-[N-(2-iodophenyl)-N-(4-methoxybenzyl)sulfamoyl]propanoate (9a):**

From **2b** (8.02 g, 40.0 mmol) and **7a** (6.78 g, 20.0 mmol), compound **9a** (5.64 g, 56%) was obtained according to **GP2a** as a pale yellow oil,  $R_f = 0.20$  (hexane/EtOAc, 3:1). The compound exhibited two sets of signals in its  $^1\text{H}$  and  $^{13}\text{C}$  NMR spectra. *Major diastereomer:*  **$^1\text{H}$  NMR** (300 MHz,  $\text{CDCl}_3$ ):  $\delta = 1.31$  (t,  $J = 7.1$  Hz, 3 H,  $\text{CH}_2\text{CH}_3$ ), 1.79 (d,  $J = 7.1$  Hz, 3 H,  $\text{CHCH}_3$ ), 3.75 (s, 3 H,  $\text{OCH}_3$ ), 4.11–4.31 (m, 3 H,  $\text{CHCH}_3 + \text{CH}_2\text{CH}_3$ ), 4.68 (d,  $J = 14.2$  Hz, 1 H,  $\text{NCHH}'$ ), 4.87 (d,  $J = 14.2$  Hz, 1 H,  $\text{NCHH}''$ ), 6.71–6.76 (m, 2 H, H-Ar), 6.92–7.26 (m, 5 H, H-Ar), 7.88 (d,  $J = 7.9$  Hz, 1 H, H-Ar) ppm.  **$^{13}\text{C}$  NMR** (75 MHz,  $\text{CDCl}_3$ ):  $\delta = 13.74$  ( $\text{CH}_2\text{CH}_3$ ), 13.93 ( $\text{CHCH}_3$ ), 55.13 ( $\text{OCH}_3$ ), 56.18 ( $\text{OCH}_2$ ), 62.26 ( $\text{NCH}_2$ ), 63.49 ( $\text{CHCH}_3$ ), 101.02 (C-I), 113.56 ( $2 \times \text{CH-Ar}$ ), 127.12 (C-Ar), 128.82 (CH-Ar), 130.05 (CH-Ar), 131.30 ( $2 \times \text{CH-Ar}$ ), 133.71 (CH-Ar), 140.20 (CH-Ar), 140.35 (C-Ar), 159.43 (C-Ar), 166.50 (CO) ppm. *Minor diastereomer:*  **$^1\text{H}$  NMR** (300 MHz,  $\text{CDCl}_3$ ):  $\delta = 1.33$  (t,  $J = 7.1$  Hz, 3 H,  $\text{CH}_2\text{CH}_3$ ), 1.64 (d,  $J = 7.1$  Hz, 3 H,  $\text{CHCH}_3$ ), 3.75 (s, 3 H,  $\text{OCH}_3$ ), 4.21–4.31 (m, 3 H,  $\text{CHCH}_3 + \text{CH}_2\text{CH}_3$ ), 4.59 (d,  $J = 14.5$  Hz, 1 H,  $\text{NCHH}'$ ), 5.06 (d,  $J = 14.5$  Hz, 1 H,  $\text{NCHH}''$ ), 6.71–6.76 (m, 2 H, H-Ar), 6.92–7.26 (m, 5 H, H-Ar), 7.88 (d,  $J = 7.9$  Hz, 1 H, H-Ar) ppm.  **$^{13}\text{C}$  NMR** (75 MHz,  $\text{CDCl}_3$ ):  $\delta = 13.77$  ( $\text{CH}_2\text{CH}_3$ ), 13.99 ( $\text{CHCH}_3$ ), 55.13 ( $\text{OCH}_3$ ), 55.28 ( $\text{OCH}_2$ ), 62.15 ( $\text{NCH}_2$ ), 64.69 ( $\text{CHCH}_3$ ), 100.20 (C-I), 113.56 ( $2 \times \text{CH-Ar}$ ), 127.24 (C-Ar), 128.49 (CH-Ar), 129.89 (CH-Ar), 131.22 ( $2 \times \text{CH-Ar}$ ), 134.31 (CH-Ar), 140.01 (CH-Ar), 140.35 (C-Ar), 159.34 (C-Ar), 166.89 (CO) ppm. **HRMS** (ESI),  $m/z$ :  $[\text{M} + \text{H}]^+$  calcd. for  $\text{C}_{19}\text{H}_{23}\text{INO}_5\text{S}^+$ : 504.0336; found: 504.0327.

## Synthesis of *N*-(2-iodophenyl)-*N*-(4-methoxybenzyl)-1-phenylmethanesulfonamide (**12**)

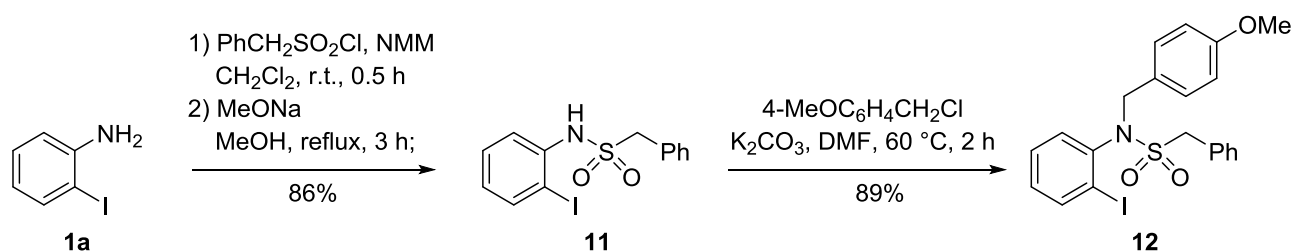

***N*-(2-Iodophenyl)-1-phenylmethanesulfonamide (**11**):** A solution of  $\alpha$ -toluenesulfonyl chloride (19.1 g, 100 mmol) in  $\text{CH}_2\text{Cl}_2$  (50 mL) was added in one portion to a stirred solution of 2-iodoaniline (11.0 g, 50.2 mmol) and *N*-methylmorpholine (10.1 g, 100 mmol) in  $\text{CH}_2\text{Cl}_2$  (100 mL) at rt, and the resulting solution was stirred at rt for 1 h. The reaction mixture was then diluted with  $\text{CH}_2\text{Cl}_2$  (100 mL), washed with 5% aq. HCl (3  $\times$  50 mL), water (50 mL), dried over anhydrous  $\text{Na}_2\text{SO}_4$  and concentrated. The residue was dissolved in MeOH (50 mL), MeONa (16.2 g, 300 mmol) was then added in one portion, and the mixture was stirred under reflux for 3 h. The solvents were removed, and the residue was dissolved in a mixture of  $\text{CH}_2\text{Cl}_2$  (100 mL) and water (50 mL). The mixture was neutralized with 15% aq. HCl, the organic phase was separated, washed with water (2  $\times$  50 mL), brine (30 mL), dried over anhydrous  $\text{Na}_2\text{SO}_4$  and concentrated on a rotary evaporator. The crude product was purified by recrystallization from hexane/EtOAc to give **11** (16.1 g, 86%) as a colorless solid, m.p. 83–84 °C. <sup>1</sup>H NMR (300 MHz,  $\text{CDCl}_3$ ):  $\delta$  = 4.37 (s, 2 H,  $\text{CH}_2$ ), 6.58 (br. s, 1 H, NH), 6.87 (td,  $J$  = 1.5, 7.7 Hz, 1 H, H-Ar), 7.20–7.24 (m, 2 H, H-Ar), 7.30–7.36 (m, 4 H, H-Ar), 7.64 (dd,  $J$  = 1.5, 8.2 Hz, 1 H, H-Ar), 7.79 (dd,  $J$  = 1.5, 8.0 Hz, 1 H, H-Ar) ppm. <sup>13</sup>C NMR (75 MHz,  $\text{CDCl}_3$ ):  $\delta$  = 58.1 ( $\text{SO}_2\text{CH}_2$ ), 90.2 (C-I), 119.4 (CH-Ar), 126.1 (CH-Ar), 127.8 (C-Ar), 128.9 (3  $\times$  CH-Ar), 129.8 (CH-Ar), 130.7 (2  $\times$  CH-Ar), 137.8 (C-Ar), 139.5 (CH-Ar) ppm. HRMS (ESI),  $m/z$ :  $[\text{M} + \text{Na}]^+$  calcd. for  $\text{C}_{13}\text{H}_{12}\text{INNaO}_2\text{S}^+$ : 395.9526; found: 395.9526.

***N*-(2-Iodophenyl)-*N*-(4-methoxybenzyl)-1-phenylmethanesulfonamide (**12**):** A solution of 4-methoxybenzyl chloride (3.44 g, 22.0 mmol) in DMF (10 mL) was added dropwise to a mixture of sulfonamide **11** (7.46 g, 20.0 mmol), K<sub>2</sub>CO<sub>3</sub> (4.14 g, 30.0 mmol) and DMF (60 mL) at 60 °C within 0.5 h. The reaction mixture was stirred at 60 °C for 2 h, and DMF was then removed on a rotary evaporator. The residue was taken up in  $\text{CH}_2\text{Cl}_2$  (150 mL) and 15% aq. HCl was carefully added until pH 2 was achieved. The organic phase was then washed with 5% aq. HCl (6  $\times$  50 mL), water (50 mL), brine (30 mL) and dried over  $\text{Na}_2\text{SO}_4$ . The solvents were removed, and the crude product was purified by recrystallization from hexane/EtOAc to give **12** (8.78 g, 89%) as a colorless solid, m.p. 144–146 °C.

**<sup>1</sup>H NMR** (300 MHz, CDCl<sub>3</sub>): δ = 3.78 (s, 3 H, OCH<sub>3</sub>), 4.37 (AB system, δ<sub>A</sub> = 4.34, δ<sub>B</sub> = 4.41, *J* = 13.5 Hz, SO<sub>2</sub>CH<sub>2</sub>), 4.50 (d, *J* = 14.5 Hz, 1 H, NCHH'), 4.96 (d, *J* = 14.5 Hz, 1 H, NCHH'), 6.78–6.81 (m, 3 H, H-Ar), 6.98 (td, *J* = 1.6, 7.9 Hz, 1 H, H-Ar), 7.11–7.156 (m, 2 H, H-Ar), 7.18 (td, *J* = 1.4, 7.9 Hz, 1 H, H-Ar), 7.36–7.39 (m, 5 H, H-Ar), 7.91 (dd, *J* = 1.6, 7.9 Hz, 1 H, H-Ar) ppm. **<sup>13</sup>C NMR** (75 MHz, CDCl<sub>3</sub>): δ = 54.9 (NCH<sub>2</sub>), 55.2 (OCH<sub>3</sub>), 60.7 (SO<sub>2</sub>CH<sub>2</sub>), 101.5 (C-I), 113.7 (2 × CH-Ar), 127.5 (C-Ar), 128.6 (3 × CH-Ar + C-Ar), 128.7 (CH-Ar), 129.9 (CH-Ar), 130.9 (2 × CH-Ar), 131.2 (2 × CH-Ar), 133.2 (CH-Ar), 140.2 (CH-Ar), 141.1 (C-Ar), 159.4 (C-Ar) ppm. **HRMS** (ESI), *m/z*: [M + Na]<sup>+</sup> calcd. for C<sub>21</sub>H<sub>20</sub>INNaO<sub>3</sub>S<sup>+</sup>: 516.0101; found: 516.0112.

## 2.5. General procedure for

### *Pd-catalyzed cyclization of N-alkyl-N-arylsulfonamides (5, 8a–g) (GP3)*

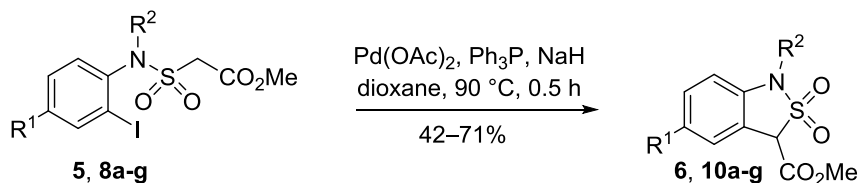

Sodium hydride (60% dispersion in oil, 320 mg, 8.0 mmol) was washed with anhydrous pentane (2 × 5 mL) and was then added to a stirred solution of the respective sulfonamide (2.00 mmol) and PPh<sub>3</sub> (105 mg, 400 μmol) in anhydrous dioxane (10 mL). Argon was bubbled through the resulting mixture for 15 min, and Pd(OAc)<sub>2</sub> (23 mg, 100 μmol) was then added in one portion. The mixture was stirred at 90 °C for 30 min, and concentrated down to a volume of 1 mL. The residue was carefully added to a vigorously stirred mixture of 5% aq. HCl (30 mL) and EtOAc (100 mL). The organic phase was separated, and the aqueous layer was extracted with EtOAc (2 × 50 mL). The combined organic fractions were washed with brine (20 mL), dried over anhydrous Na<sub>2</sub>SO<sub>4</sub> and concentrated. The crude product was purified by column chromatography (eluent: hexane/EtOAc, gradient from 0 to 100% of EtOAc).

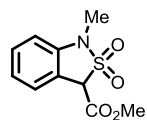

#### **Methyl 1-methyl-1,3-dihydrobenzo[*c*]isothiazole-3-carboxylate 2,2-dioxide (**6**):**

From **5** (367 mg, 994 μmol), compound **6** (187 mg, 78%) was obtained according to **GP3** (reaction time was 1 h) as a colorless solid, *R*<sub>f</sub> = 0.20 (hexane/EtOAc, 3:1), m.p. 122–123 °C. <sup>1</sup>H NMR (300 MHz, CDCl<sub>3</sub>): δ = 3.17 (s, 3 H, NCH<sub>3</sub>), 3.89 (s, 3 H, OCH<sub>3</sub>), 5.13 (s, 1 H, SO<sub>2</sub>CH), 6.78 (d, *J* = 8.0 Hz, 1 H, H-Ar), 7.07 (t, *J* = 7.6 Hz, 1 H, H-Ar), 7.35 (d, *J* = 7.6 Hz, 1 H, H-Ar), 7.40 (t, *J* = 8.0 Hz, 1 H, H-Ar) ppm. <sup>13</sup>C NMR (75 MHz, CDCl<sub>3</sub>): δ = 27.6 (NCH<sub>3</sub>), 53.9 (OCH<sub>3</sub>), 64.5 (SO<sub>2</sub>CH), 109.7 (CH-Ar), 117.7 (C-Ar), 122.4 (CH-Ar), 126.4 (CH-Ar), 130.6 (CH-Ar), 141.4 (C-Ar), 163.5 (CO) ppm. HRMS (ESI), *m/z*: [M + H]<sup>+</sup> calcd. for C<sub>10</sub>H<sub>12</sub>NO<sub>4</sub>S<sup>+</sup>: 242.0482; found: 242.0484.

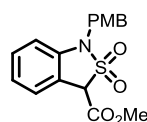

#### **Methyl 1-(4-methoxybenzyl)-1,3-dihydrobenzo[*c*]isothiazole-3-carboxylate 2,2-dioxide (**10a**):**

From **8a** (950 mg, 2.00 mmol), compound **10a** (569 mg, 82%) was obtained according to **GP3** as a colorless solid, *R*<sub>f</sub> = 0.28 (hexane/EtOAc, 2:1), m.p. 116–118 °C. <sup>1</sup>H NMR (400 MHz, CDCl<sub>3</sub>): δ = 3.79 (s, 3 H, OCH<sub>3</sub>), 3.91 (s, 3 H, OCH<sub>3</sub>), 4.73 (s, 2 H, NCH<sub>2</sub>), 5.18 (s, 1 H, SO<sub>2</sub>CH), 6.61 (d, *J* = 8.0 Hz, 1 H, H-Ar), 6.88–6.90 (m, 2 H, H-Ar), 7.02 (t, *J* = 7.6 Hz, 1 H, H-Ar), 7.23 (t, *J* = 8.0 Hz, 1 H, H-Ar), 7.32 (d, *J* = 7.6 Hz, 1 H, H-Ar), 7.34–7.37 (m, 2 H, H-Ar) ppm. <sup>13</sup>C NMR (100 MHz, CDCl<sub>3</sub>): δ = 45.6 (NCH<sub>2</sub>), 53.8 (OCH<sub>3</sub>), 55.2 (OCH<sub>3</sub>), 64.8 (SO<sub>2</sub>CH), 110.7 (CH-Ar), 114.2 (2 × CH-Ar), 117.6 (C-Ar), 122.3 (CH-Ar), 126.3 (CH-Ar), 126.7 (C-

Ar), 128.6 (2 × CH-Ar), 130.4 (CH-Ar), 140.6 (C-Ar), 159.3 (C-Ar), 163.6 (CO) ppm. **HRMS** (ESI),  $m/z$ :  $[M + Na]^+$  calcd. for  $C_{17}H_{17}NNaO_5S^+$ : 370.0720; found: 370.0720.

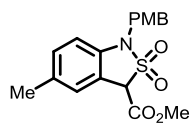

**Methyl 1-(4-methoxybenzyl)-5-methyl-1,3-dihydrobenzo[c]isothiazole-3-carboxylate 2,2-dioxide (10b)**: From **8b** (979 mg, 2.00 mmol), compound **10b** (513 mg, 71%) was obtained according to **GP3** as a colorless solid,  $R_f$  = 0.26 (hexane/EtOAc, 3:1), m.p. 124–125 °C.  **$^1H$  NMR** (400 MHz,  $CDCl_3$ ):  $\delta$  = 2.28 (s, 3H,  $CCH_3$ ), 3.79 (s, 3 H, O  $CH_3$ ), 3.90 (s, 3 H, O  $CH_3$ ), 4.70 (s, 2 H,  $NCH_2$ ), 5.13 (s, 1 H,  $SO_2CH$ ), 6.51 (d,  $J$  = 8.1 Hz, 1 H, H-Ar), 6.86–6.90 (m, 2 H, H-Ar), 7.03 (d,  $J$  = 8.1 Hz, 1 H, H-Ar), 7.13 (s, 1 H, H-Ar), 7.32–7.36 (m, 2 H, H-Ar) ppm.  **$^{13}C$  NMR** (100 MHz,  $CDCl_3$ ):  $\delta$  = 20.8 ( $CH_3$ ), 46.1 ( $NCH_2$ ), 53.8 ( $OCH_3$ ), 55.3 ( $OCH_3$ ), 65.0 ( $SO_2CH$ ), 110.9 (CH-Ar), 114.2 (2 × CH-Ar), 117.8 (C-Ar), 126.7 (CH-Ar), 127.0 (C-Ar), 128.7 (2 × CH-Ar), 130.9 (CH-Ar), 132.2 (C-Ar), 138.4 (C-Ar), 159.3 (C-Ar), 163.8 (CO) ppm. **HRMS** (ESI),  $m/z$ :  $[M + Na]^+$  calcd. for  $C_{18}H_{19}NNaO_5S^+$ : 384.0876; found: 384.0888.

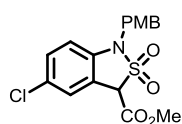

**Methyl 5-chloro-1-(4-methoxybenzyl)-1,3-dihydrobenzo[c]isothiazole-3-carboxylate 2,2-dioxide (10c)**: From **8c** (1.02 g, 2.00 mmol), compound **10c** (519 mg, 68%) was obtained according to **GP3** as a colorless solid,  $R_f$  = 0.22 (hexane/EtOAc, 3:1), m.p. 117–118 °C.  **$^1H$  NMR** (400 MHz,  $CDCl_3$ ):  $\delta$  = 3.79 (s, 3 H,  $OCH_3$ ), 3.92 (s, 3 H,  $OCH_3$ ), 4.71 (s, 2 H,  $NCH_2$ ), 5.16 (s, 1 H,  $SO_2CH$ ), 6.53 (d,  $J$  = 8.5 Hz, 1 H, H-Ar), 6.88–6.90 (m, 2 H, H-Ar), 7.20 (dd,  $J$  = 2.0, 8.5 Hz, 1 H, H-Ar), 7.31–7.34 (m, 3 H, H-Ar) ppm.  **$^{13}C$  NMR** (100 MHz,  $CDCl_3$ ):  $\delta$  = 45.8 ( $NCH_2$ ), 54.0 ( $OCH_3$ ), 55.3 ( $OCH_3$ ), 64.5 ( $SO_2CH$ ), 111.9 (CH-Ar), 114.3 (2 × CH-Ar), 119.0 (C-Ar), 126.1 (C-Ar), 126.6 (CH-Ar), 127.6 (C-Ar), 128.7 (2 × CH-Ar), 130.4 (CH-Ar), 139.0 (C-Ar), 159.4 (C-Ar), 163.0 (CO) ppm. **HRMS** (ESI),  $m/z$ :  $[M + Na]^+$  calcd. for  $C_{17}H_{16}ClNNaO_5S^+$ : 404.0330; found: 404.0331.

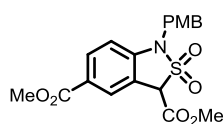

**Dimethyl 1-(4-methoxybenzyl)-1,3-dihydrobenzo[c]isothiazole-3,5-dicarboxylate 2,2-dioxide (10d)**: From **8d** (1.07 g, 2.01 mmol), compound **10d** (634 mg, 78%) was obtained according to **GP3** as a colorless solid,  $R_f$  = 0.17 (hexane/EtOAc, 2:1), m.p. 168–169 °C.  **$^1H$  NMR** (400 MHz,  $CDCl_3$ ):  $\delta$  = 3.79 (s, 3H,  $OCH_3$ ), 3.87 (s, 3H,  $OCH_3$ ), 3.92 (s, 3H,  $OCH_3$ ), 4.78 (AB system,  $\delta_A$  = 4.76,  $\delta_B$  = 4.80,  $J$  = 16.3 Hz,  $NCH_2$ ), 5.23 (s, 1H,  $SO_2CH$ ), 6.63 (d,  $J$  = 8.5 Hz, 1H, H-Ar), 6.87–6.91 (m, 2 H, H-Ar), 7.31–7.36 (m, 2 H, H-Ar), 7.95 (dd,  $J$  = 8.5, 1.3 Hz, 1H, H-Ar), 8.00 (br. s, 1H, H-Ar) ppm.  **$^{13}C$  NMR** (100 MHz,  $CDCl_3$ ):  $\delta$  = 45.2 ( $NCH_2$ ), 52.1 ( $OCH_3$ ), 54.0 ( $OCH_3$ ), 55.2 ( $OCH_3$ ), 64.5 ( $SO_2CH$ ), 109.8 (CH-Ar), 114.4 (2 × CH-Ar), 117.1 (C-Ar), 124.0 (C-Ar), 125.9 (C-Ar), 127.8 (CH-Ar), 128.6 (2 × CH-Ar), 132.5 (CH-Ar), 143.8 (C-Ar), 159.5 (C-Ar), 163.0 (CO), 165.8 (CO) ppm. **HRMS** (ESI),  $m/z$ :  $[M + Na]^+$  calcd. for  $C_{19}H_{19}NNaO_7S^+$ : 428.0774; found: 428.0775.

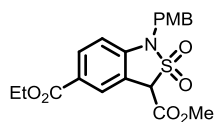

**5-Ethyl 1-(4-methoxybenzyl)-3-(methoxycarbonyl)-1,3-dihydrobenzo[c]-isothiazole-5-carboxylate 2,2-dioxide (10e):** From **8e** (125 mg, 228  $\mu$ mol), compound **10e** (82.1 mg, 86%) was obtained according to **GP3** as a colorless solid,

$R_f$  = 0.26 (hexane/EtOAc, 2:1), m.p. 116–118 °C.  $^1\text{H NMR}$  (400 MHz,  $\text{CDCl}_3$ ):  $\delta$  = 1.34 (t,  $J$  = 7.1 Hz, 3 H,  $\text{CH}_2\text{CH}_3$ ), 3.77 (s, 3 H,  $\text{OCH}_3$ ), 3.90 (s, 3 H,  $\text{OCH}_3$ ), 4.40–4.23 (m, 2 H,  $\text{CH}_2\text{CH}_3$ ), 4.76 (AB system,  $\delta_A$  = 4.73,  $\delta_B$  = 4.78,  $J$  = 16.3 Hz,  $\text{NCH}_2$ ), 5.24 (s, 1 H,  $\text{SO}_2\text{CH}$ ), 6.62 (d,  $J$  = 8.5 Hz, 1 H, H-Ar), 6.83–6.91 (m, 2 H, H-Ar), 7.36–7.28 (m, 2 H, H-Ar), 7.94 (dd,  $J$  = 8.4, 1.4 Hz, 1 H, H-Ar), 8.00 (m, 1 H, H-Ar) ppm.  $^{13}\text{C NMR}$  (100 MHz,  $\text{CDCl}_3$ ):  $\delta$  = 14.2 ( $\text{CH}_2\text{CH}_3$ ), 45.1 ( $\text{NCH}_2$ ), 53.9 ( $\text{OCH}_3$ ), 55.2 ( $\text{OCH}_3$ ), 61.0 ( $\text{CH}_2\text{CH}_3$ ), 64.5 ( $\text{SO}_2\text{CH}$ ), 109.7 (CH-Ar), 114.3 ( $2 \times \text{CH-Ar}$ ), 117.0 (C-Ar), 124.3 (C-Ar), 125.8 (C-Ar), 127.7 (CH-Ar), 128.6 ( $2 \times \text{CH-Ar}$ ), 132.4 (CH-Ar), 143.7 (C-Ar), 159.4 (C-Ar), 163.0 (CO), 165.3 (CO) ppm. **HRMS** (ESI),  $m/z$ :  $[\text{M} + \text{Na}]^+$  calcd. for  $\text{C}_{20}\text{H}_{21}\text{NNaO}_7\text{S}^+$ : 442.0931; found: 442.0922.

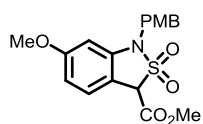

**Methyl 6-methoxy-1-(4-methoxybenzyl)-1,3-dihydrobenzo[c]isothiazole-3-carboxylate 2,2-dioxide (10f):** From **8f** (1.01 g, 2.00  $\mu$ mol), compound **10f** (680 mg, 90%) was obtained according to **GP3** (reaction time was 3 h) as a colorless oil,

which spontaneously crystallized when stored in a freezer,  $R_f$  = 0.27 (hexane/EtOAc, 2:1), m.p. 61–63 °C.  $^1\text{H NMR}$  (400 MHz,  $\text{CDCl}_3$ ):  $\delta$  = 3.66 (s, 3 H,  $\text{OCH}_3$ ), 3.76 (s, 3 H,  $\text{OCH}_3$ ), 3.87 (s, 3 H,  $\text{OCH}_3$ ), 4.69 (AB system,  $\delta_A$  = 4.67,  $\delta_B$  = 4.70,  $J$  = 16.3 Hz,  $\text{NCH}_2$ ), 5.14 (s, 1 H,  $\text{SO}_2\text{CH}$ ), 6.17 (d,  $J$  = 2.4 Hz, 1 H, H-Ar), 6.52 (dd,  $J$  = 8.5, 2.4 Hz, 1 H, H-Ar), 6.85–6.90 (m, 2 H, H-Ar), 7.20 (dd,  $J$  = 8.5, 0.8 Hz, 1 H, H-Ar), 7.32–7.38 (m, 2 H, H-Ar) ppm.  $^{13}\text{C NMR}$  (100 MHz,  $\text{CDCl}_3$ ):  $\delta$  = 45.4 ( $\text{NCH}_2$ ), 53.6 ( $\text{OCH}_3$ ), 55.1 ( $\text{OCH}_3$ ), 55.2 ( $\text{OCH}_3$ ), 64.5 ( $\text{SO}_2\text{CH}$ ), 97.8 (CH-Ar), 106.8 (CH-Ar), 109.2 (C-Ar), 114.1 ( $2 \times \text{CH-Ar}$ ), 126.6 (C-Ar), 127.1 (CH-Ar), 128.6 ( $2 \times \text{CH-Ar}$ ), 141.5 (C-Ar), 159.2 (C-Ar), 161.3 (C-Ar), 163.8 (CO) ppm. **HRMS** (ESI),  $m/z$ :  $[\text{M} + \text{Na}]^+$  calcd. for  $\text{C}_{18}\text{H}_{19}\text{NNaO}_6\text{S}^+$ : 400.0825; found: 400.0812.

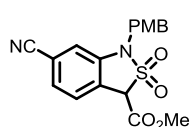

**Methyl 6-cyano-1-(4-methoxybenzyl)-1,3-dihydrobenzo[c]isothiazole-3-carboxylate 2,2-dioxide (10g):** From **8g** (1.00 g, 2.00  $\mu$ mol), compound **10g** (693 mg, 93%) was obtained according to **GP3** (reaction time was 5 min) as a colorless

solid,  $R_f$  = 0.30 (hexane/EtOAc, 1:2), m.p. 146–147 °C.  $^1\text{H NMR}$  (400 MHz,  $\text{CDCl}_3$ ):  $\delta$  = 3.81 (s, 3 H,  $\text{OCH}_3$ ), 3.93 (s, 3 H,  $\text{OCH}_3$ ), 4.75 (s, 2 H,  $\text{NCH}_2$ ), 5.23 (s, 1 H,  $\text{SO}_2\text{CH}$ ), 6.80 (d,  $J$  = 1.2 Hz, 1 H, H-Ar), 6.86–6.98 (m, 2 H, H-Ar), 7.32 (dd,  $J$  = 7.9, 1.2 Hz, 1 H, H-Ar), 7.31–7.35 (m, 2 H, H-Ar), 7.46 (d,  $J$  = 7.9 Hz, 1 H, H-Ar) ppm.  $^{13}\text{C NMR}$  (100 MHz,  $\text{CDCl}_3$ ):  $\delta$  = 45.4 ( $\text{NCH}_2$ ), 54.1 ( $\text{OCH}_3$ ), 55.2 ( $\text{OCH}_3$ ), 64.3 ( $\text{SO}_2\text{CH}$ ), 112.9 (CH-Ar), 114.1 (C), 114.5 ( $2 \times \text{CH-Ar}$ ), 117.8 (C), 122.1 (C),



125.2 (C-Ar), 126.0 (CH-Ar), 127.3 (CH-Ar), 128.6 ( $2 \times$  CH-Ar), 140.9 (C-Ar), 159.6 (C-Ar), 162.4 (CO) ppm. **HRMS** (ESI),  $m/z$ :  $[M + Na]^+$  calcd. for  $C_{18}H_{16}N_2NaO_5S^+$ : 395.6072; found: 395.0655.

2.6. Synthesis of methyl 3-(4-methoxyphenyl)-1*H*-3,4-dihydrobenzo[*d*][1,2]thiazine-1-carboxylate 2,2-dioxide (**21**)

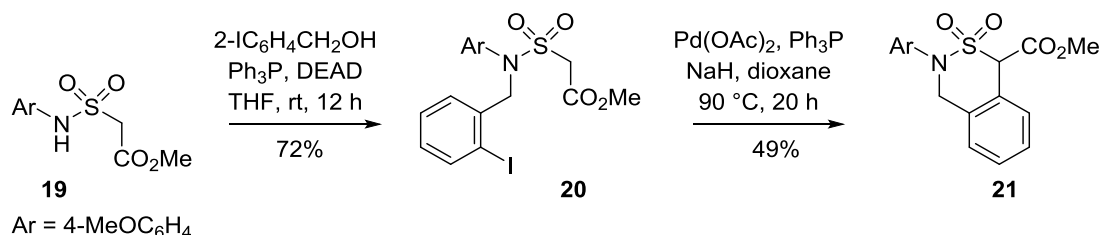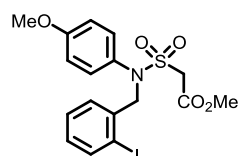

**Methyl 2-[N-(2-iodobenzyl)-N-(4-methoxyphenyl)sulfamoyl]acetate (20):**

Diethyl azodicarboxylate (DEAD) (1.31 g, 7.52 mmol) was slowly added to a stirred solution of the sulfonamide **19** (1.30 g, 5.01 mmol), (2-iodophenyl)methanol (1.76 g, 7.52 mmol) and  $\text{Ph}_3\text{P}$  (1.97 g, 7.51 mmol) in anhydrous THF (10 mL) at 0 °C, and the resulting mixture was stirred at rt for 12 h. The solvents were then removed, and the product was isolated by column chromatography (hexane/EtOAc 6:1,  $R_f$  = 0.58) to give the sulfonamide **20** (1.95 g, 82%) as a colorless solid, m.p. 89–91 °C.

$^1\text{H}$  NMR (400 MHz,  $\text{CDCl}_3$ ):  $\delta$  = 3.76 (s, 3 H,  $\text{OCH}_3$ ), 3.89 (s, 3 H,  $\text{OCH}_3$ ), 4.04 (s, 2 H,  $\text{SO}_2\text{CH}_2$ ), 4.99 (s, 2 H,  $\text{NCH}_2$ ), 6.81–6.85 (m, 2 H, H-Ar), 6.90 (td,  $J$  = 7.7, 1.4 Hz, 1 H, H-Ar), 7.31 (td,  $J$  = 7.7, 0.9 Hz, 1 H, H-Ar), 7.35–7.39 (m, 2 H, H-Ar), 7.57 (dd,  $J$  = 7.8, 1.4 Hz, 1 H, H-Ar), 7.70 (dd,  $J$  = 7.8, 0.9 Hz, 1 H, H-Ar) ppm.  $^{13}\text{C}$  NMR (100 MHz,  $\text{CDCl}_3$ ):  $\delta$  = 53.2 ( $\text{OCH}_3$ ), 53.9 ( $\text{CH}_2$ ), 55.4 ( $\text{OCH}_3$ ), 60.9 ( $\text{CH}_2$ ), 98.7 (C-I), 114.6 (2  $\times$  CH-Ar), 128.4 (CH-Ar), 129.3 (CH-Ar), 129.7 (CH-Ar), 130.4 (C-Ar), 130.5 (2  $\times$  CH-Ar), 138.4 (C-Ar), 139.3 (CH-Ar), 159.5 (C-Ar), 163.9 (CO) ppm.

**HRMS** (ESI),  $m/z$ :  $[\text{M} + \text{Na}]^+$  calcd. for  $\text{C}_{17}\text{H}_{18}\text{INNaO}_5\text{S}^+$ : 497.9843; found: 497.9842.

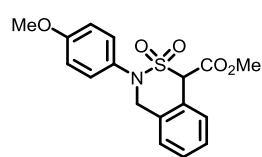

**Methyl 3-(4-methoxyphenyl)-1*H*-3,4-dihydrobenzo[*d*][1,2]thiazine-1-carboxylate 2,2-dioxide (21):**

From **20** (310 mg, 652  $\mu\text{mol}$ ), compound **21** (111 mg, 49%) was obtained according to **GP3** (reaction time was 20 h) as a colorless solid,  $R_f$  = 0.10 (hexane/EtOAc, 6 : 1), m.p. 105–106 °C.  $^1\text{H}$  NMR (400 MHz,  $\text{CDCl}_3$ ):  $\delta$  = 3.78 (s, 3 H,  $\text{OCH}_3$ ), 3.79 (s, 3 H,  $\text{OCH}_3$ ), 5.03 (AB system,  $\delta_A$  4.97,  $\delta_B$  5.08,  $J$  = 16.6 Hz,  $\text{NCH}_2$ ), 5.23 (s, 1 H,  $\text{SO}_2\text{CH}$ ), 6.84–6.88 (m, 2 H, H-Ar), 7.15 (d,  $J$  = 7.6 Hz, 1 H, H-Ar), 7.22 (d,  $J$  = 8.4 Hz, 1 H, H-Ar), 7.24–7.28 (m, 2 H, H-Ar), 7.34 (td,  $J$  = 7.6, 1.3 Hz, 1 H, H-Ar), 7.40 (td,  $J$  = 7.6, 1.3 Hz, 1 H, H-Ar) ppm.  $^{13}\text{C}$  NMR (125 MHz,  $\text{CDCl}_3$ ):  $\delta$  = 53.4 ( $\text{OCH}_3$ ), 55.4 ( $\text{OCH}_3$ ), 56.0 ( $\text{NCH}_2$ ), 64.8 ( $\text{SO}_2\text{CH}$ ), 114.4 (2  $\times$  CH-Ar), 126.6 (CH-Ar), 127.8 (CH-Ar), 128.0 (2  $\times$  CH-Ar), 128.1 (C-Ar), 129.1 (CH-Ar), 129.9 (CH-Ar), 130.8 (C-Ar), 132.6 (C-Ar), 159.0 (C-Ar), 165.5 (CO) ppm. **HRMS** (ESI),  $m/z$ :  $[\text{M} + \text{Na}]^+$  calcd. for  $\text{C}_{17}\text{H}_{17}\text{NNaO}_5\text{S}^+$ : 370.0720; found: 370.0701.

## 2.7. Miscellaneous transformations

### Synthesis of the indole 2-(4-methoxyphenyl)-3-phenyl-1*H*-indole (**18**)

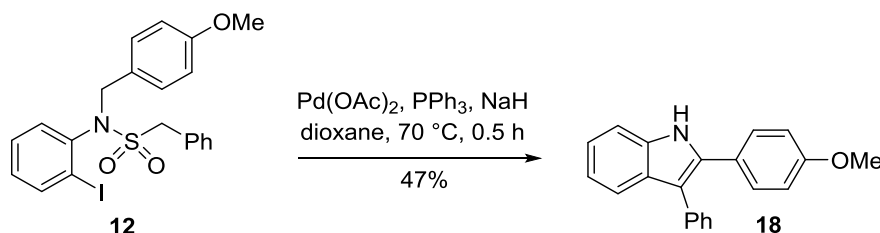

**2-(4-Methoxyphenyl)-3-phenyl-1*H*-indole (**18**):** From **12** (494 mg, 1.00 mmol) compound **18** (139 mg, 46%) was obtained according to **GP3** (reaction was carried out at  $70^\circ\text{C}$ ) as a yellowish solid m.p.  $92\text{--}93^\circ\text{C}$ , lit.<sup>13</sup> m.p.  $94\text{--}95^\circ\text{C}$ .  $^1\text{H NMR}$  (300 MHz,  $\text{CDCl}_3$ ):  $\delta = 3.82$  (s, 3 H,  $\text{OCH}_3$ ), 6.85–6.89 (m, 2 H, H-Ar), 7.12–7.46 (m, 10 H, H-Ar), 7.68 (d,  $J = 8.0$  Hz, 1 H, H-Ar), 8.18 (br s, 1 H, NH) ppm. **HRMS** (ESI),  $m/z$ :  $[\text{M}]^+$  calcd. for  $\text{C}_{21}\text{H}_{17}\text{NO}^+$ : 299.1305; found: 299.1300.

### Synthesis of the methyl 1-(4-methoxybenzyl)-3-(methoxycarbonyl)-1,3-dihydrobenzo[*c*]isothiazole-5-carboxylic acid 2,2-dioxide (**10h**)

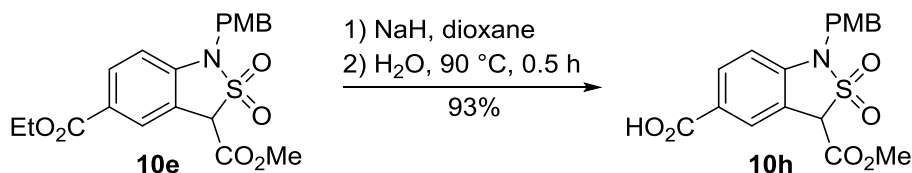

**1-(4-Methoxybenzyl)-3-(methoxycarbonyl)-1,3-dihydrobenzo[*c*]isothiazole-5-carboxylic acid 2,2-dioxide (**10h**):** Sodium hydride (60% dispersion in oil, 80.1 mg, 2.00 mmol) was washed with anhydrous pentane ( $2 \times 1$  mL) and was then added to a stirred solution of the sultam **10e** (210 mg, 501  $\mu\text{mol}$ ) in dioxane (3 mL). The resulting mixture was stirred at rt for 5 min, and  $\text{H}_2\text{O}$  (36.0  $\mu\text{L}$ , 2.00 mmol) was carefully added. The reaction mixture was warmed up to  $90^\circ\text{C}$ , stirred at this temperature for 30 min, and concentrated down to a volume of 1 mL. The residue was added to a vigorously stirred mixture of 5% aq.  $\text{HCl}$  (10 mL) and  $\text{EtOAc}$  (20 mL). The organic phase was separated, and the aqueous layer was extracted with  $\text{EtOAc}$  ( $2 \times 10$  mL). The combined organic fractions were dried over anhydrous  $\text{Na}_2\text{SO}_4$  and concentrated to give the acid **10h** (183 mg, 93%) as a colorless solid,  $R_f = 0.31$  ( $\text{EtOAc}$ ), m.p.  $210\text{--}215^\circ\text{C}$  (dec.).  $^1\text{H NMR}$  (400 MHz,  $\text{DMSO}-d_6$ ):  $\delta = 3.73$  (s, 3 H,  $\text{OCH}_3$ ), 3.84 (s, 3 H,  $\text{OCH}_3$ ), 4.84 (s, 2 H,  $\text{NCH}_2$ ), 6.12 (s, 1 H,  $\text{SO}_2\text{CH}$ ), 6.88 (d,  $J = 8.4$  Hz, 1 H, H-Ar), 6.91–6.95 (m, 2 H, H-Ar), 7.34–7.37 (m, 2 H, H-Ar), 7.90 (dd,  $J = 8.4, 1.8$  Hz, 1 H, H-Ar), 8.00 (s, 1 H, H-Ar), 12.86 (br. s, 1 H,  $\text{CO}_2\text{H}$ ) ppm.  $^{13}\text{C NMR}$  (100 MHz,  $\text{DMSO}-d_6$ ):  $\delta = 43.7$  ( $\text{NCH}_2$ ), 53.7 ( $\text{OCH}_3$ ), 55.1 ( $\text{OCH}_3$ ), 64.1 ( $\text{SO}_2\text{CH}$ ), 109.6 ( $\text{CH-Ar}$ ), 114.1 ( $2 \times \text{CH-Ar}$ ), 117.4 ( $\text{C-Ar}$ ), 124.1 ( $\text{C-Ar}$ ), 126.6 ( $\text{C-Ar}$ ), 128.3 ( $\text{CH-Ar}$ ), 128.8 ( $2 \times \text{CH-Ar}$ ), 131.7 ( $\text{CH-Ar}$ ),

<sup>13</sup> Cacchi, S.; Fabrizi, G.; Goggiamani, A. *Adv. Synth. Catal.* **2006**, *348*, 1301–1305.

143.0 (C-Ar), 158.9 (C-Ar), 163.2 (CO), 166.5 (CO) ppm. **HRMS** (ESI),  $m/z$ :  $[M + Na]^+$  calcd. for  $C_{18}H_{17}NNaO_7S^+$  414.0608; found: 414.0618.

Synthesis of the methyl 1-(4-methoxybenzyl)-3-(nitrooxy)-1,3-dihydrobenzo[c]isothiazole-3-carboxylate 2,2-dioxide (**22**)

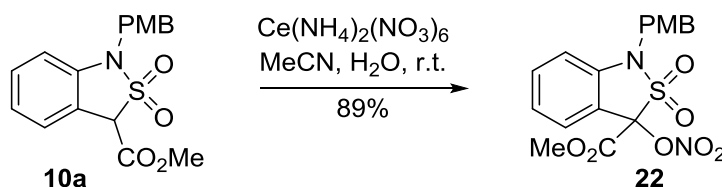

**Methyl 1-(4-methoxybenzyl)-3-(nitrooxy)-1,3-dihydrobenzo[c]isothiazole-3-carboxylate-2,2-dioxide (**22**)**: A solution of  $Ce(NH_4)_2(NO_3)_6$  (3.30 g, 6.02 mmol) in water (20 mL) was slowly added to a stirred solution of the sultam **10a** (696 mg, 2.00 mmol) in  $CH_3CN$  (30 mL) at 0 °C, and the resulting mixture was stirred at r.t. for 1 h. Acetonitrile was removed on a rotary evaporator, and the residue was extracted with EtOAc (3 × 20 mL). The combined organic fractions were dried over anhydrous  $Na_2SO_4$  and concentrated. The crude product was subjected to column chromatography (eluent: hexane/EtOAc, gradient from 0 to 50% of EtOAc) to give **22** (726 mg, 89%) as a pale orange solid,  $R_f$  = 0.28 (hexane/EtOAc, 2:1), m.p. 110–115 °C (dec.).  **$^1H$  NMR** (400 MHz,  $CDCl_3$ ):  $\delta$  = 3.80 (s, 3 H,  $OCH_3$ ), 3.90 (s, 3 H,  $OCH_3$ ), 4.82 (AB system,  $\delta_A$  = 4.75,  $\delta_B$  = 4.88,  $J$  = 16.2 Hz,  $NCH_2$ ), 6.66 (d,  $J$  = 8.0 Hz, 1 H, H-Ar), 6.89–6.93 (m, 2 H, H-Ar), 7.04 (t,  $J$  = 7.6 Hz, 1H, H-Ar), 7.27–7.48 (m, 4 H, H-Ar) ppm.  **$^{13}C$  NMR** (100 MHz,  $CDCl_3$ ):  $\delta$  = 46.8 ( $NCH_2$ ), 54.6 ( $OCH_3$ ), 55.3 ( $OCH_3$ ), 92.6 ( $SO_2CO$ ), 111.8 (CH-Ar), 114.3 (2 × CH-Ar), 116.6 (C-Ar), 122.9 (CH-Ar), 125.8 (CH-Ar), 126.4 (C-Ar), 128.8 (2 × CH-Ar), 132.9 (CH-Ar), 139.8 (C-Ar), 159.5 (C-Ar), 162.5 (CO) ppm. **HRMS** (ESI),  $m/z$ :  $[M + Na]^+$  calcd. for  $C_{17}H_{16}N_2NaO_8S^+$ : 431.0520; found: 431.0525.

Synthesis of the methyl 1,3-dihydrobenzo[c]isothiazole-3-carboxylate-2,2-dioxide (**23**)

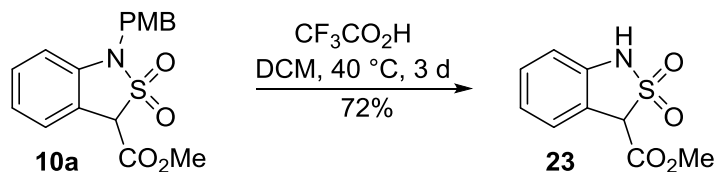

**Methyl 1,3-dihydrobenzo[c]isothiazole-3-carboxylate-2,2-dioxide (**23**)**: A solution of  $CF_3CO_2H$  (570 mg, 5.00 mmol) in  $CH_2Cl_2$  (1 mL) was added in one portion to a stirred solution of the sultam **10a** (347 mg, 1.00 mmol) in  $CH_2Cl_2$  (30 mL), and the resulting mixture was stirred under reflux for 3 days. The solvent was evaporated, and the crude product was purified by column chromatography (eluent: hexane/EtOAc, gradient from 30 to 80% of EtOAc) to give sultam **23** (163 mg, 72%) as a

colorless oil,  $R_f = 0.39$  (hexane/EtOAc, 1:1).  **$^1\text{H}$  NMR** (400 MHz,  $\text{CDCl}_3$ ):  $\delta = 3.87$  (s, 3 H,  $\text{OCH}_3$ ), 5.15 (s, 1 H,  $\text{SO}_2\text{CH}$ ), 6.91 (br. s, 1 H, NH), 6.96 (d,  $J = 8.1$  Hz, 1 H, H-Ar), 7.14 (t,  $J = 7.5$  Hz, 1 H, H-Ar), 7.31–7.35 (m, 2 H, H-Ar) ppm.  **$^{13}\text{C}$  NMR** (100 MHz,  $\text{CDCl}_3$ ):  $\delta = 53.8$  ( $\text{OCH}_3$ ), 66.0 ( $\text{SO}_2\text{CH}$ ), 114.8 (CH-Ar), 121.3 (C-Ar), 124.3 (CH-Ar), 126.5 (CH-Ar), 130.5 (CH-Ar), 138.6 (C-Ar), 163.9 (CO) ppm. **HRMS** (ESI),  $m/z$ :  $[\text{M} + \text{Na}]^+$  calcd. for  $\text{C}_9\text{H}_9\text{NNaO}_4\text{S}^+$ : 250.0144; found: 250.0137.

### 3 NMR spectra

#### 3.1. $^1\text{H}$ and $^{13}\text{C}$ NMR spectra of *N*-PMB substituted *o*-iodoanilines

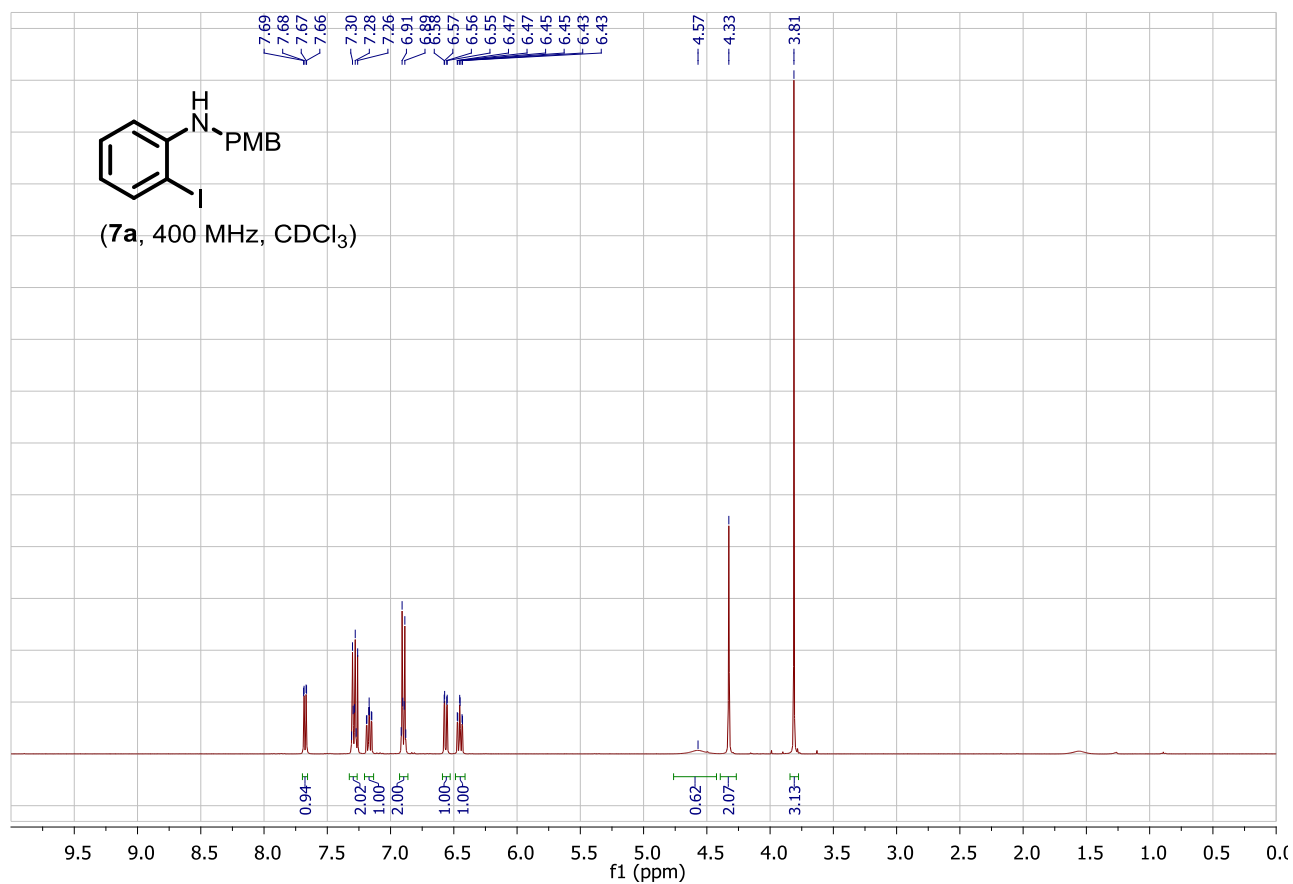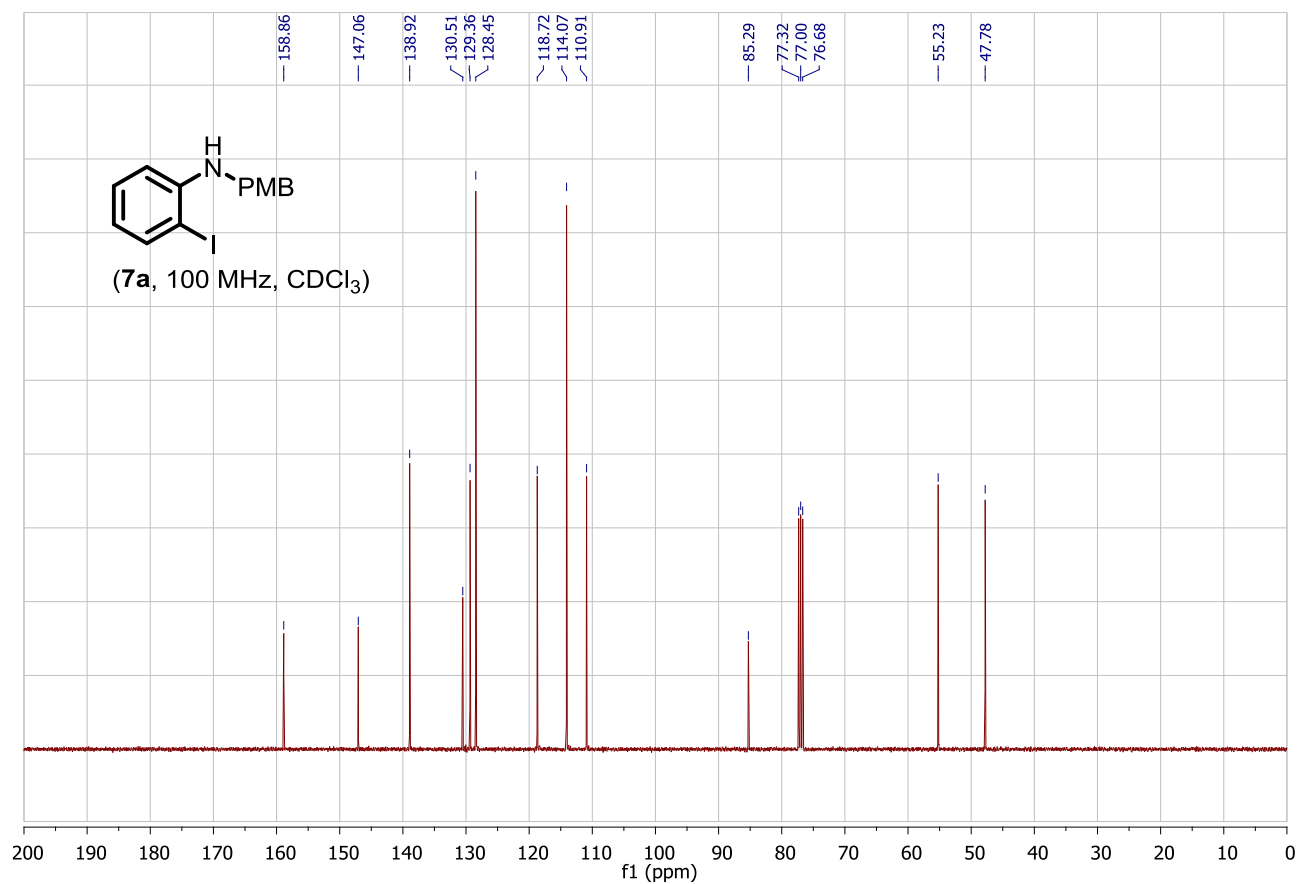

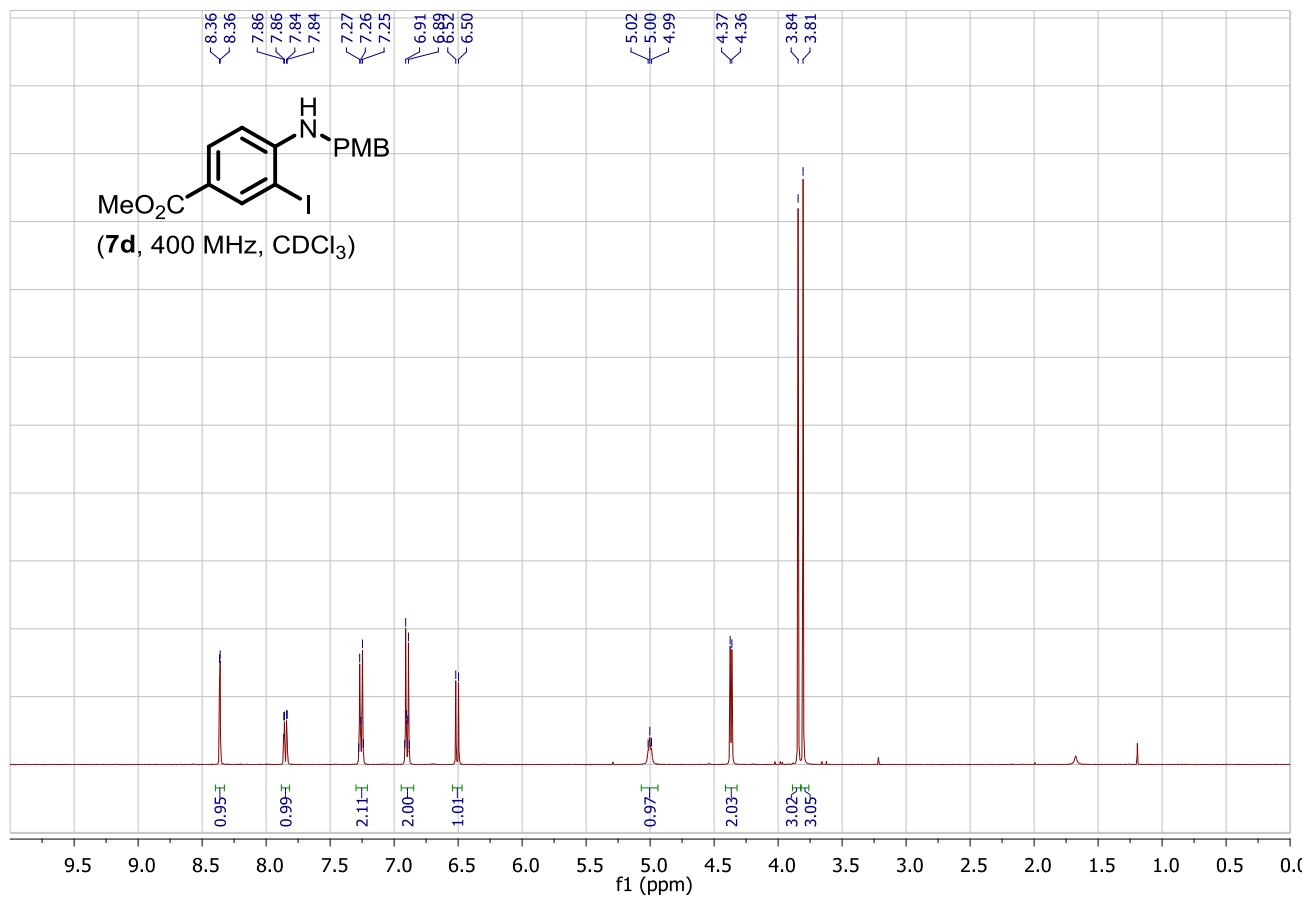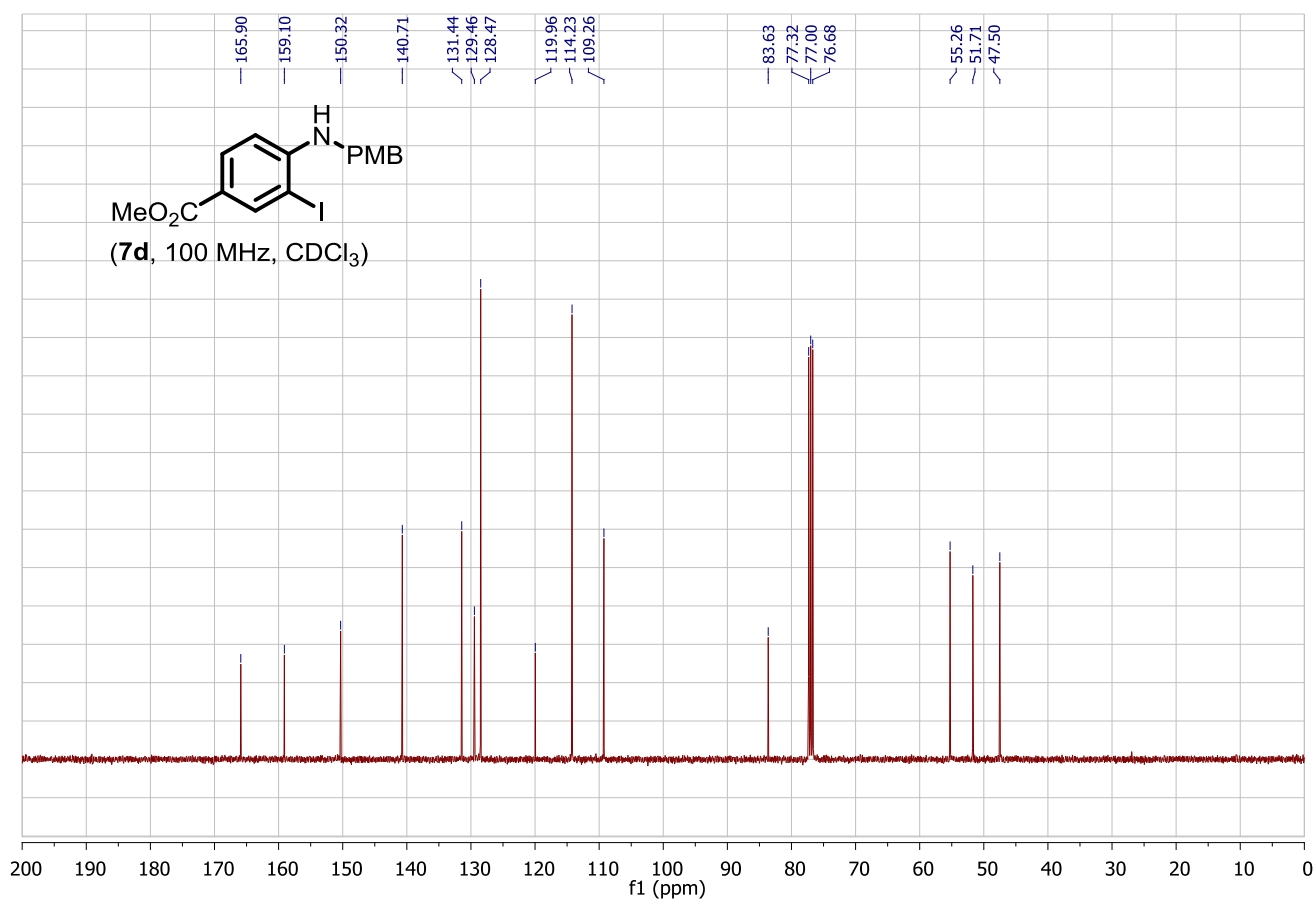

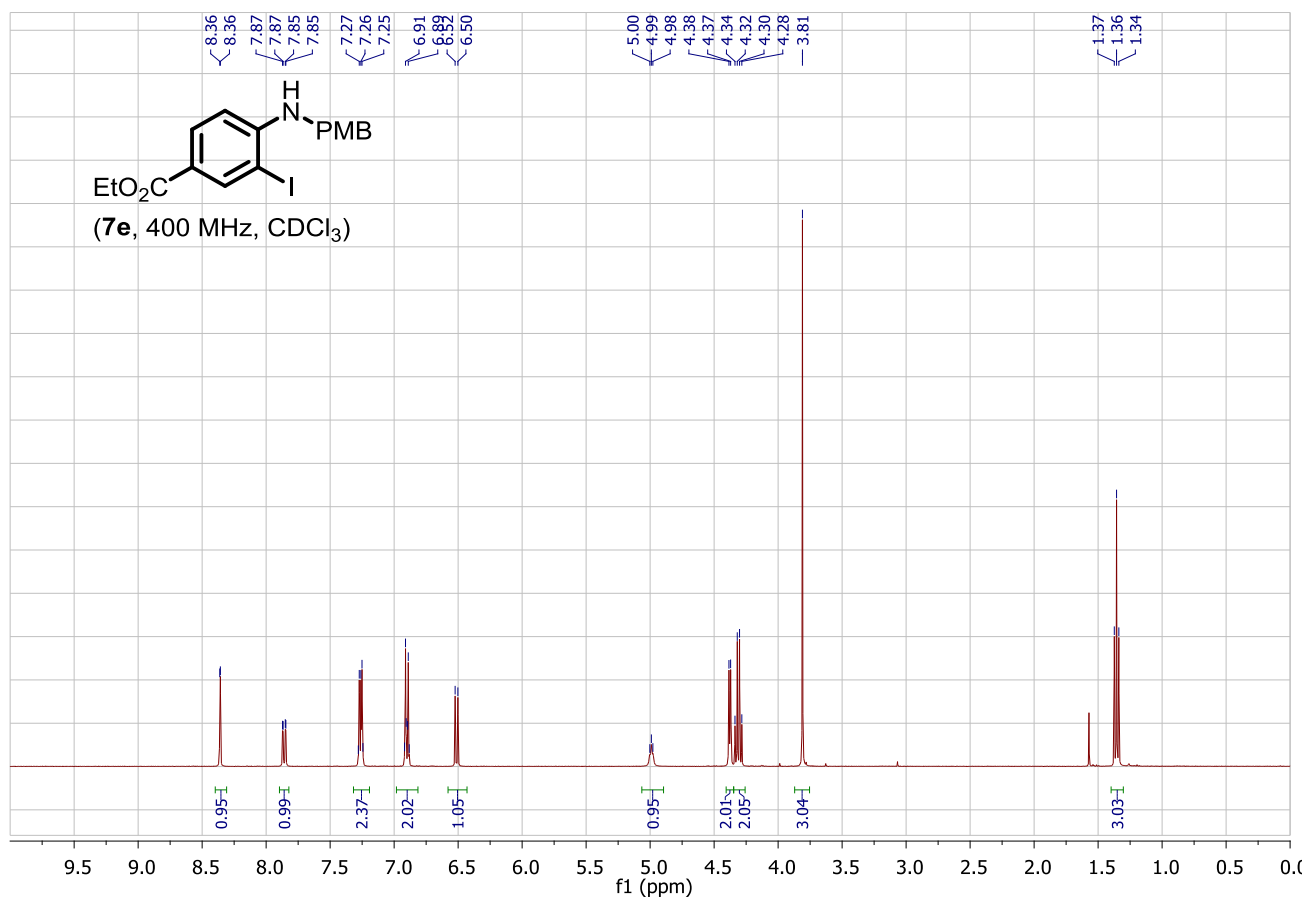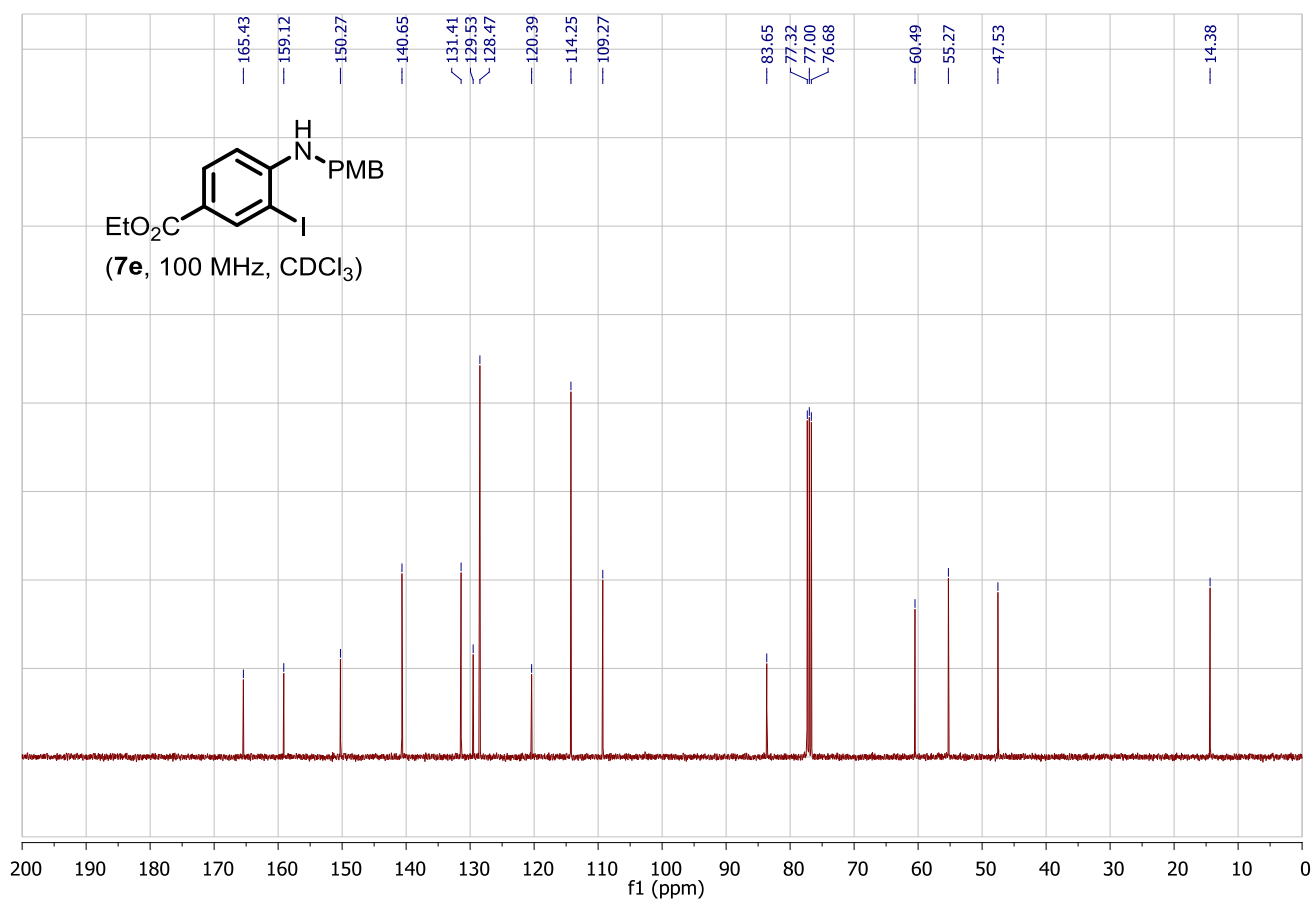



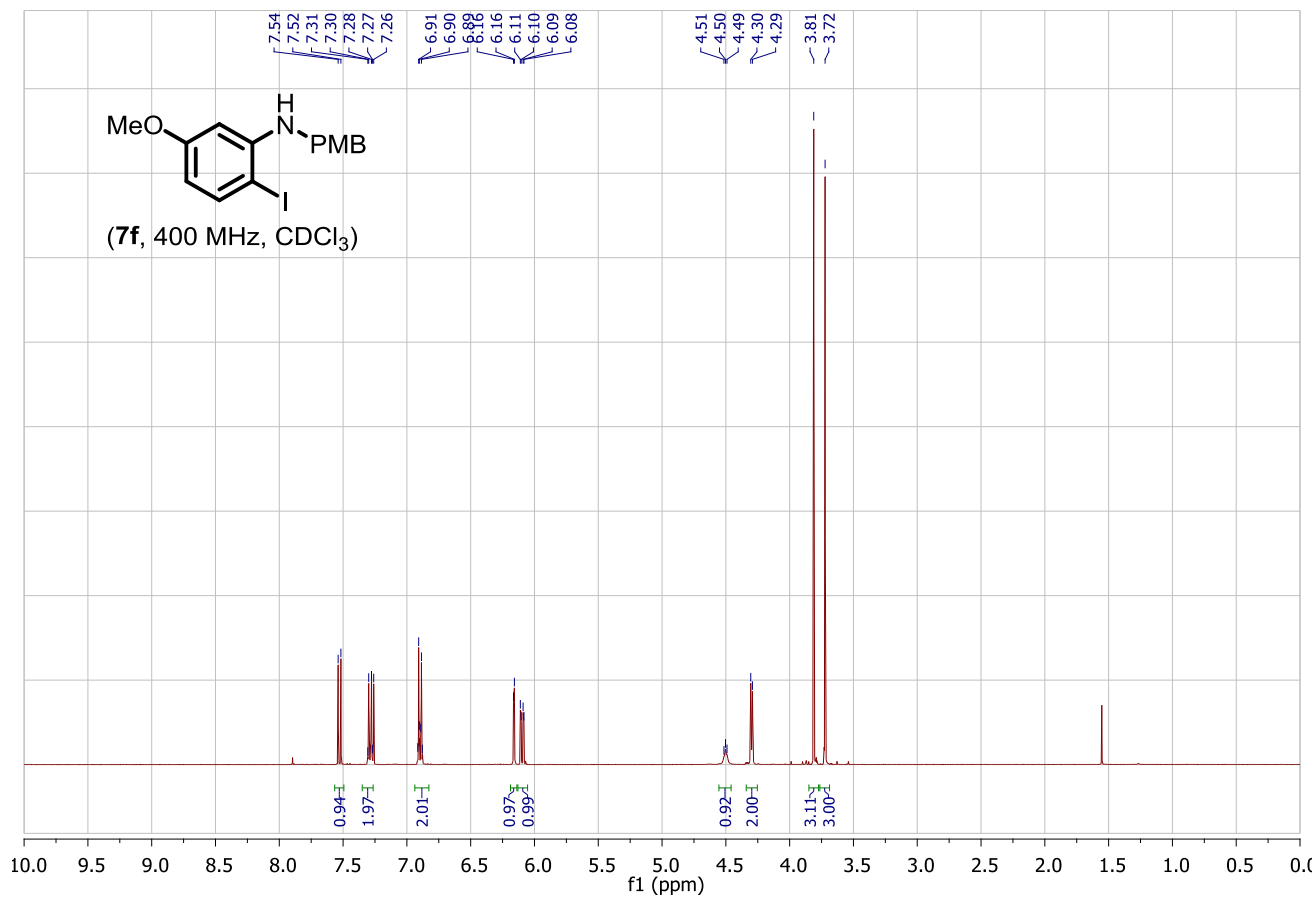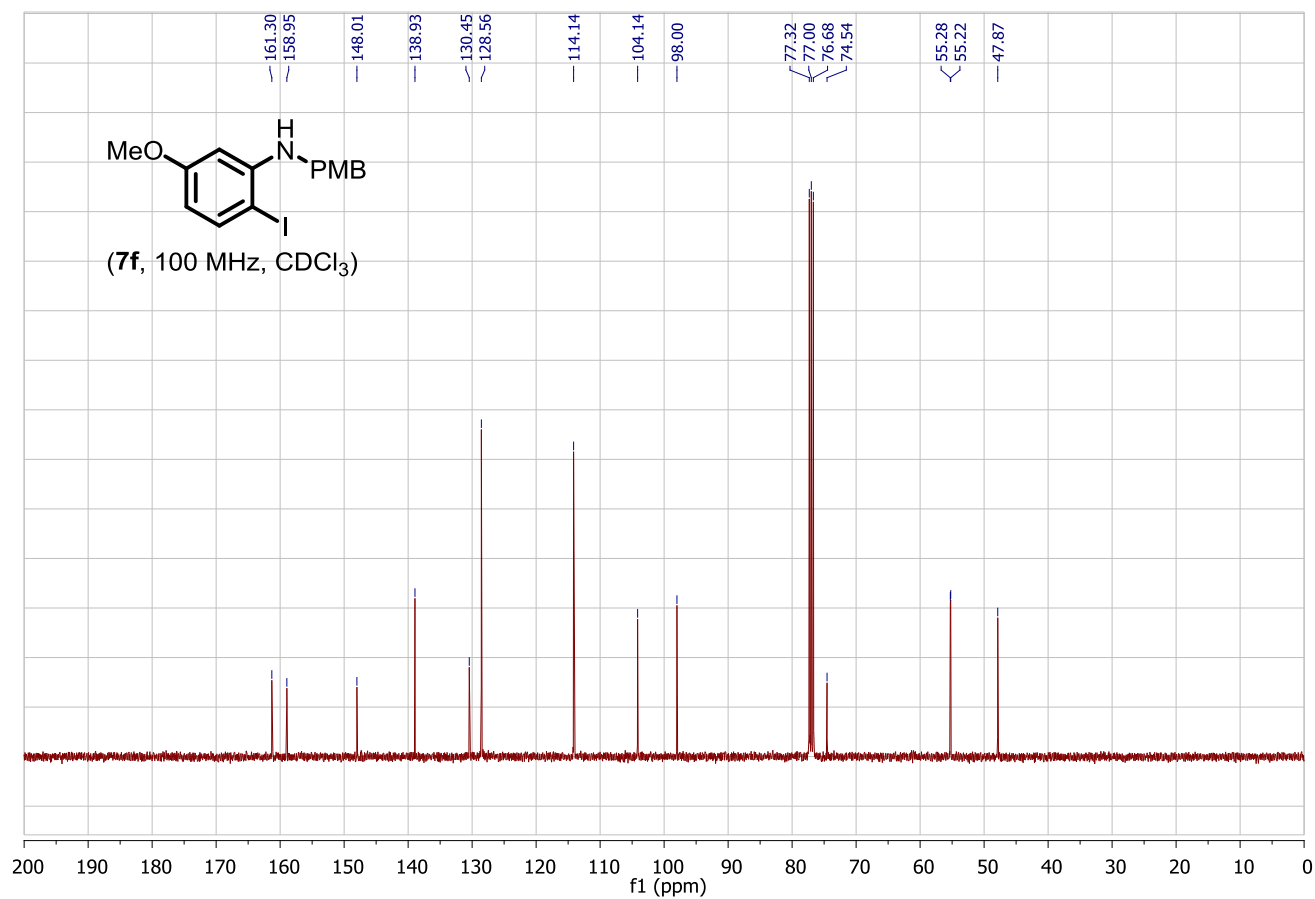

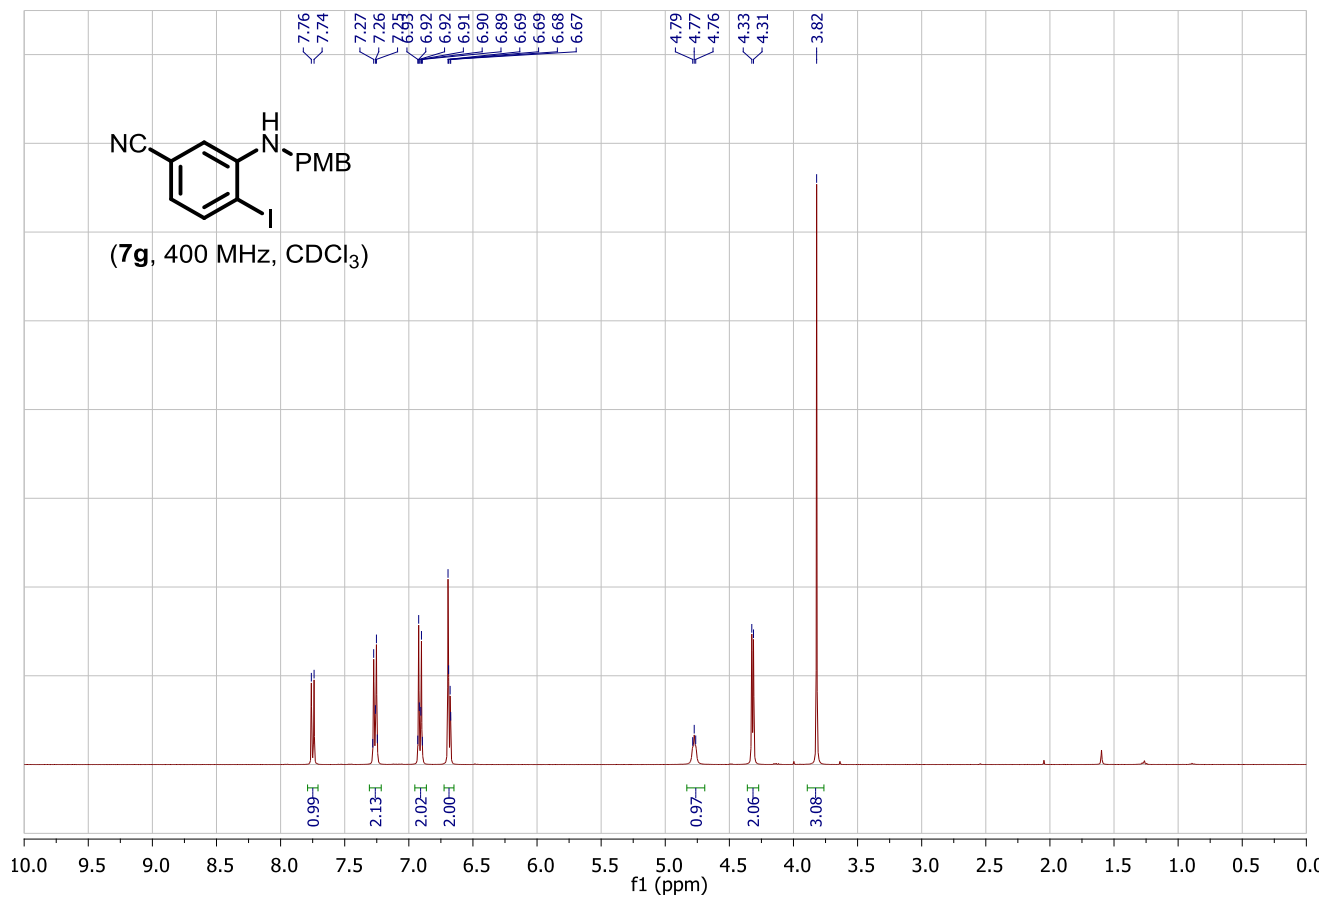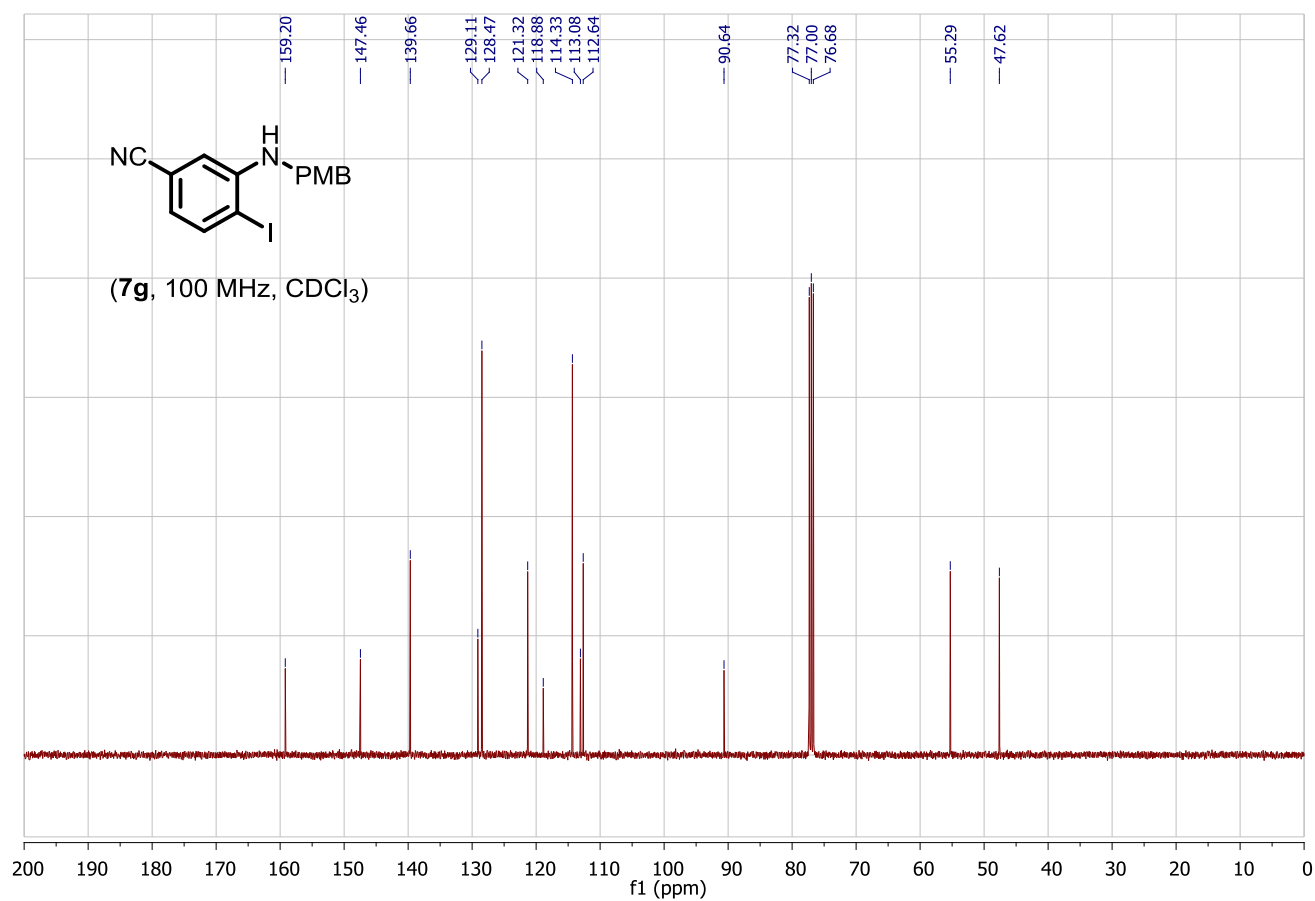

### 3.2. $^1\text{H}$ and $^{13}\text{C}$ NMR spectra of sulfonamides

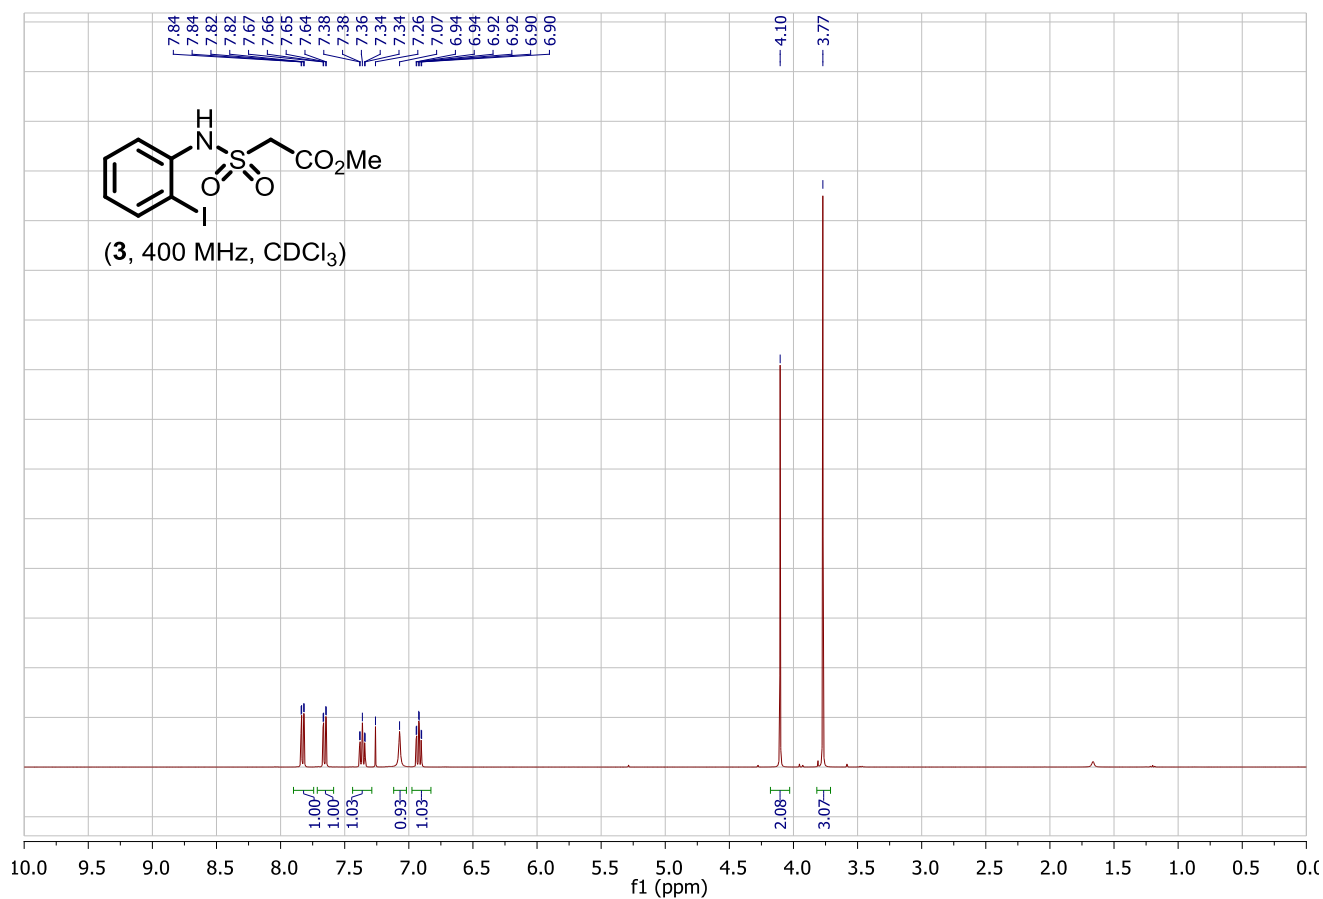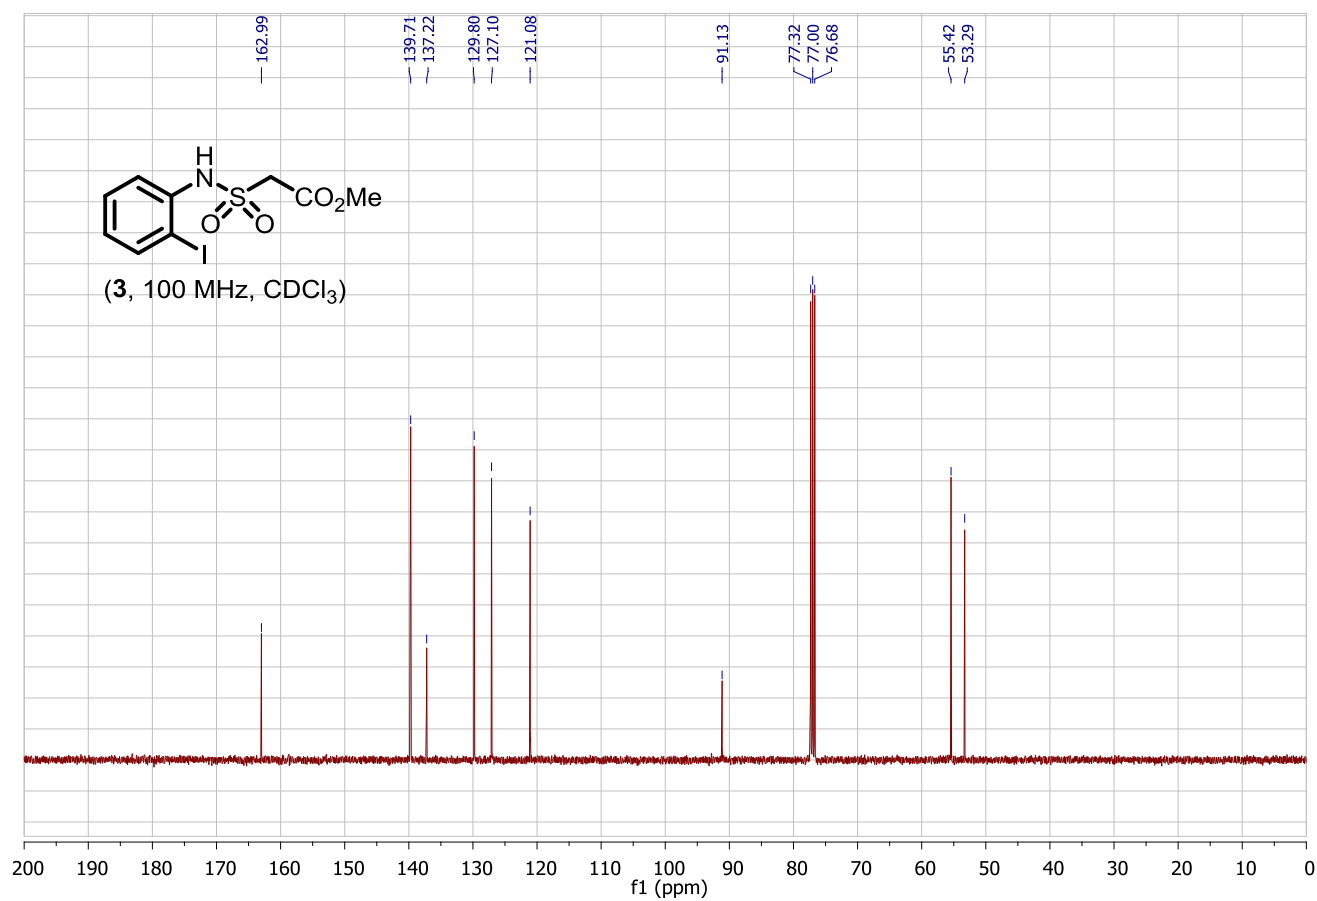

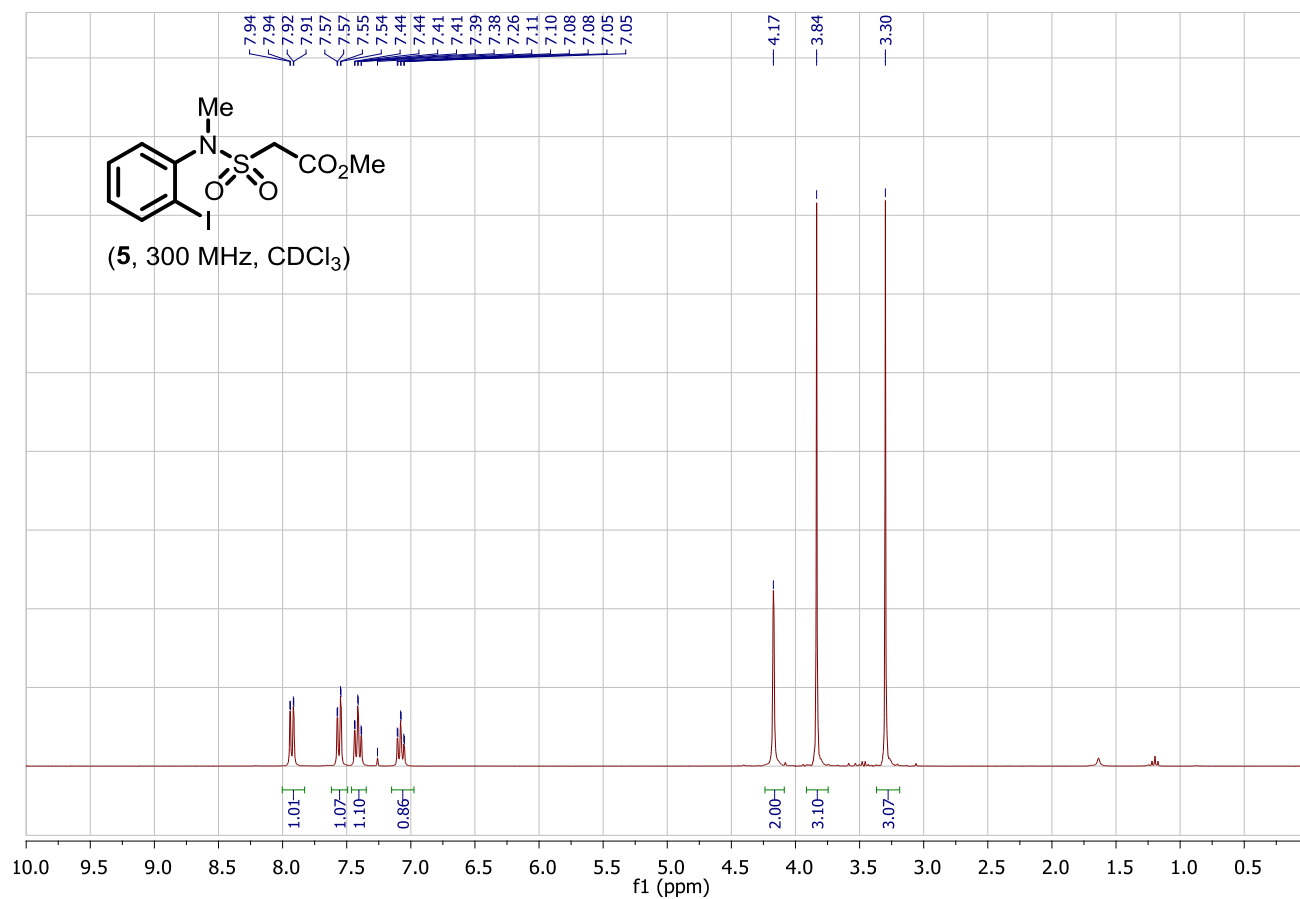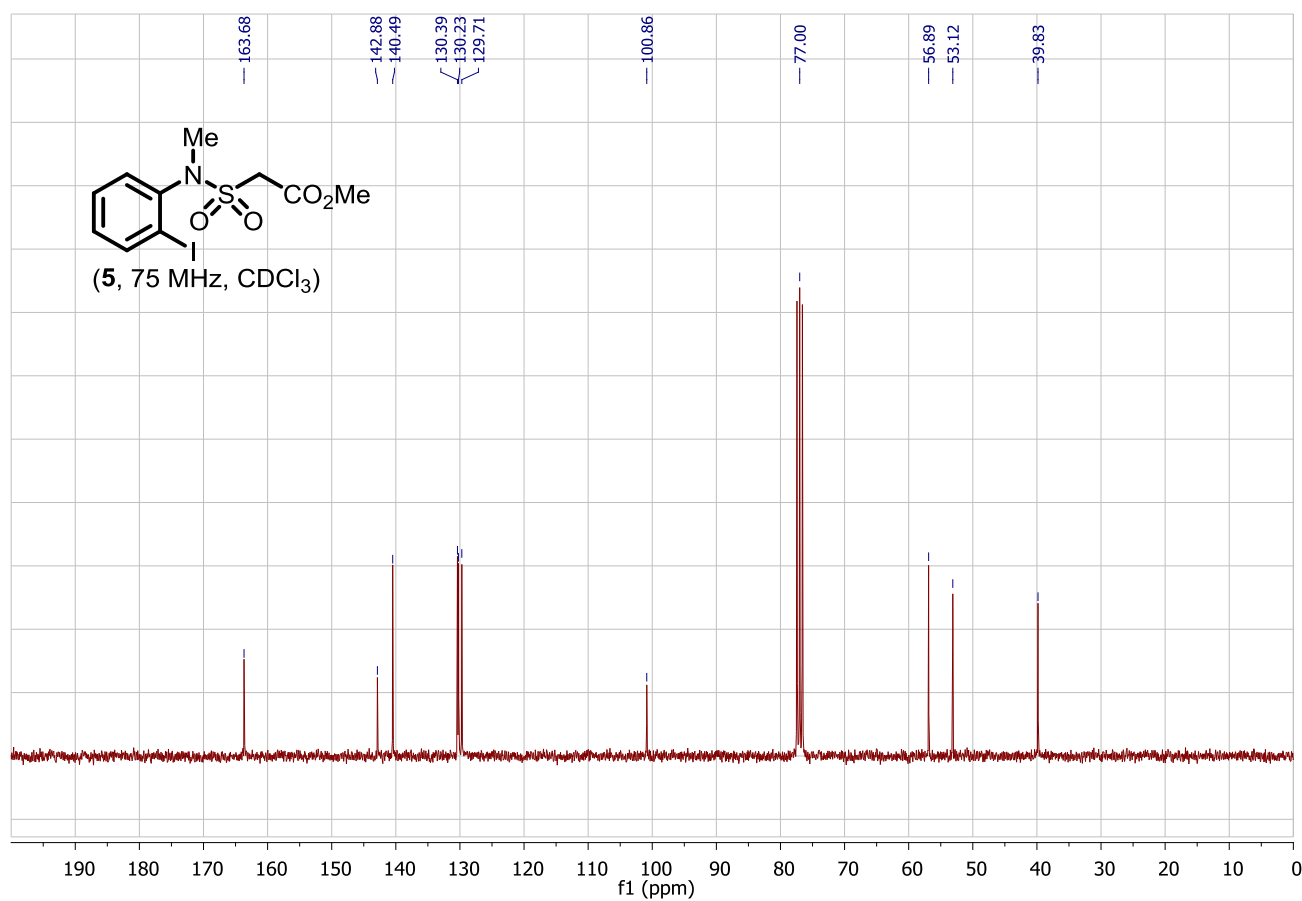

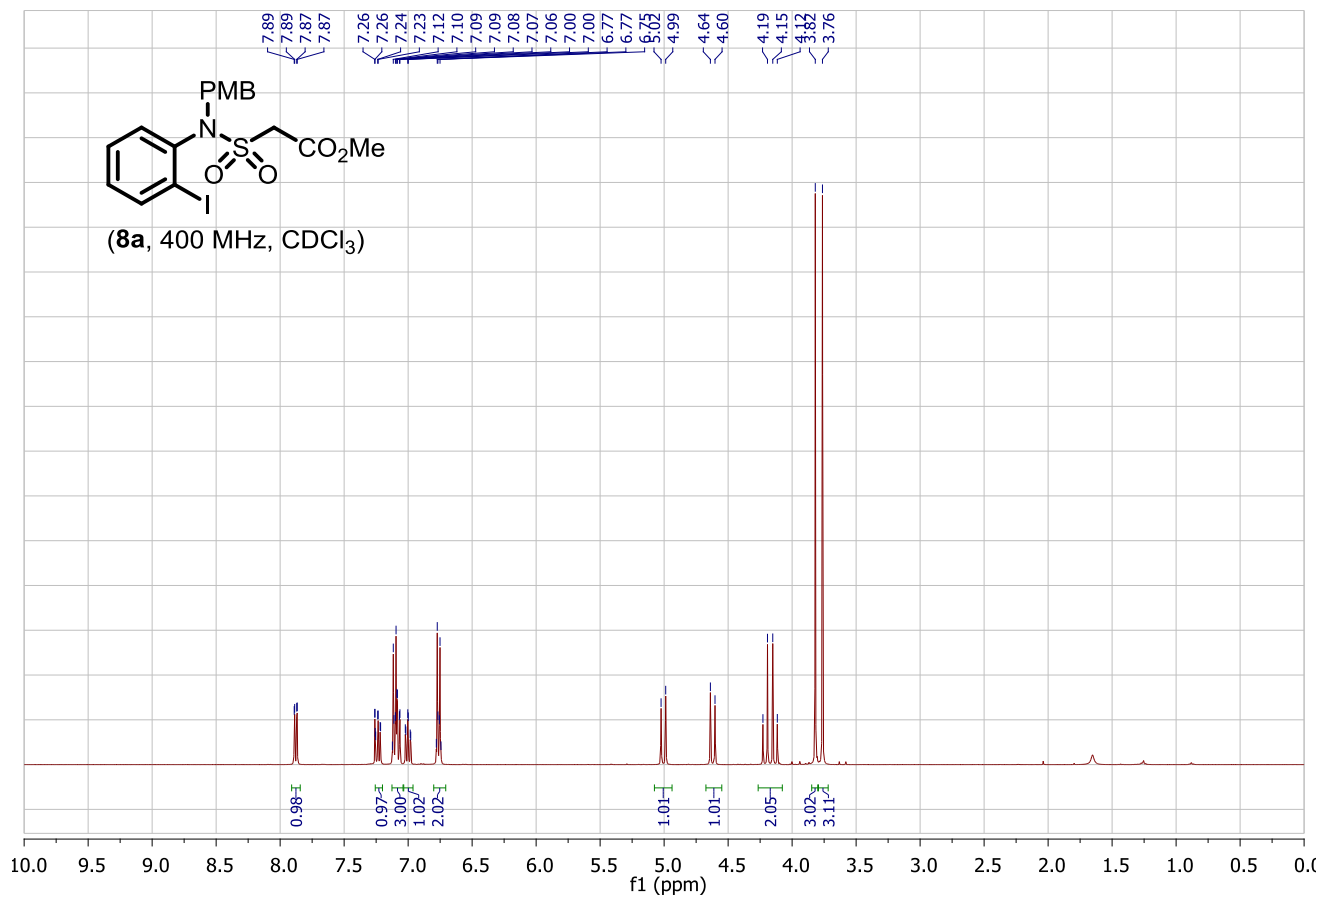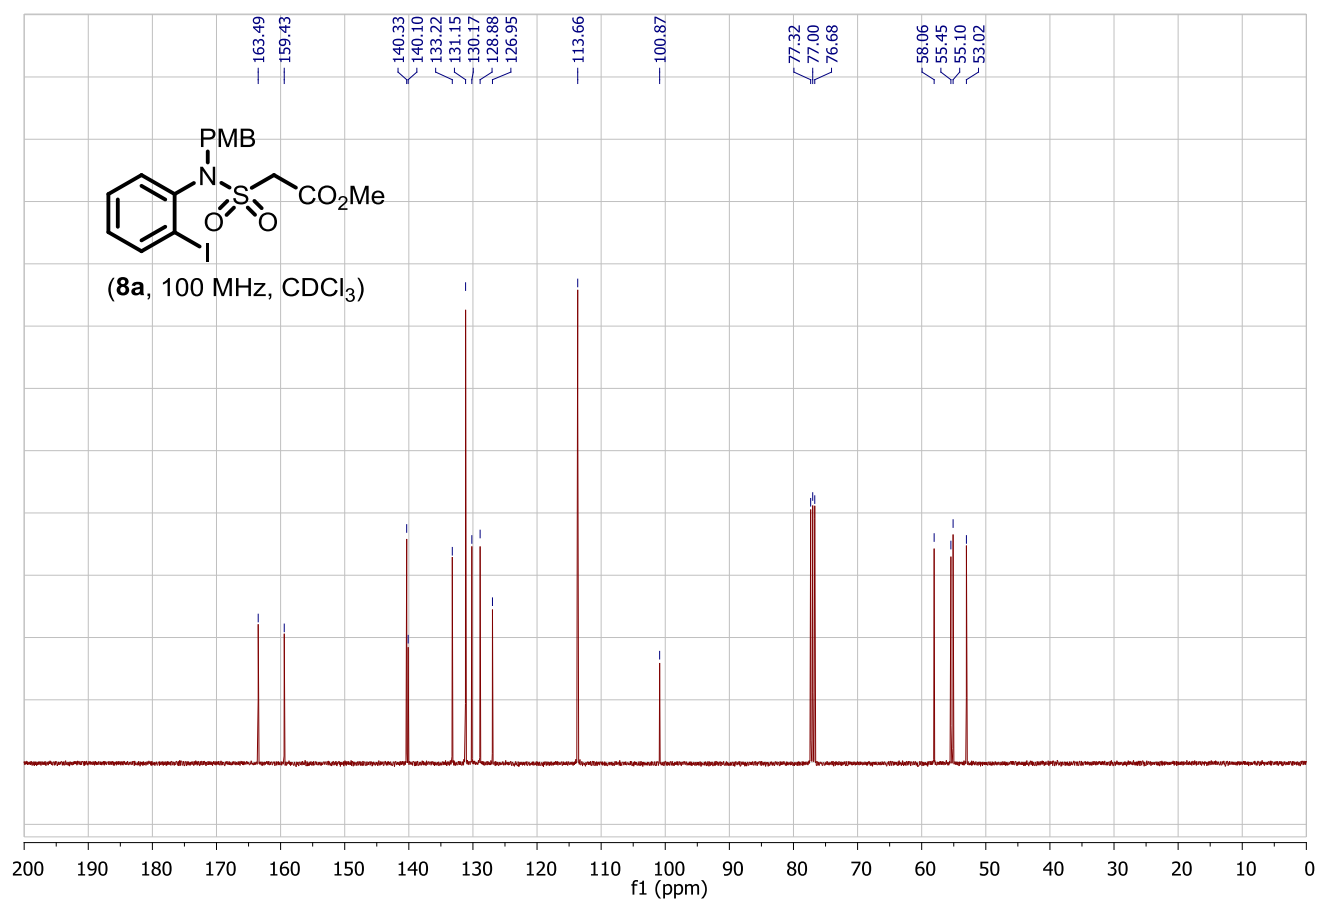

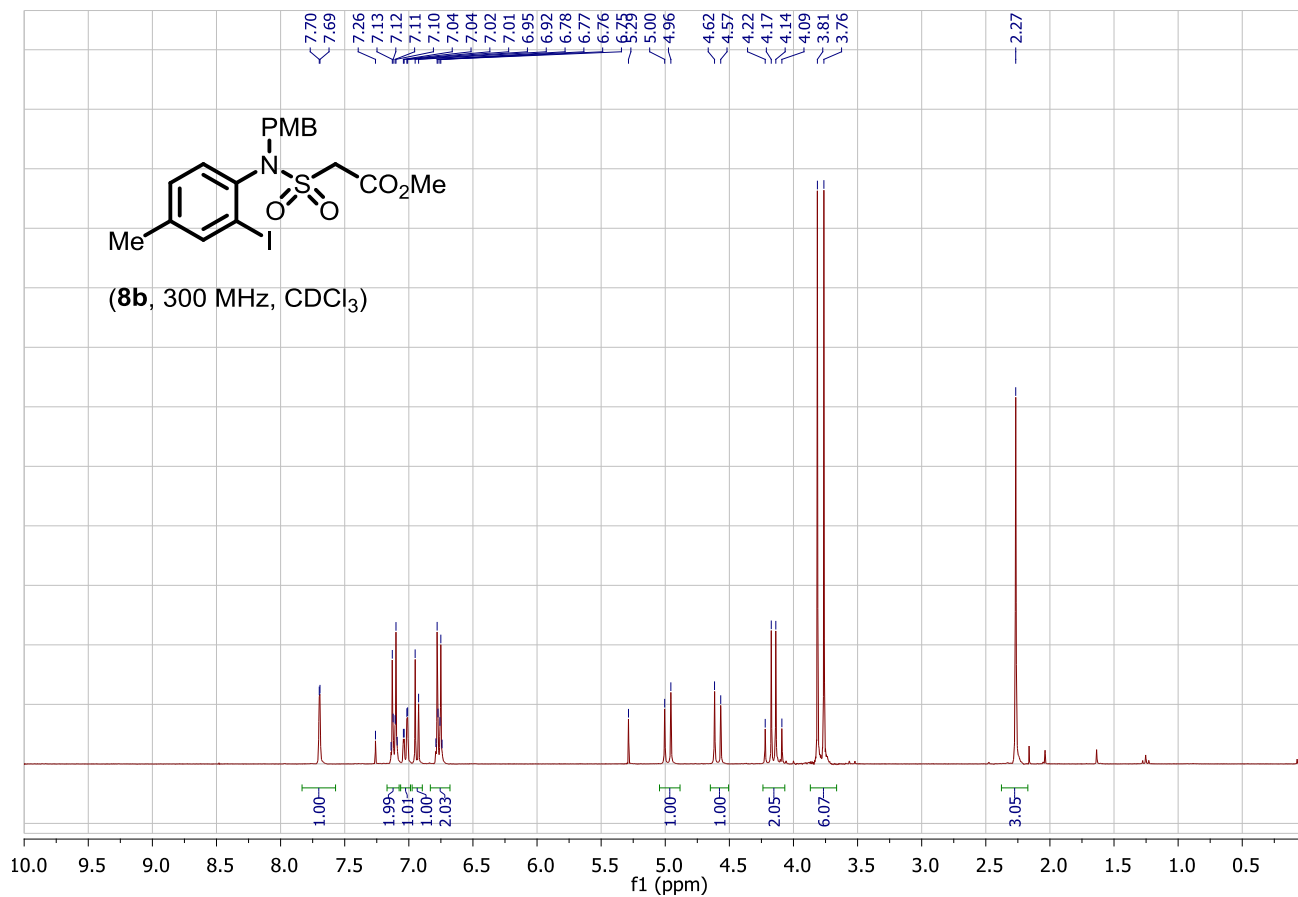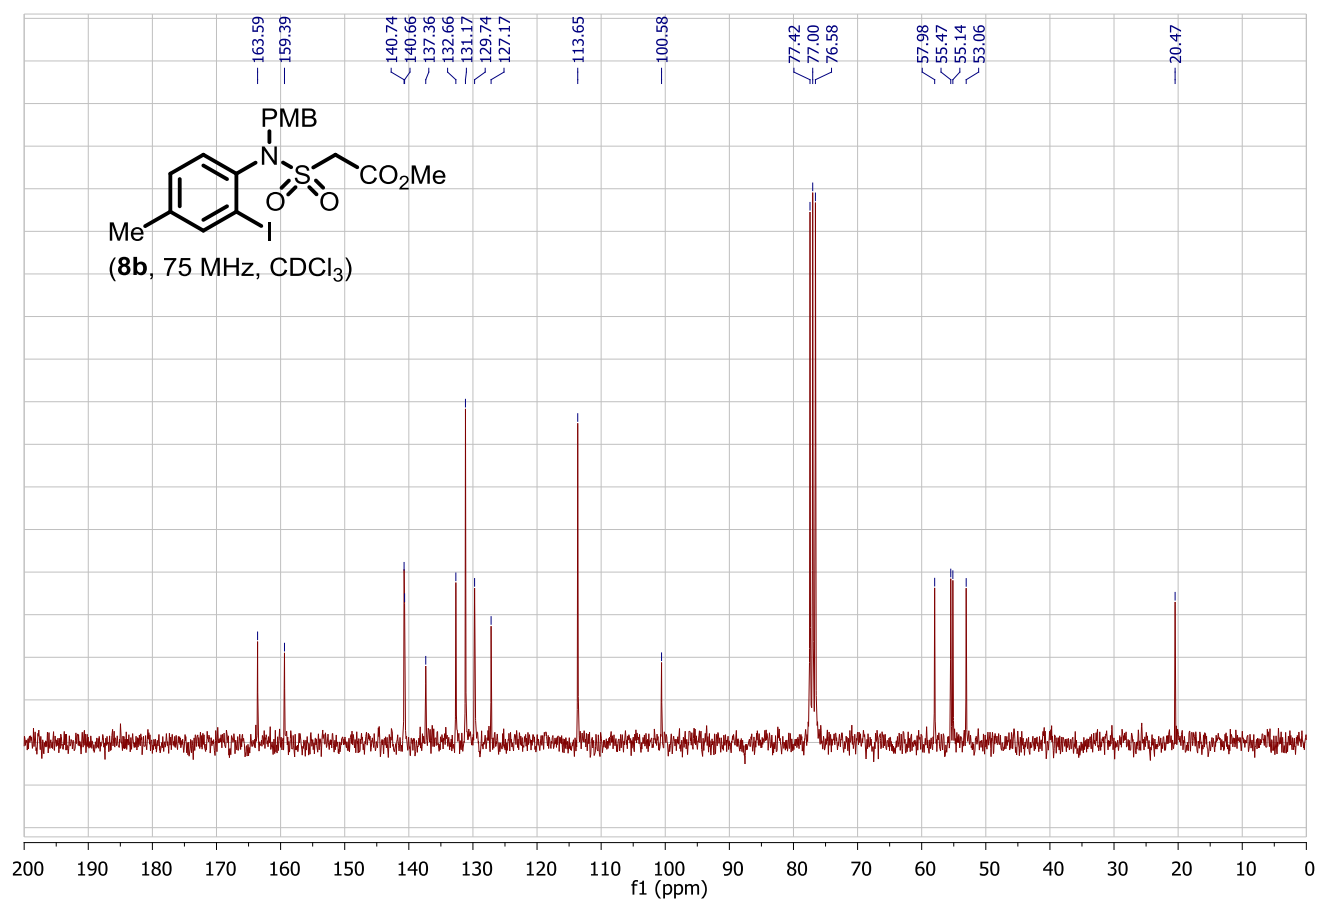

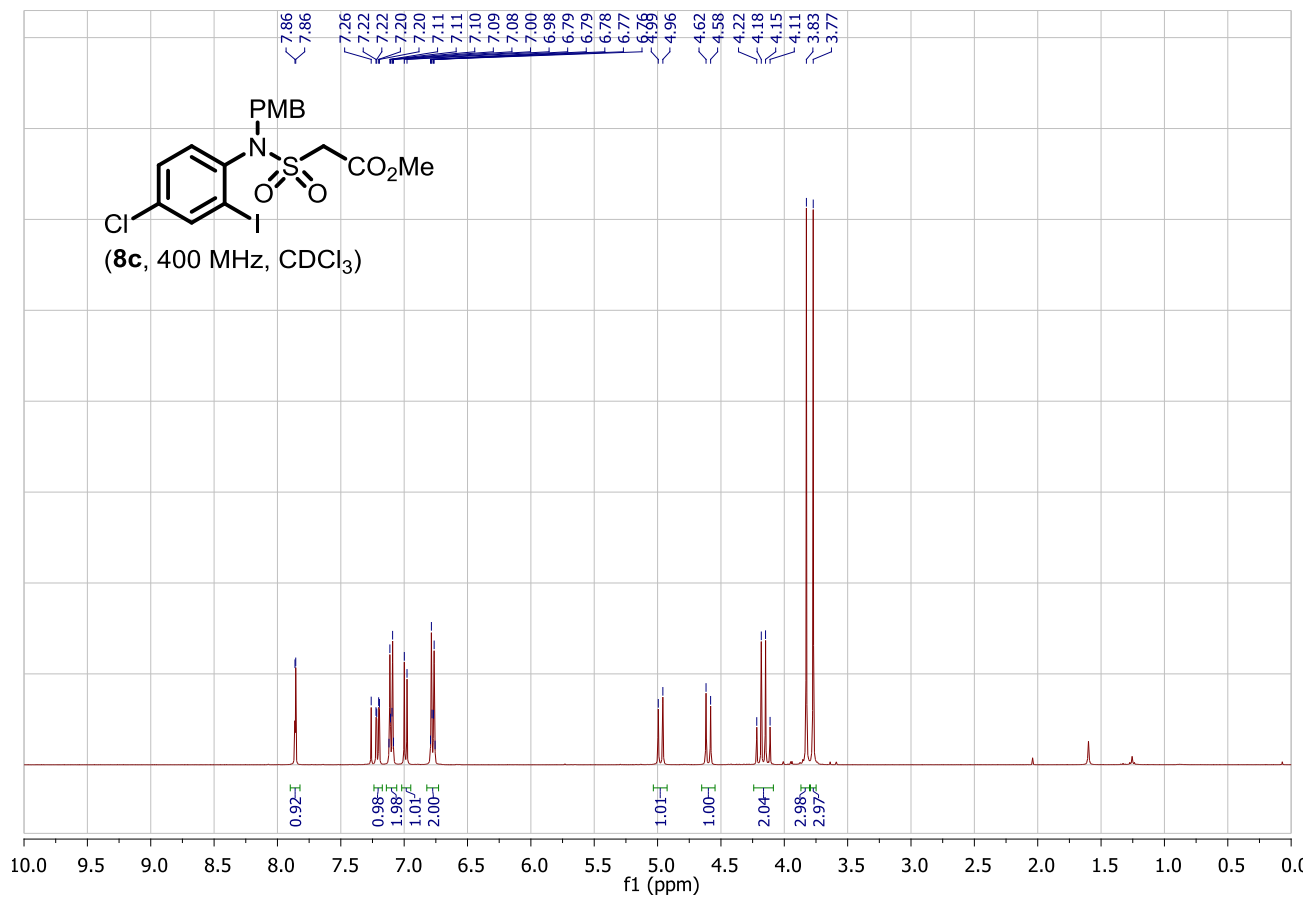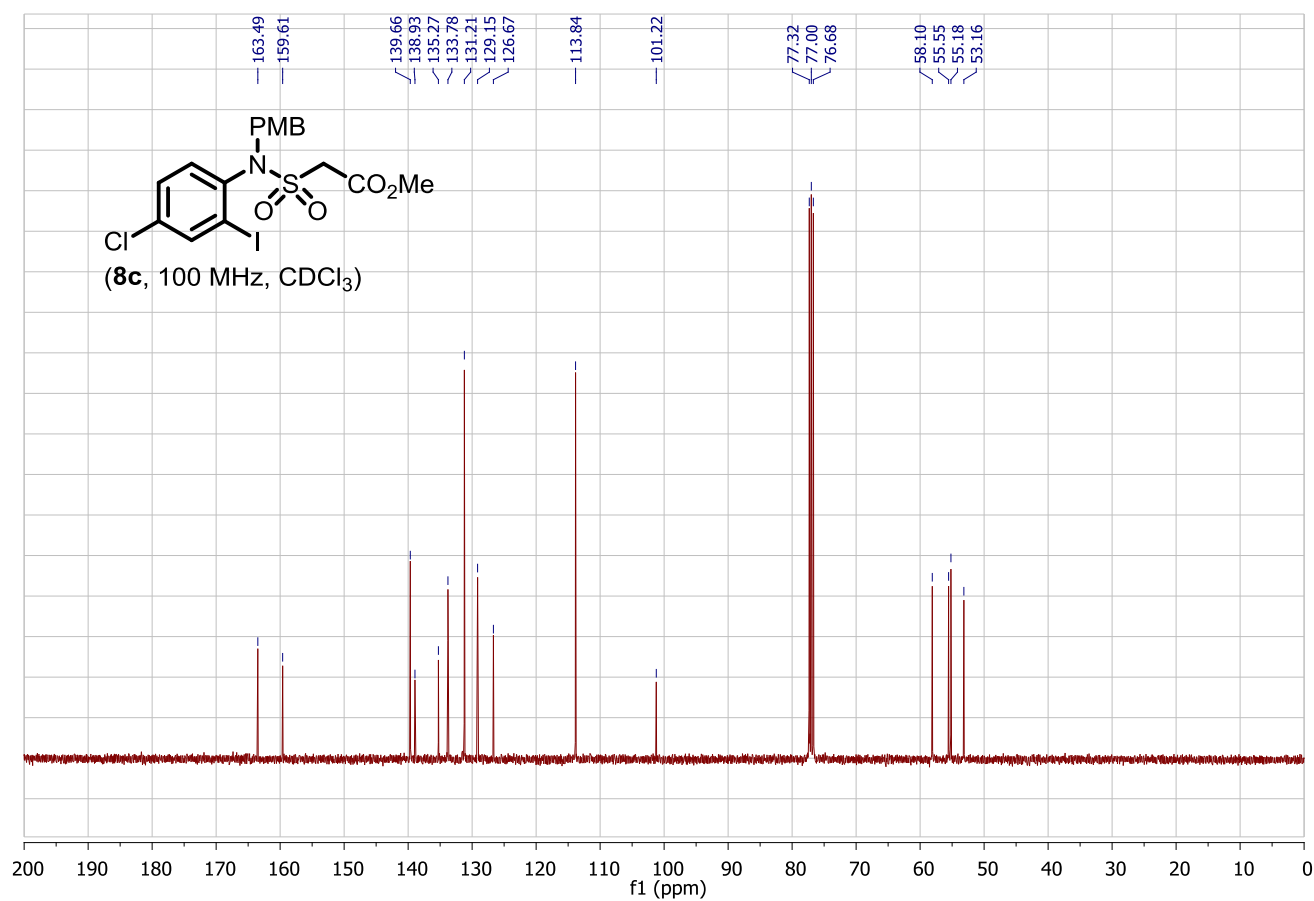

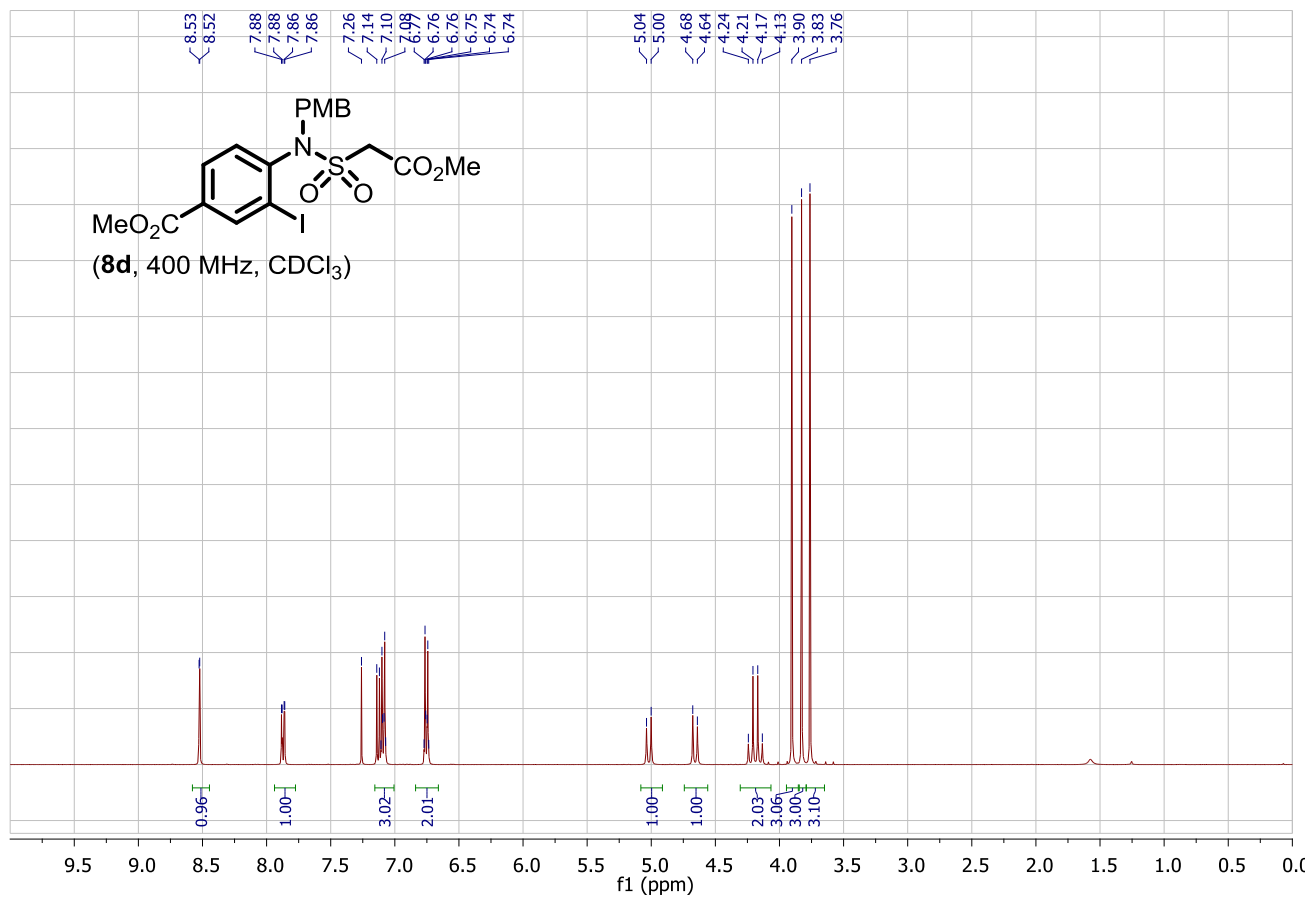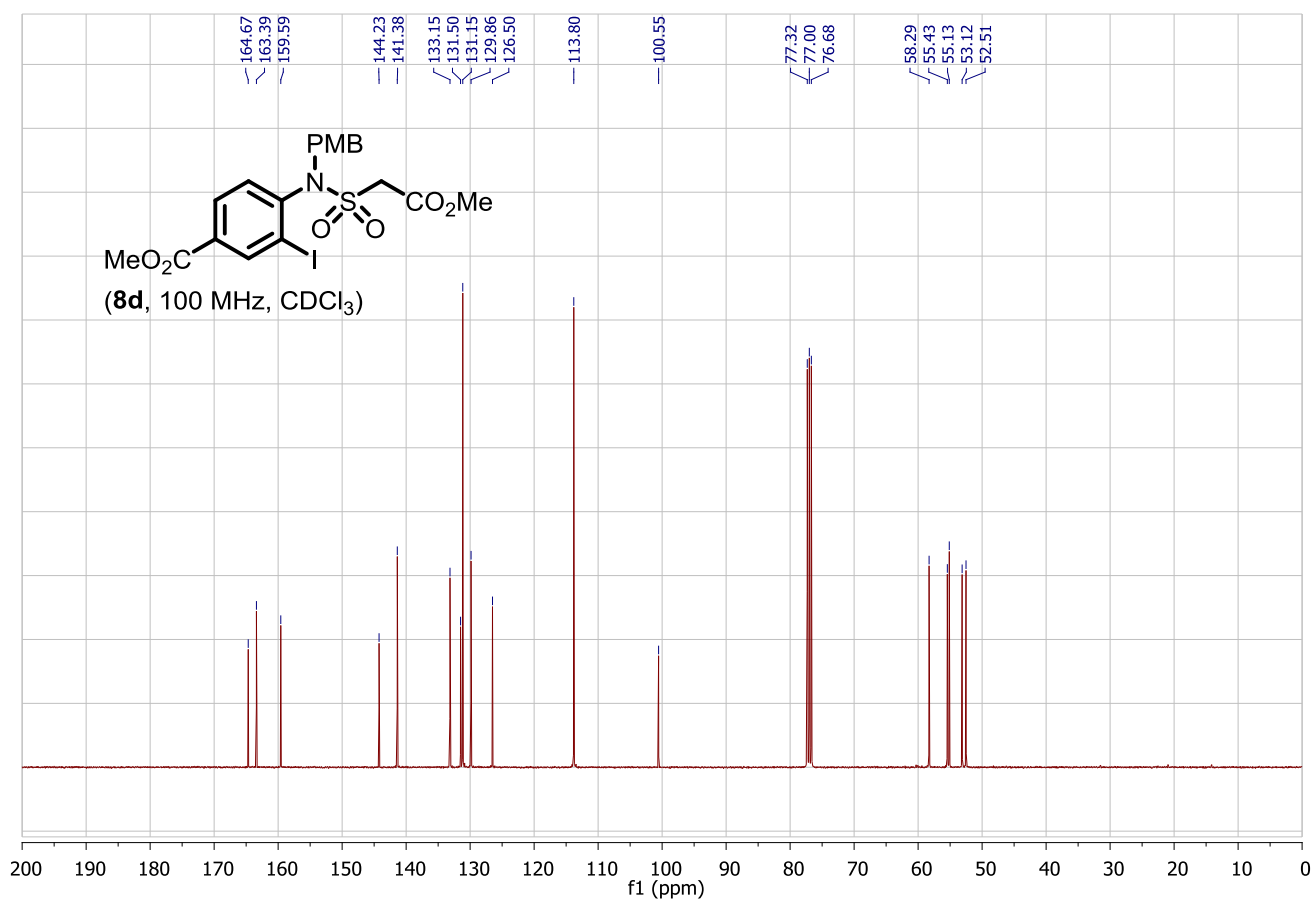



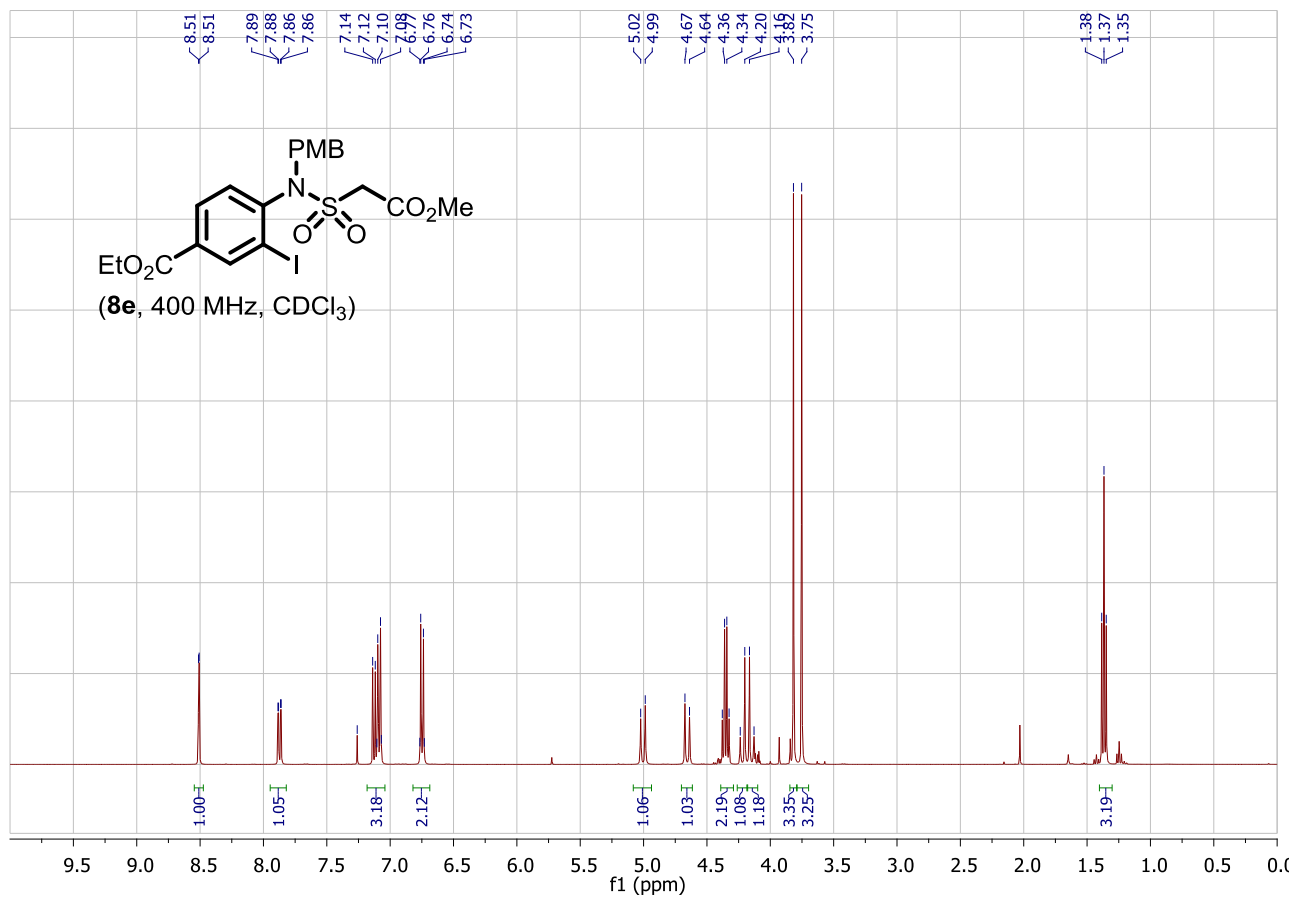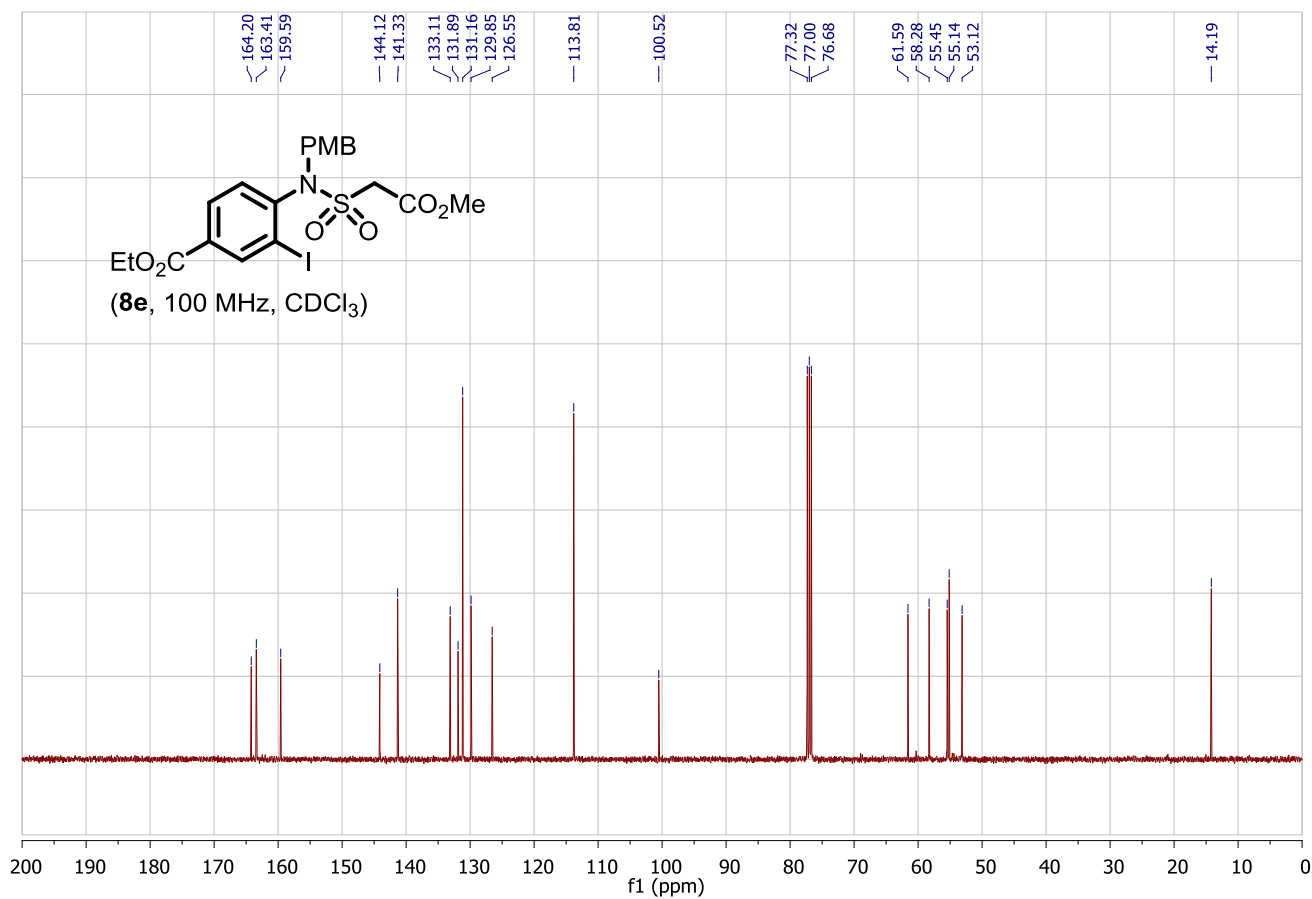

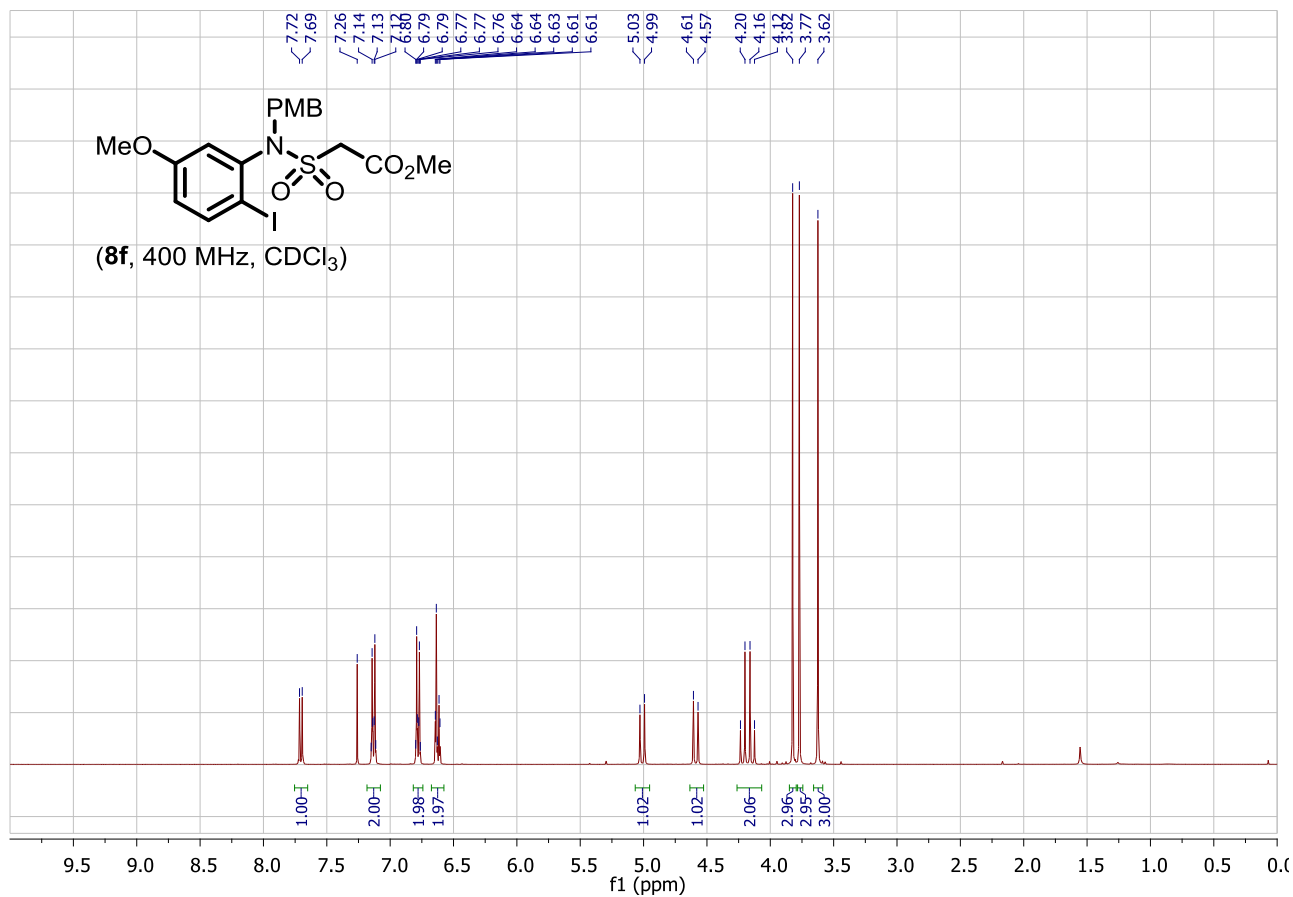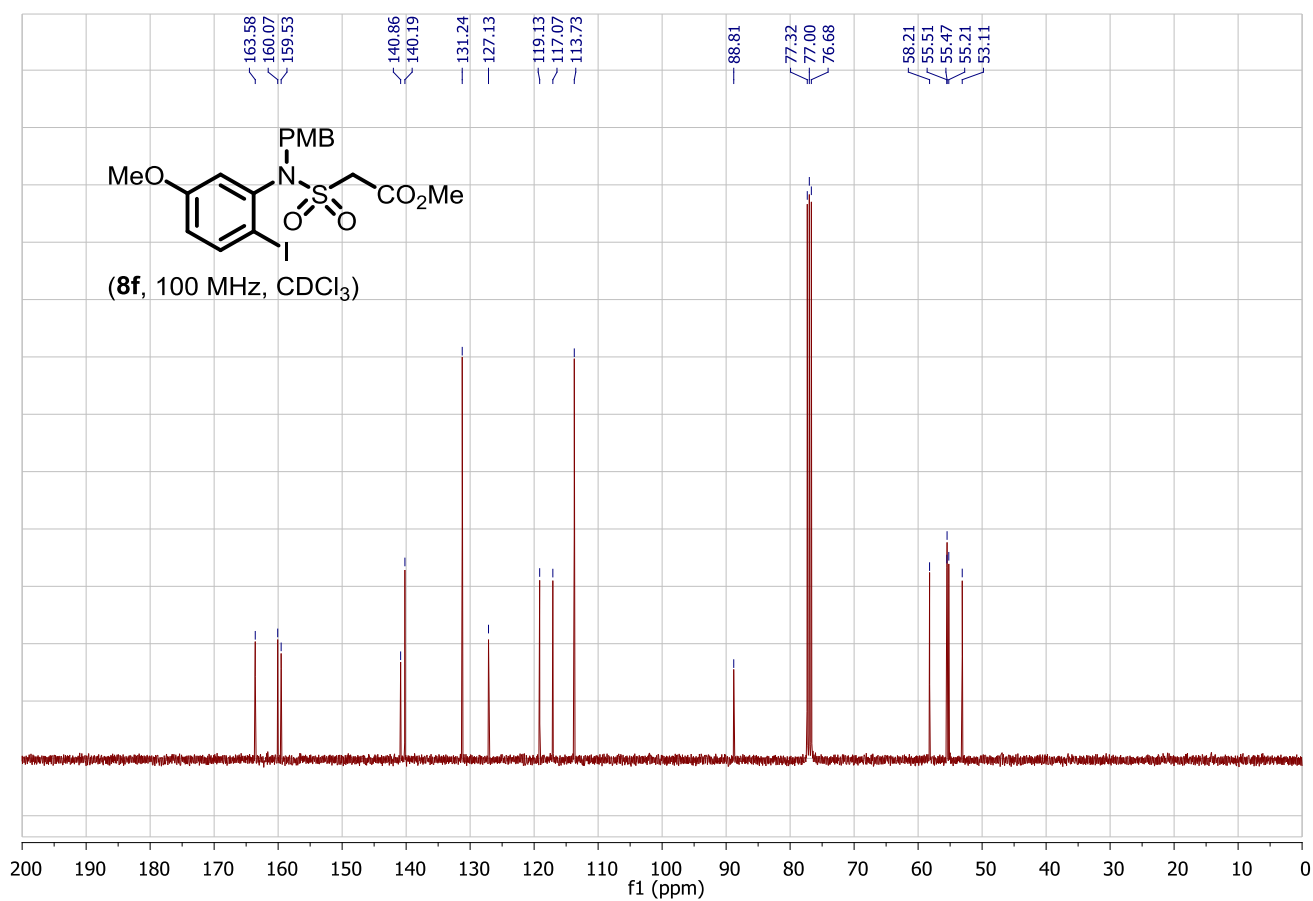

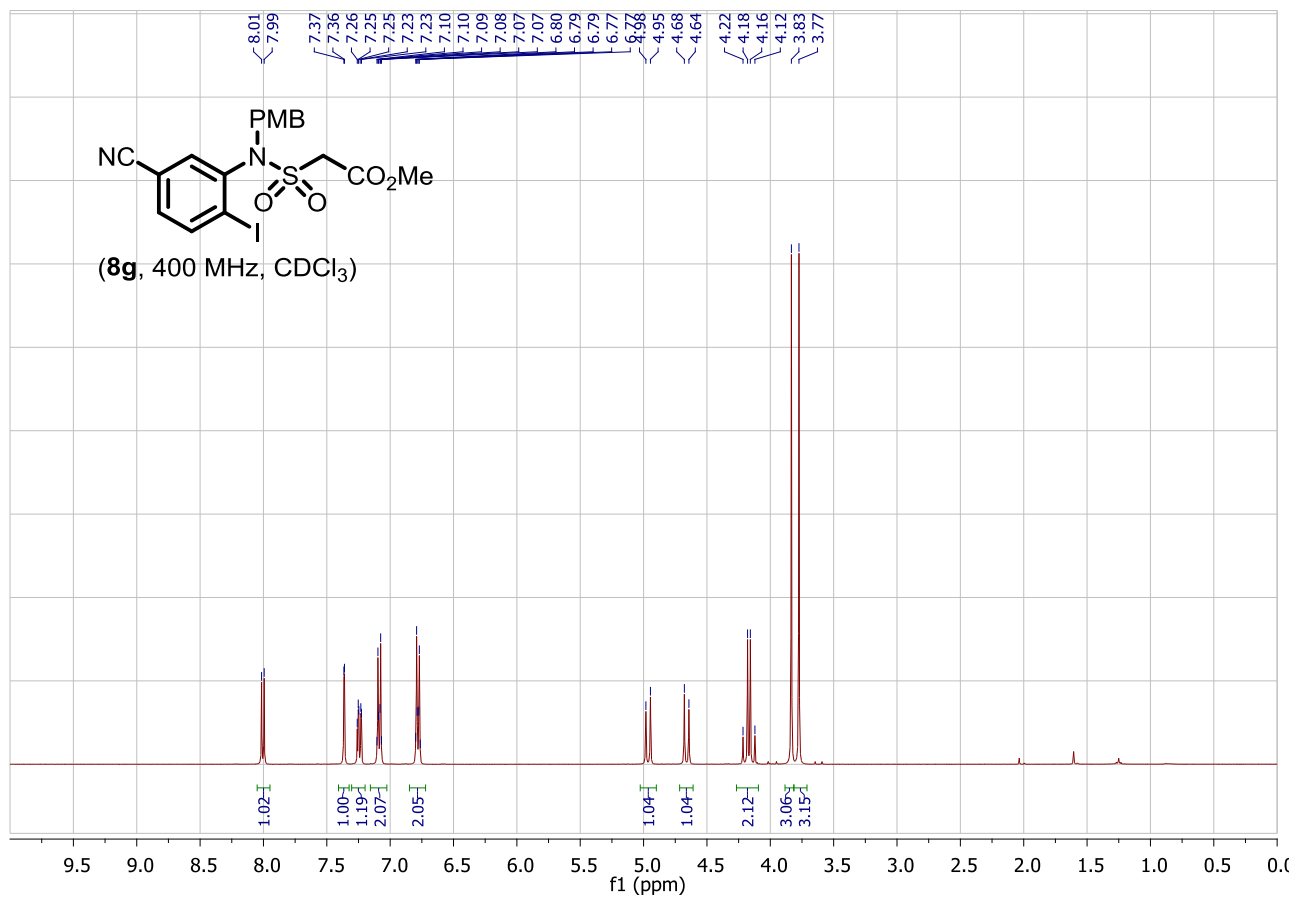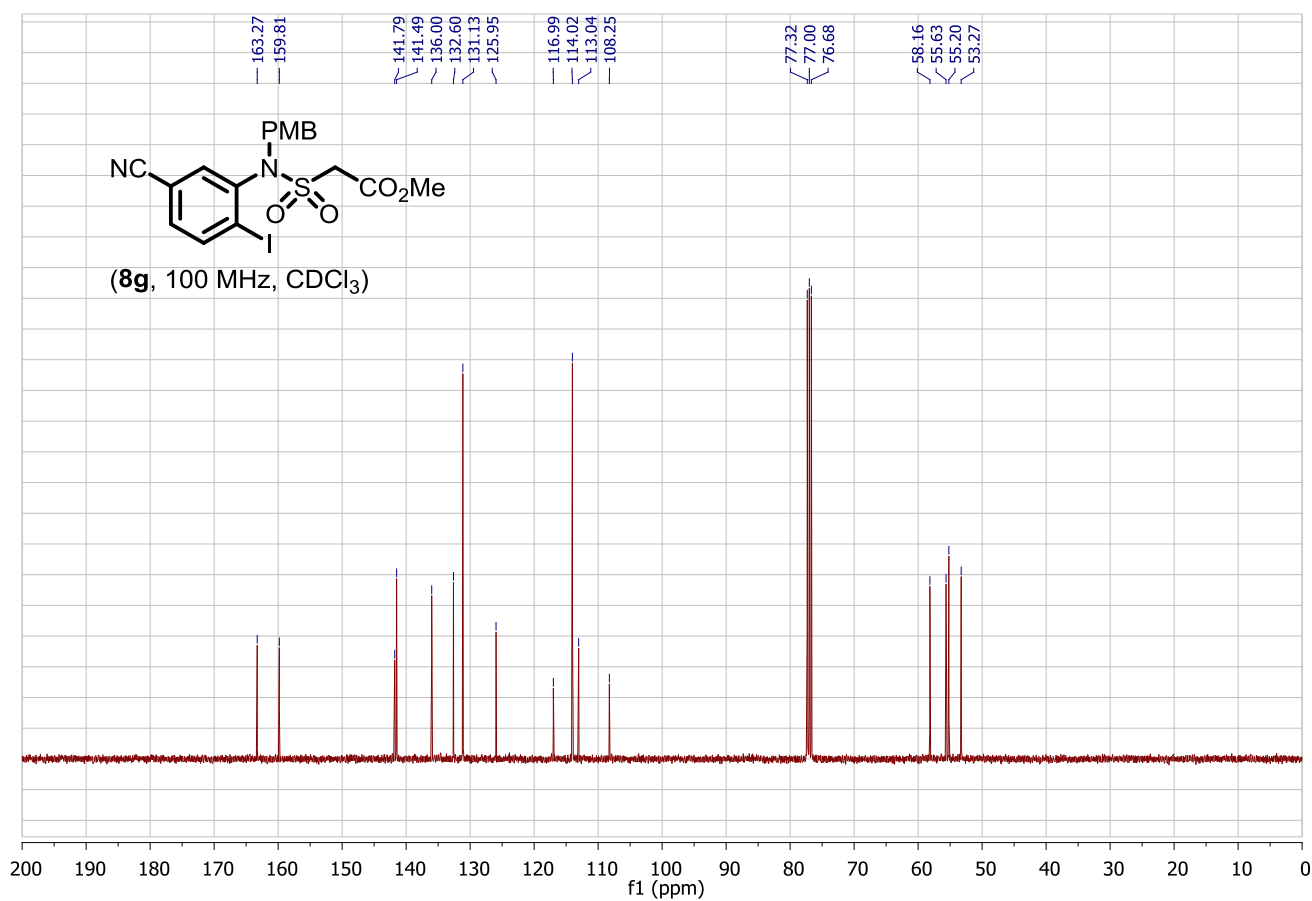

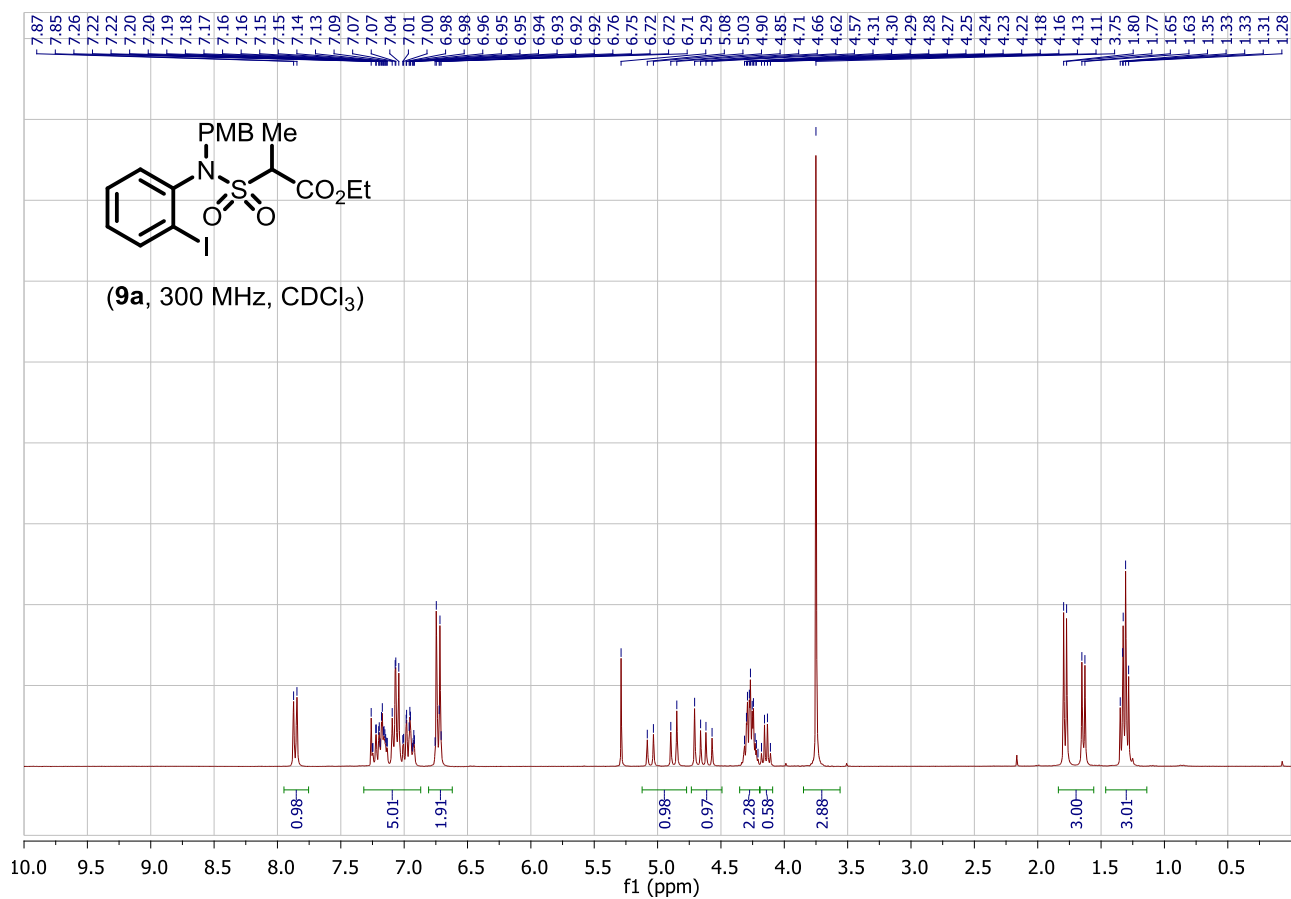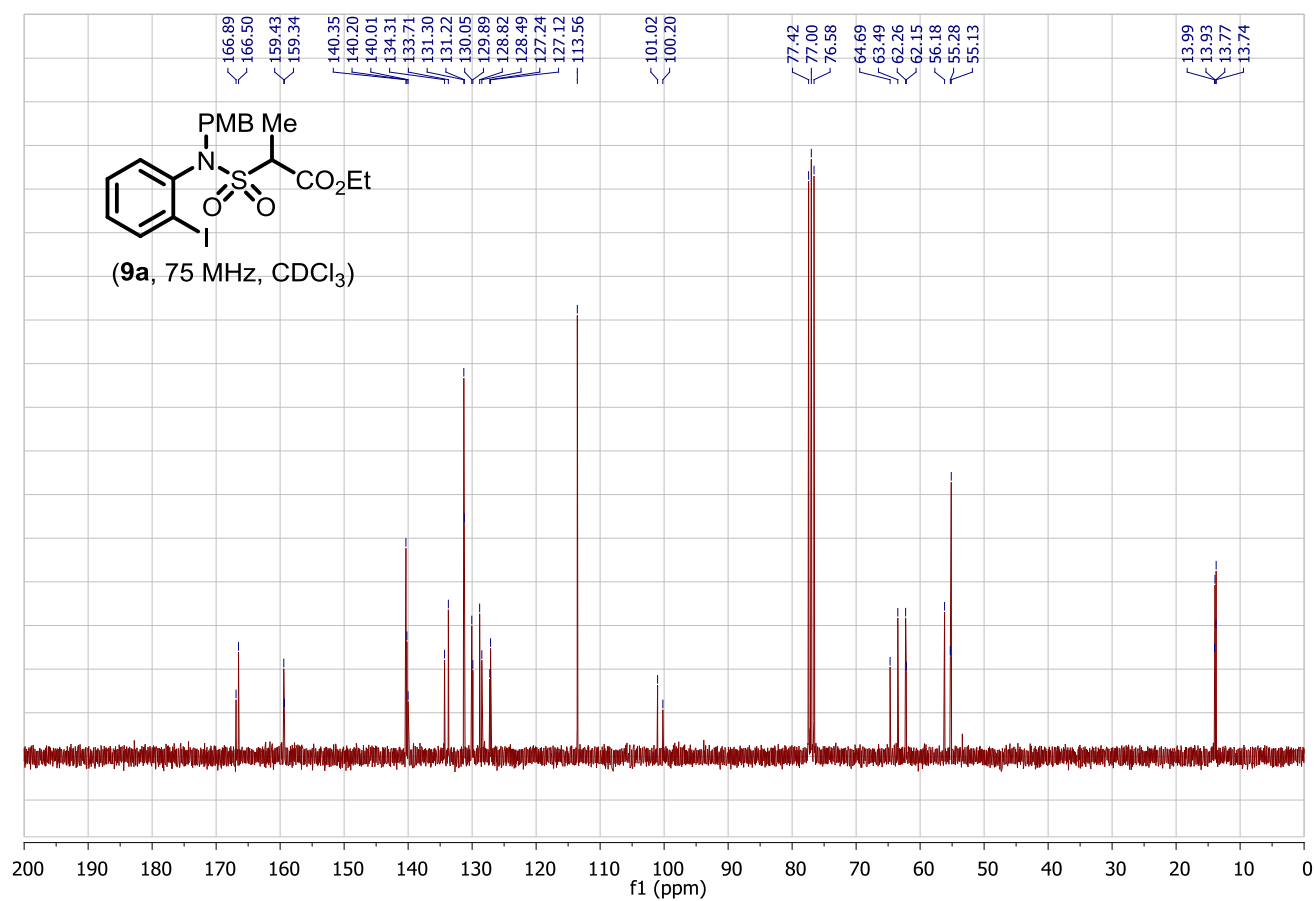

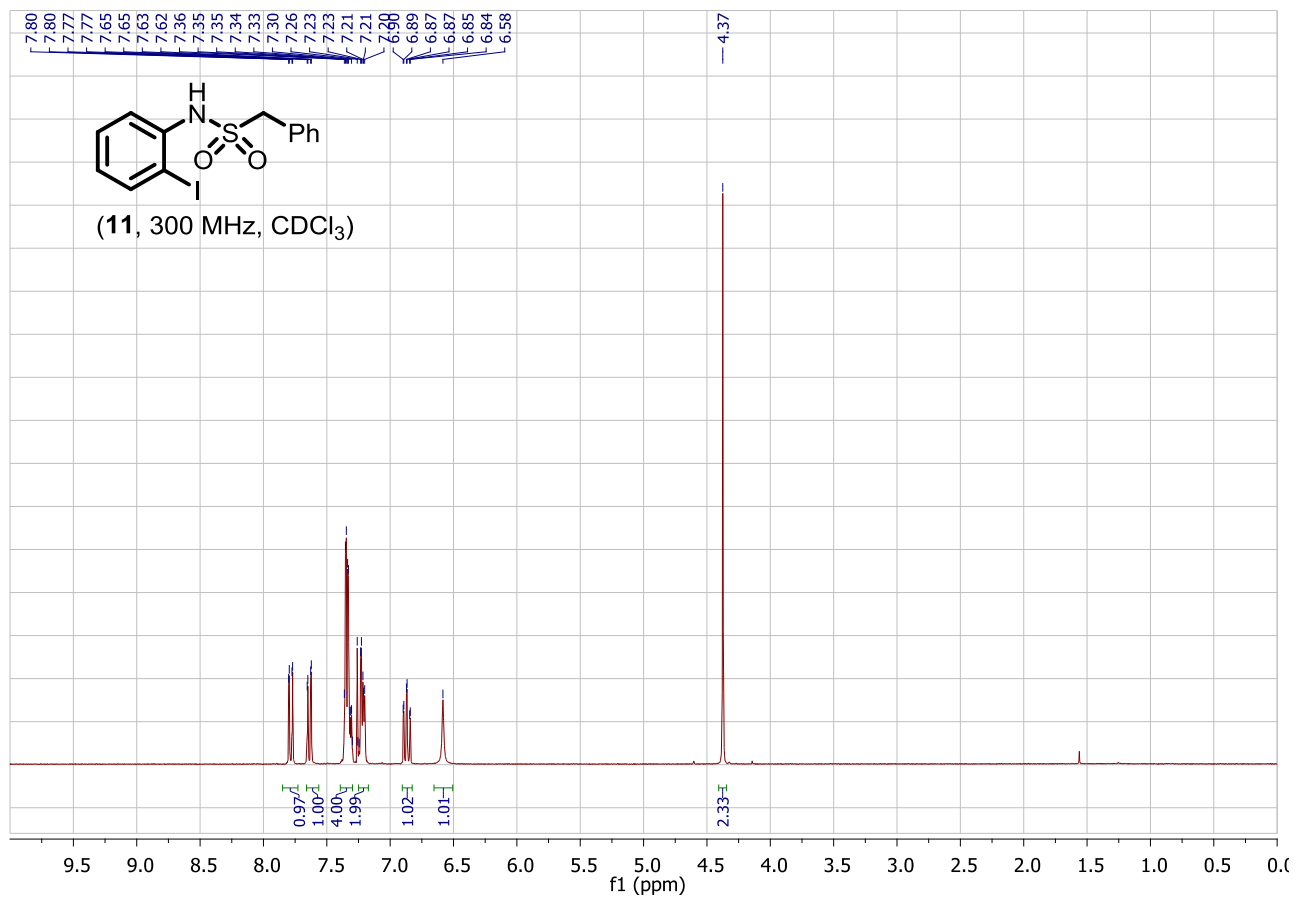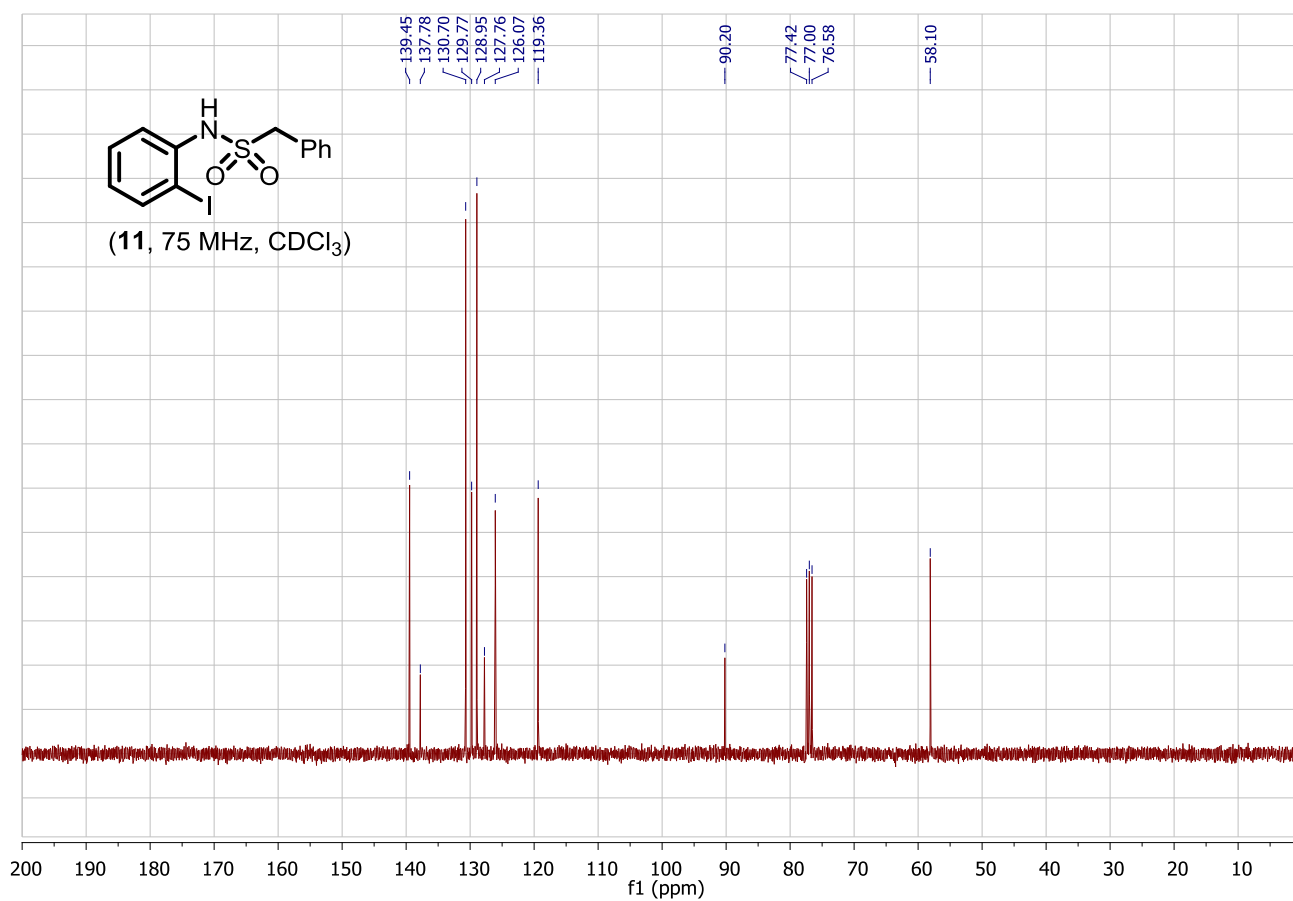

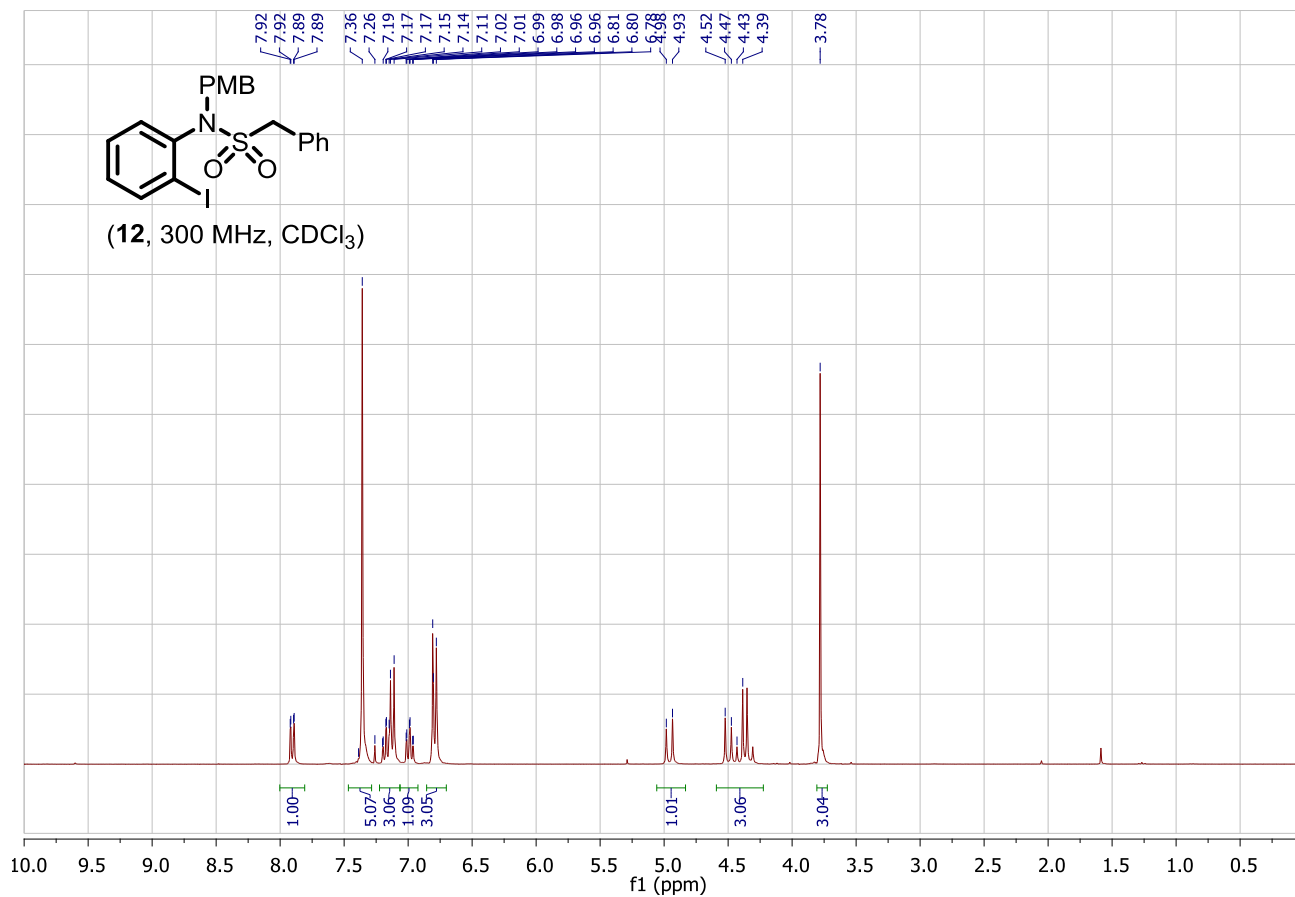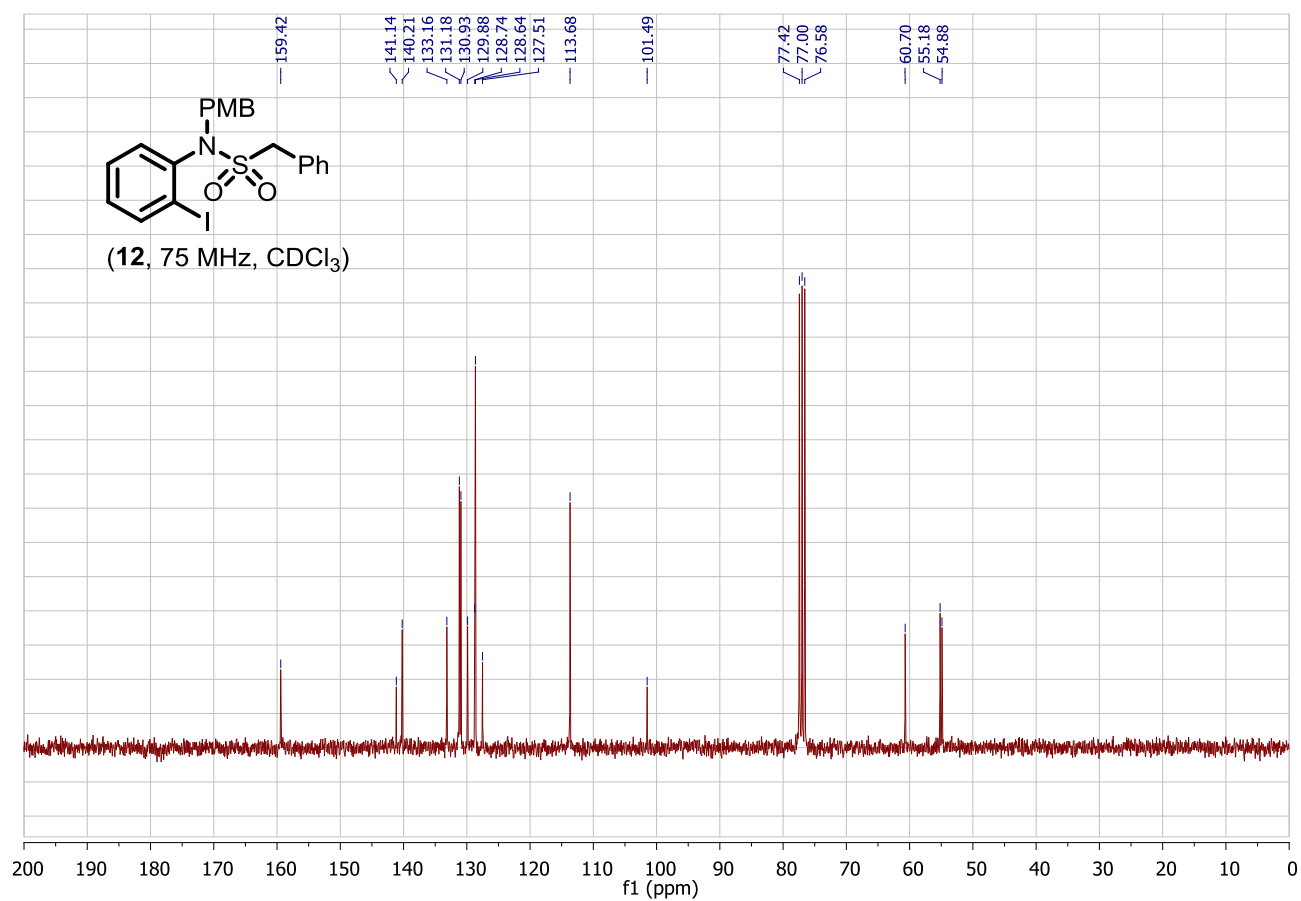

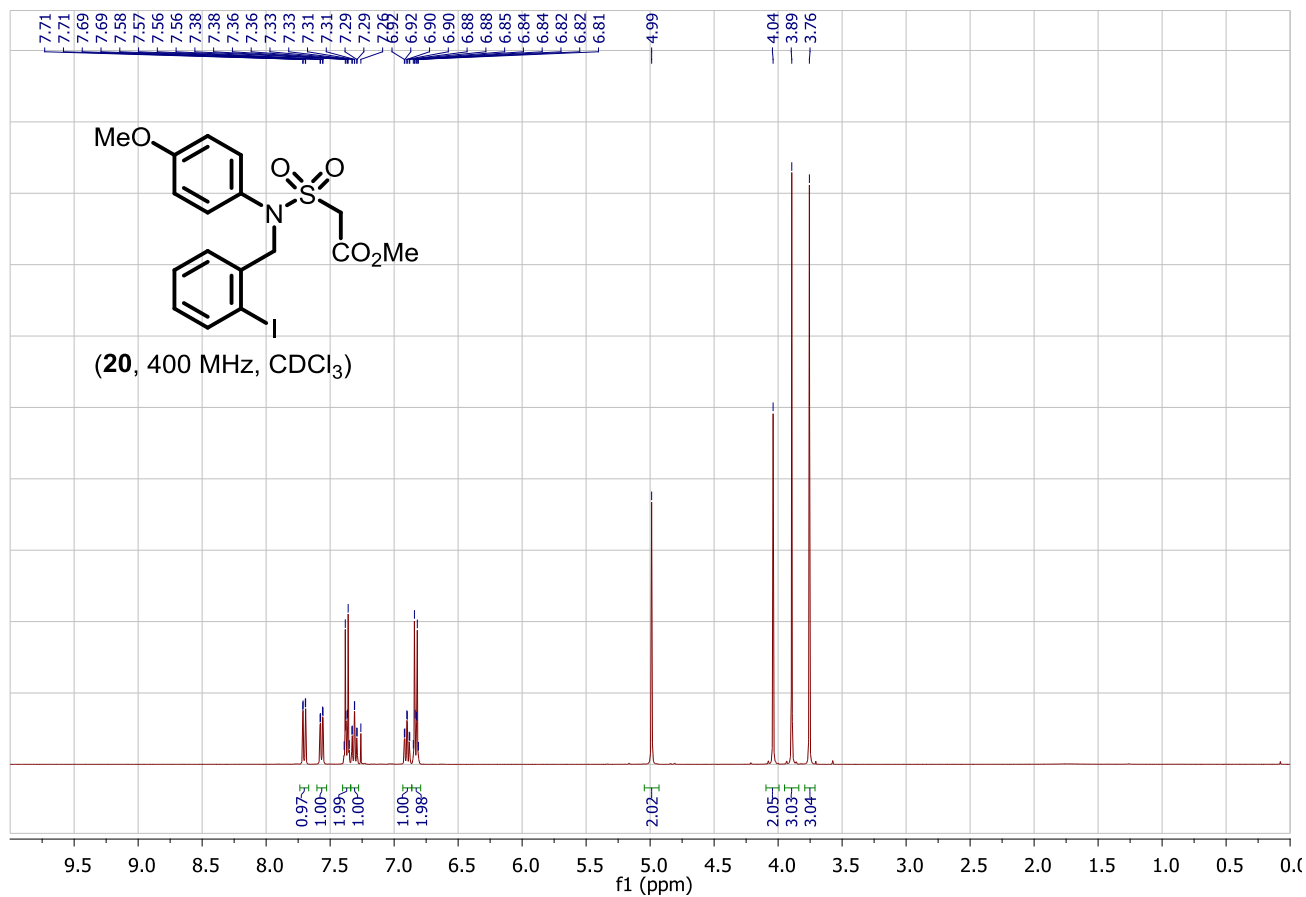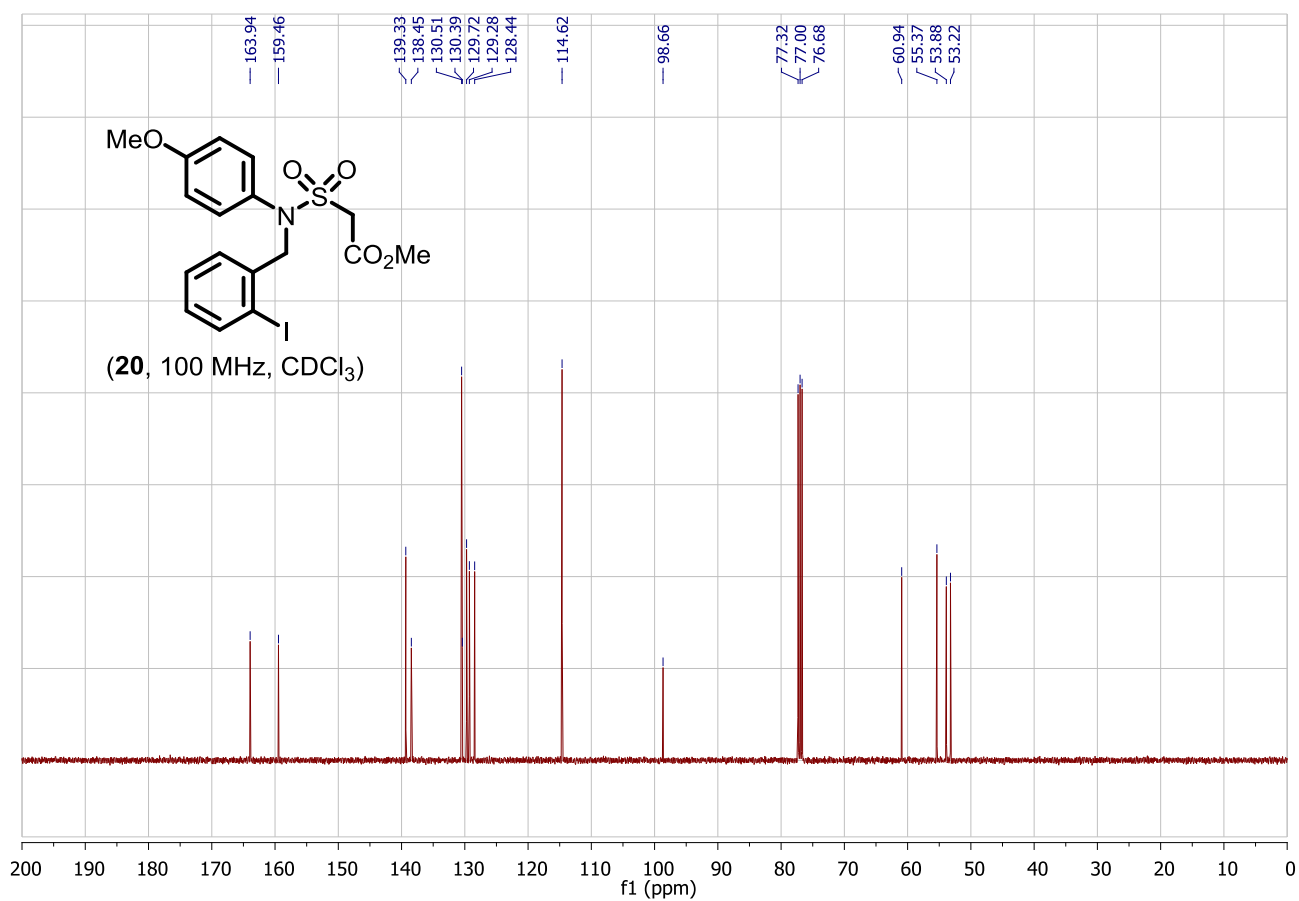

### 3.3. $^1\text{H}$ and $^{13}\text{C}$ NMR spectra of sultams

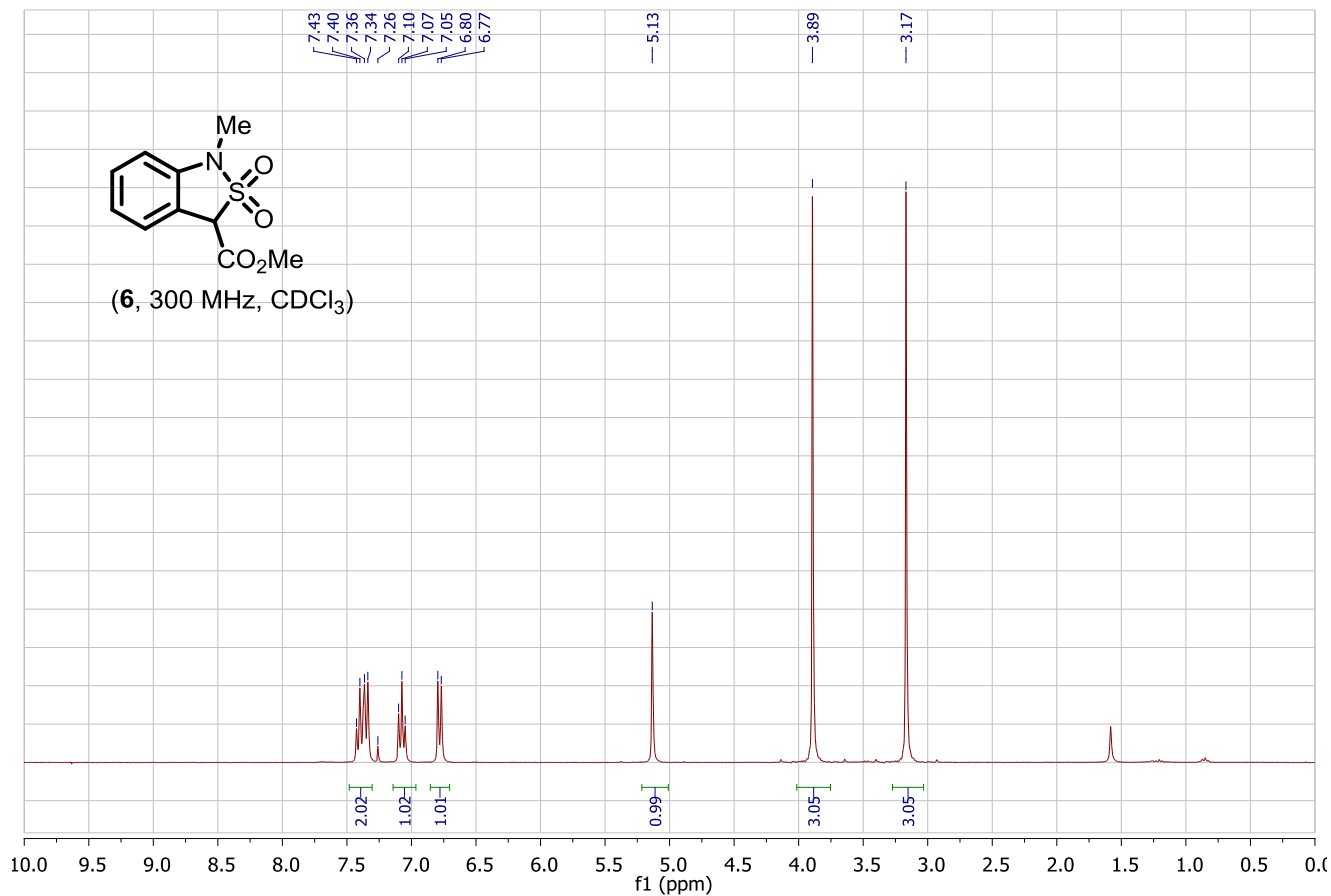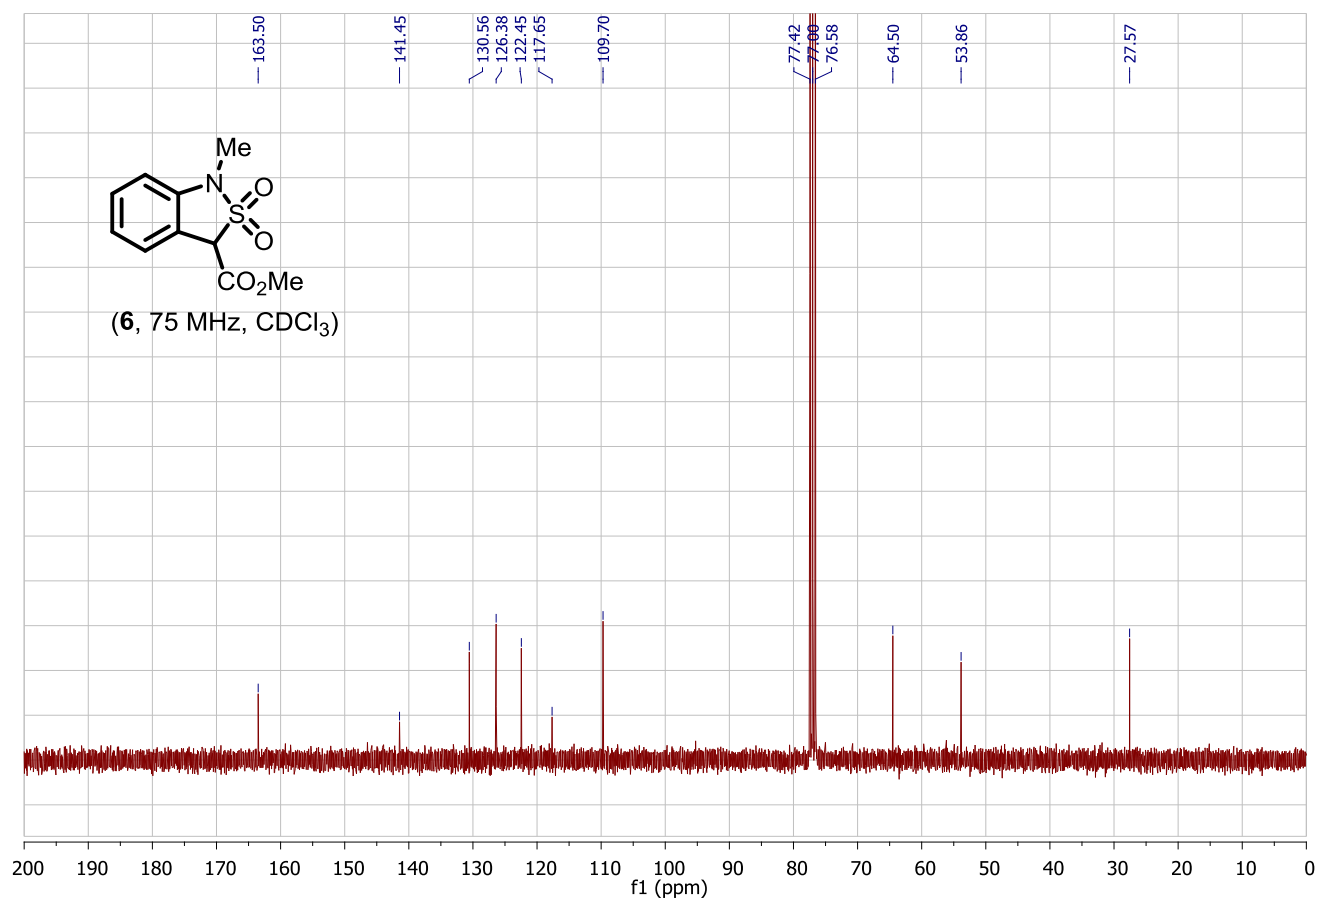



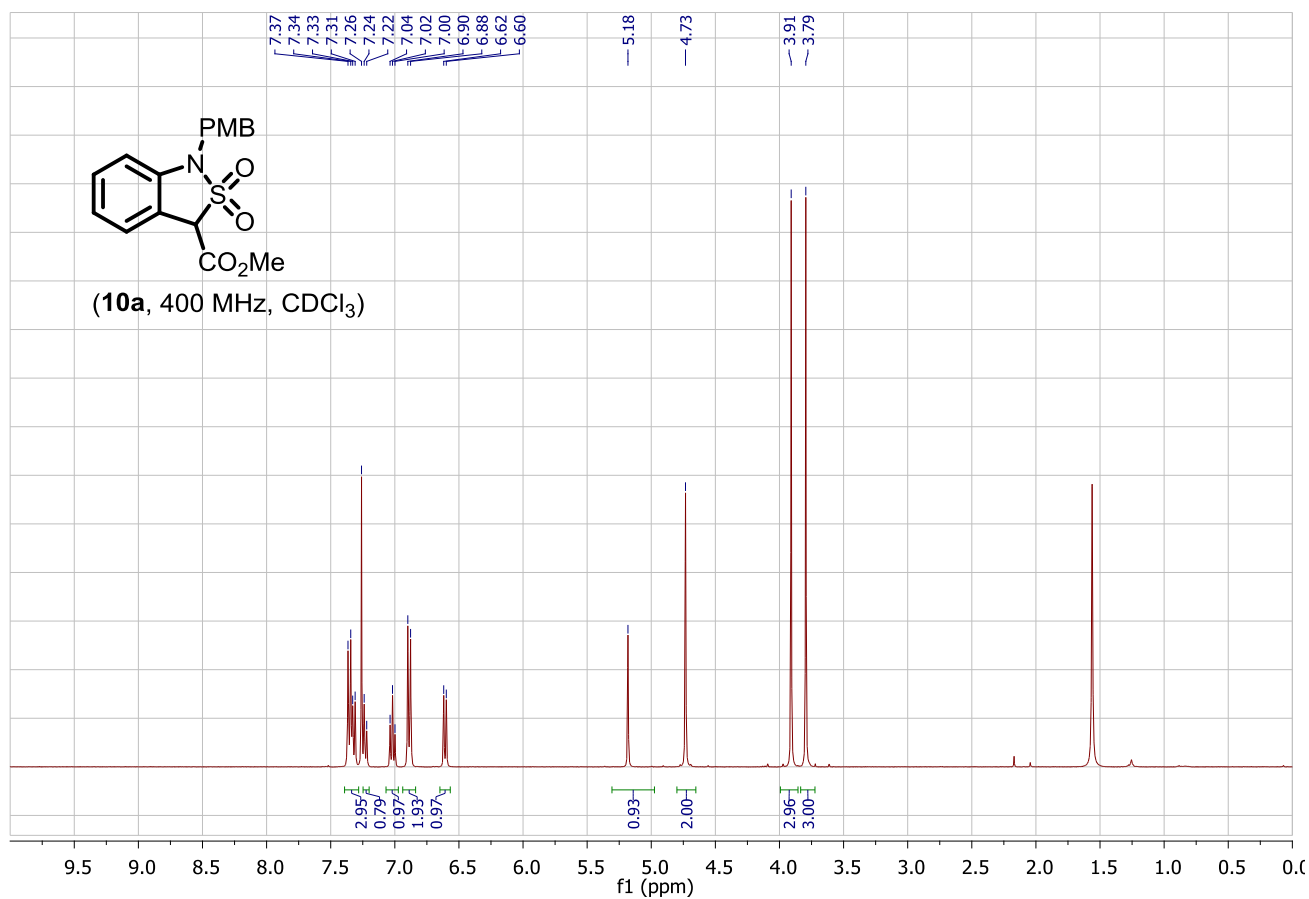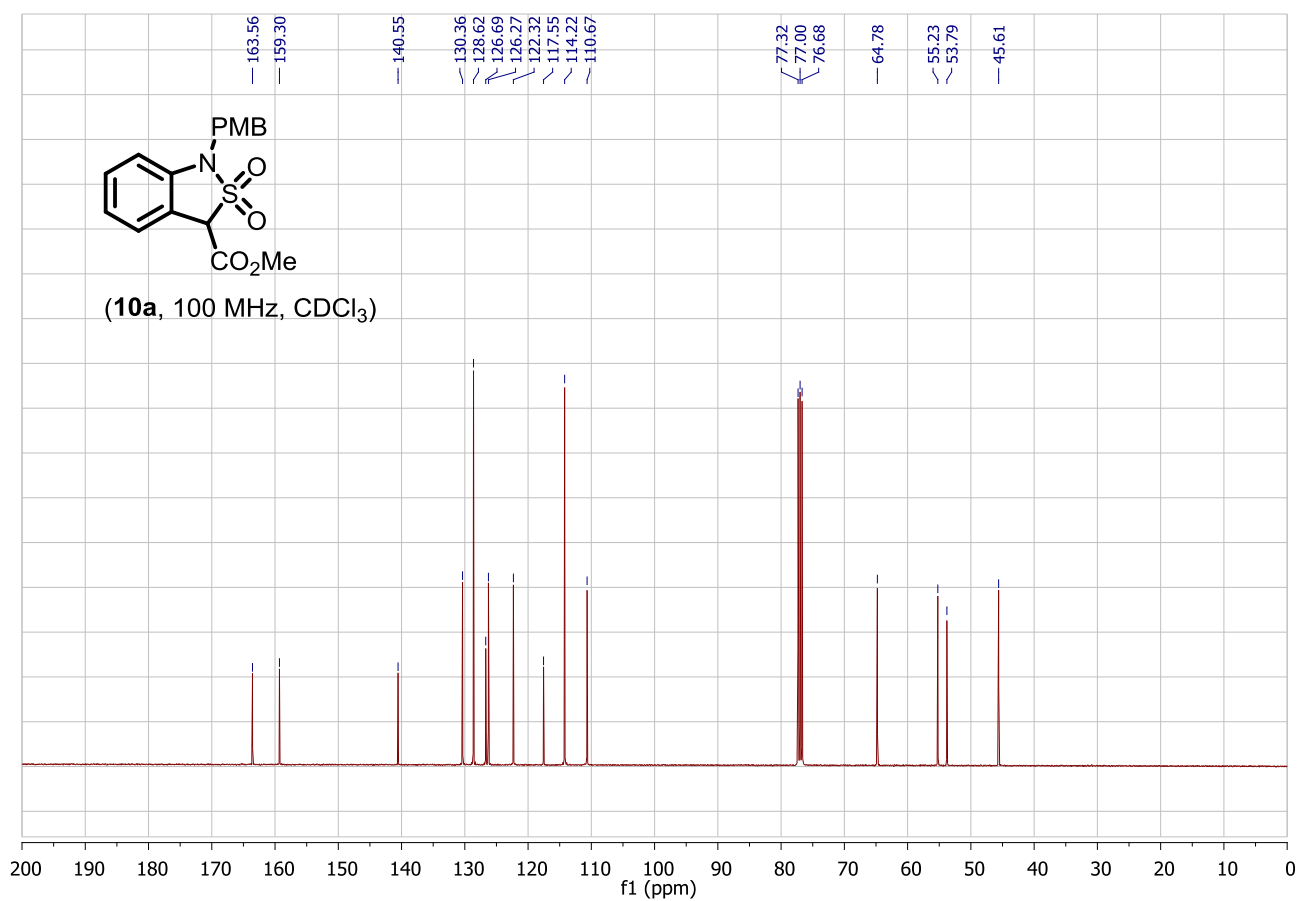

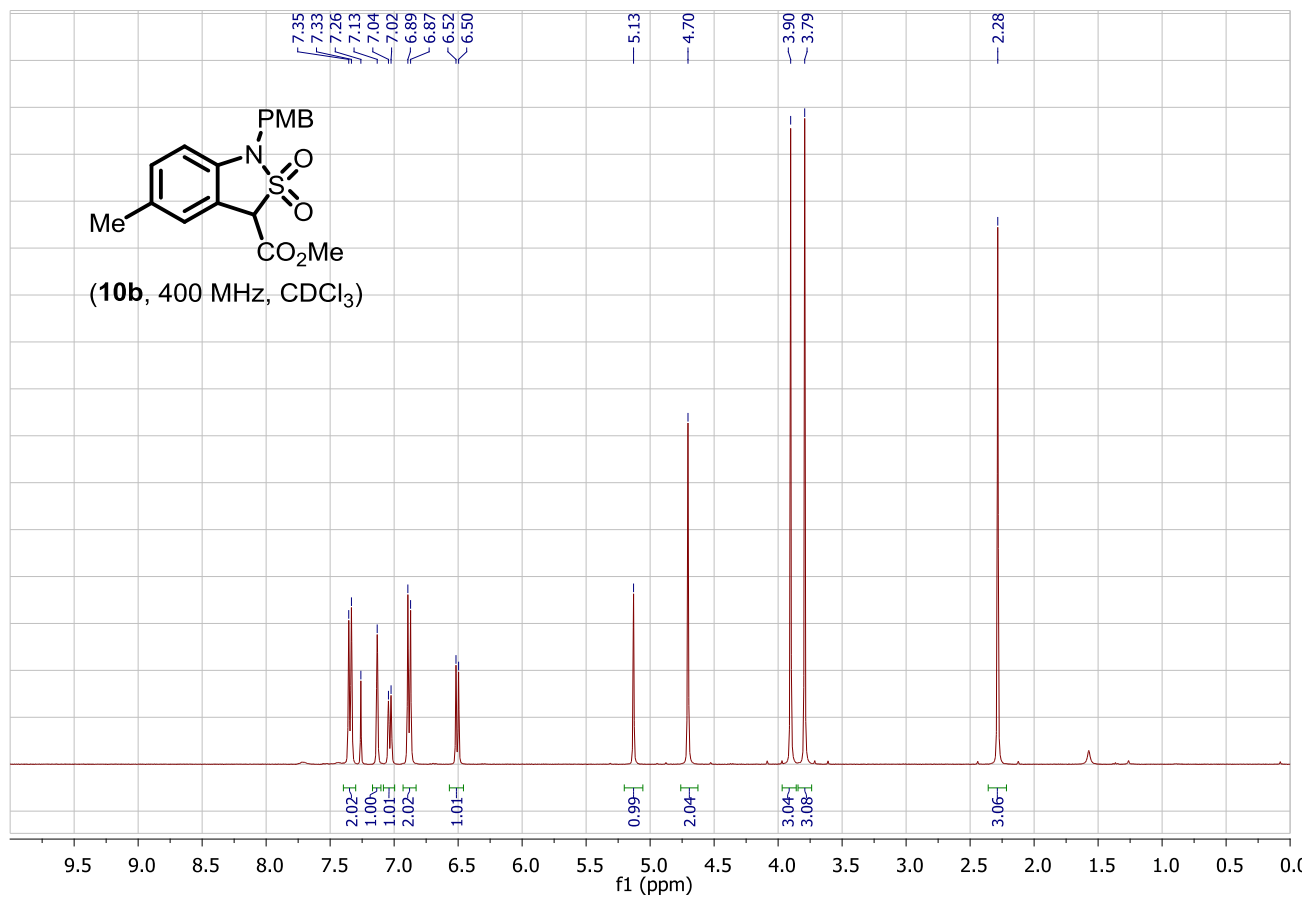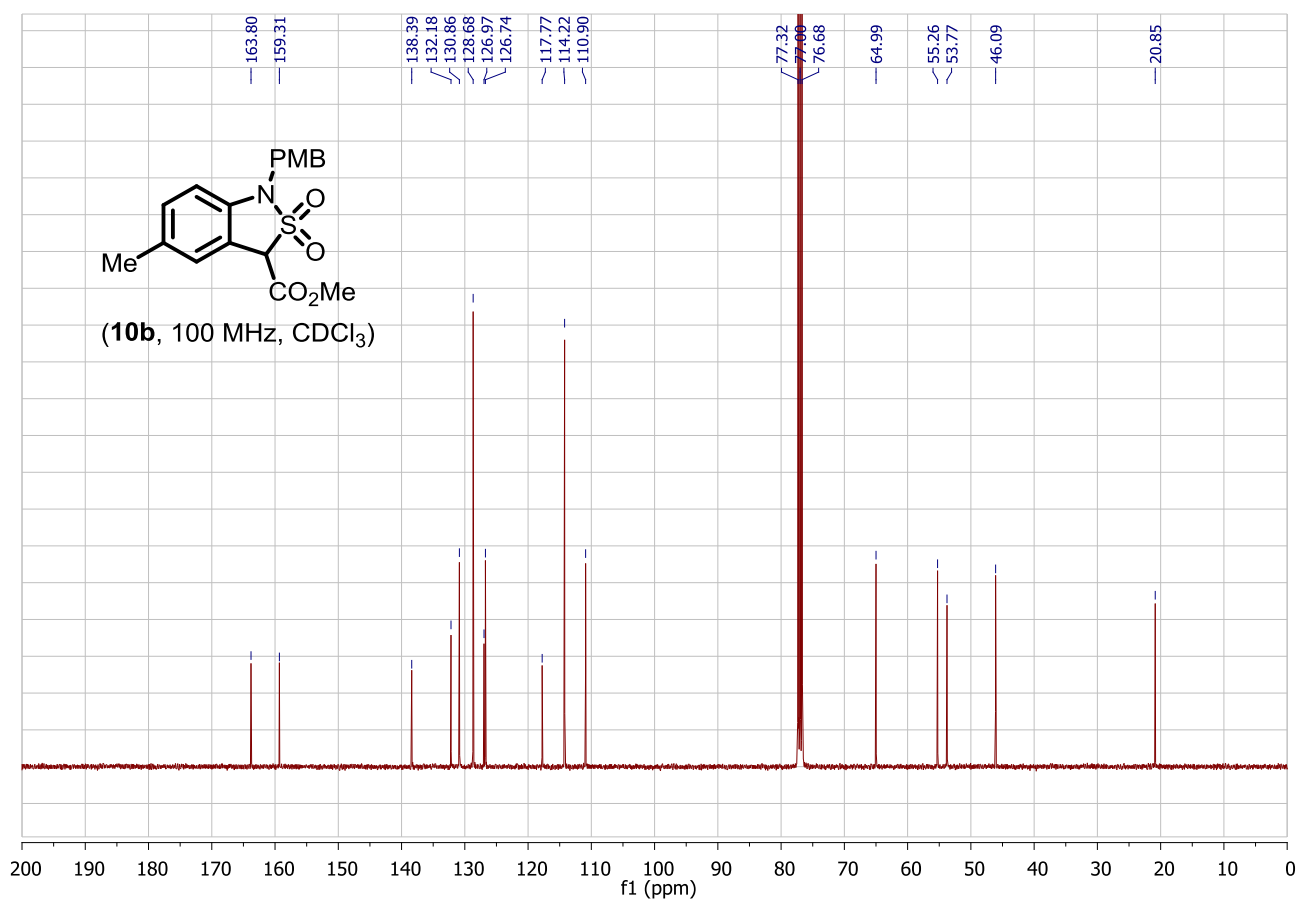

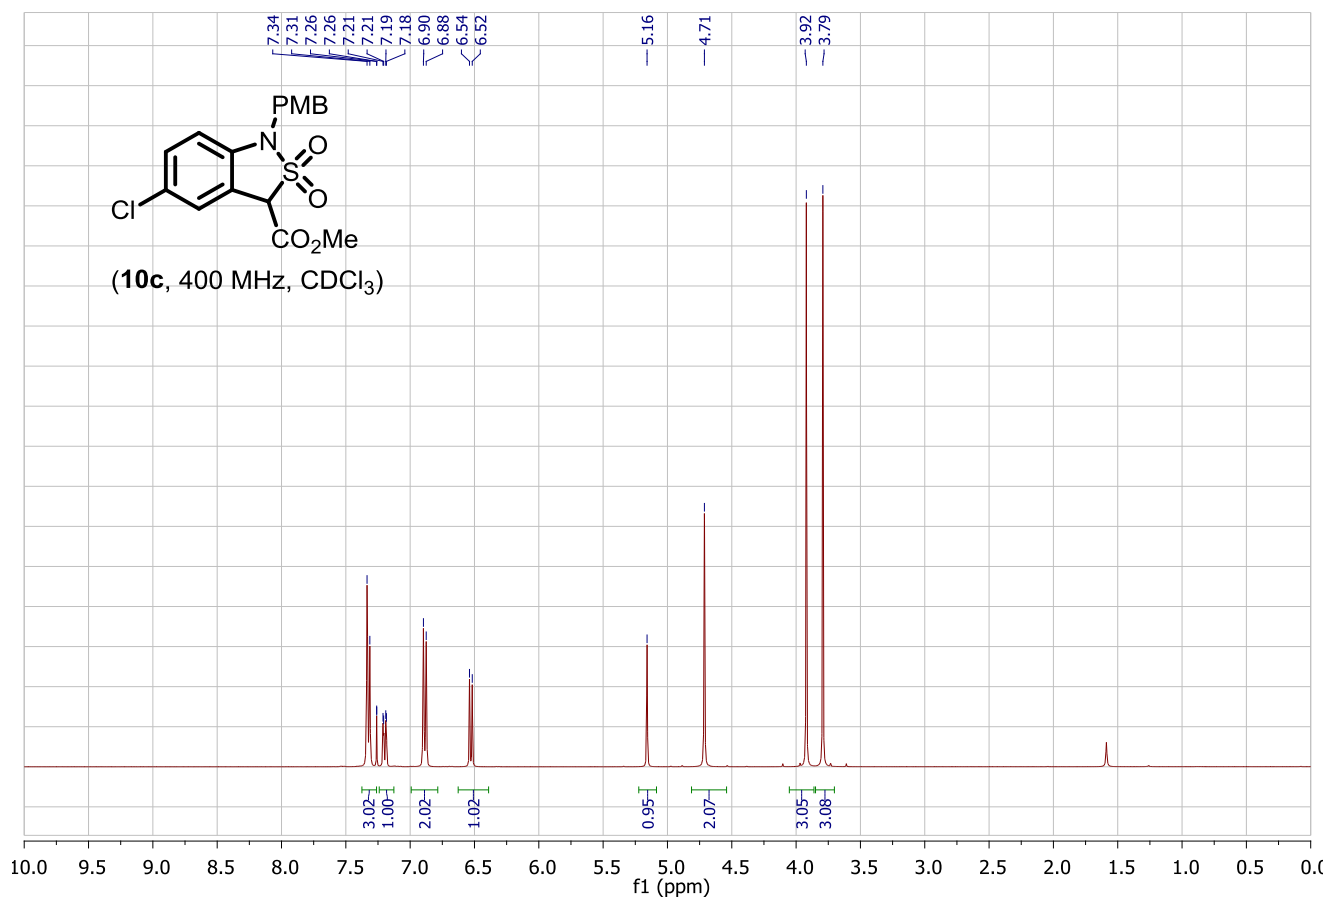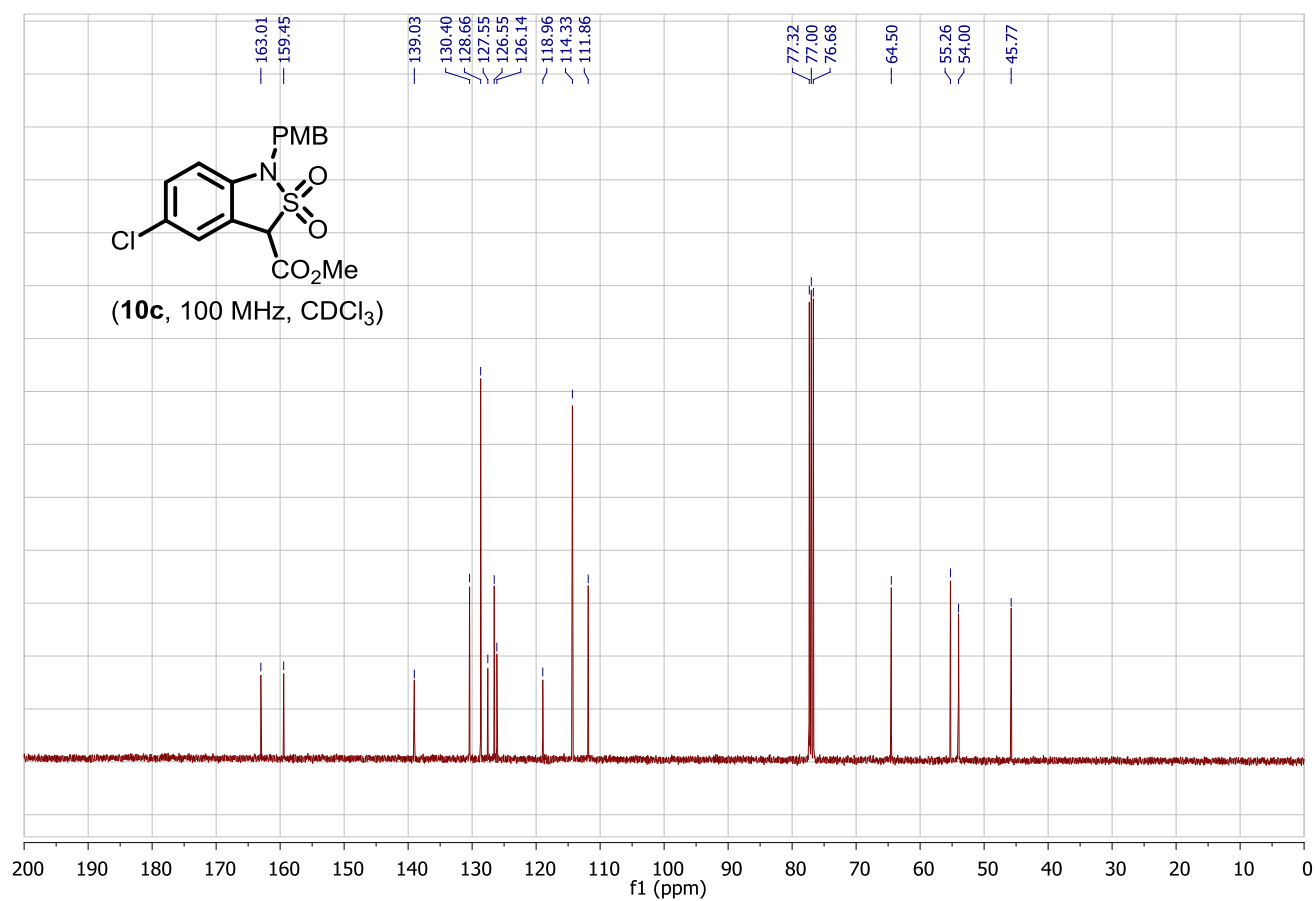

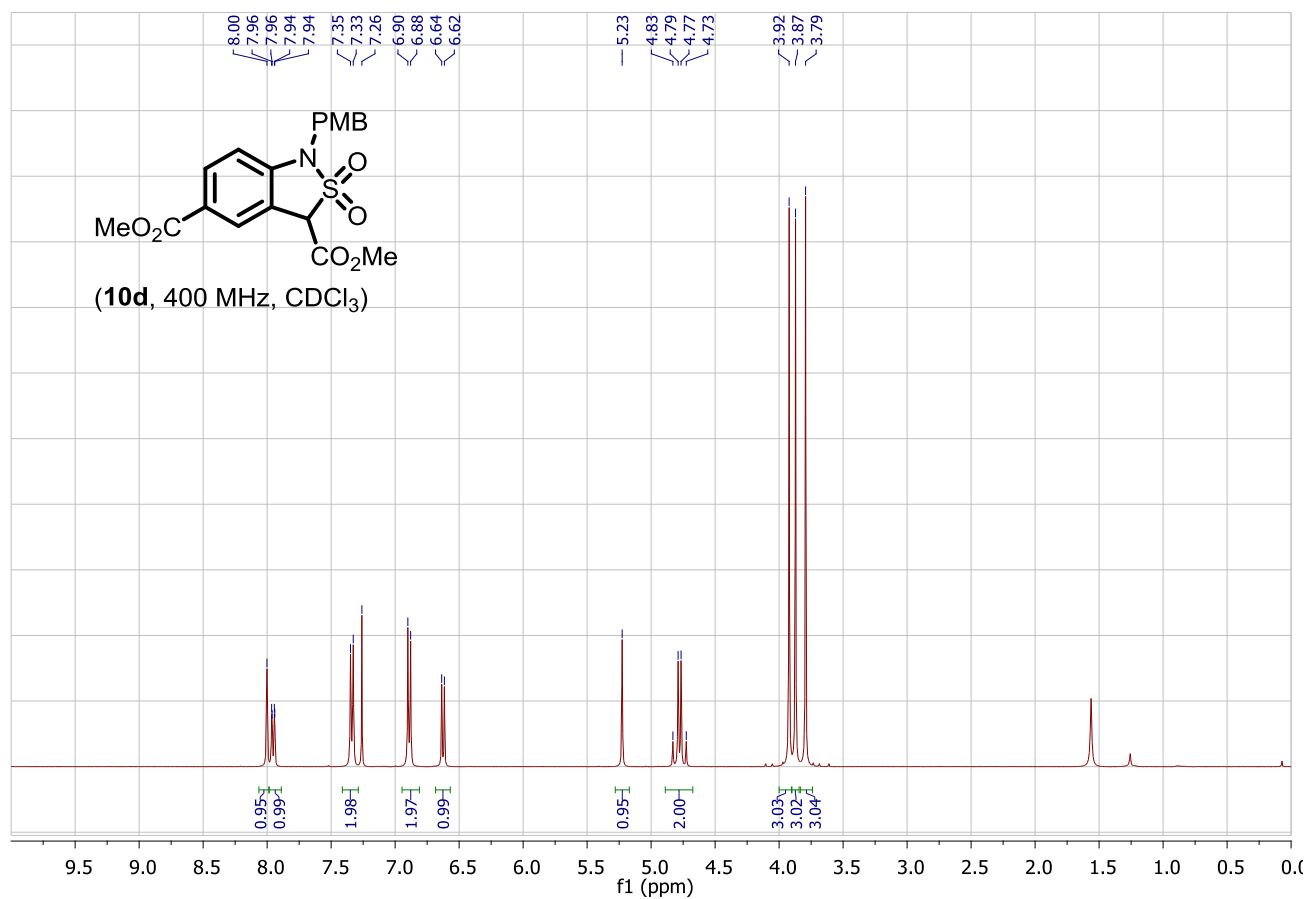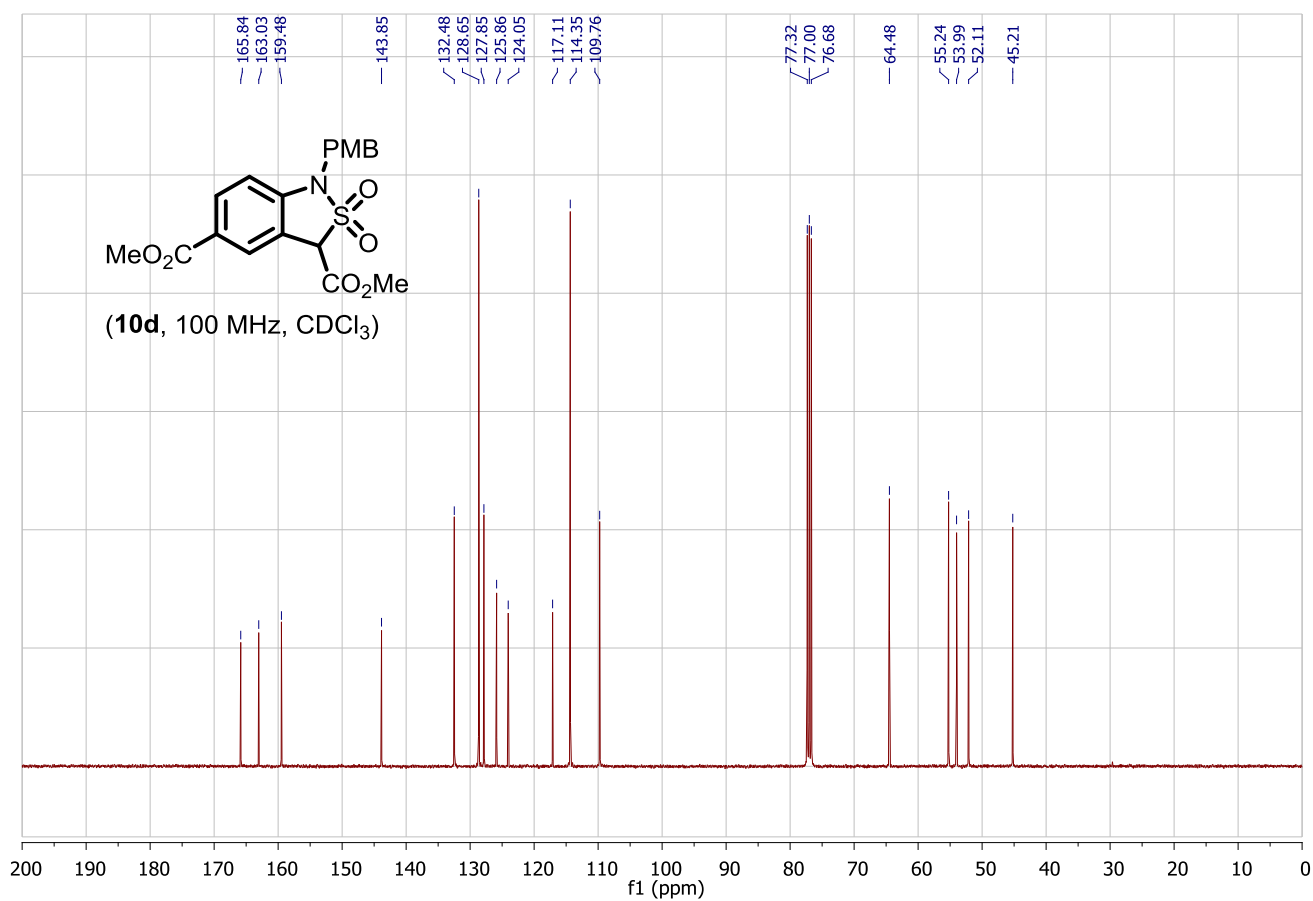

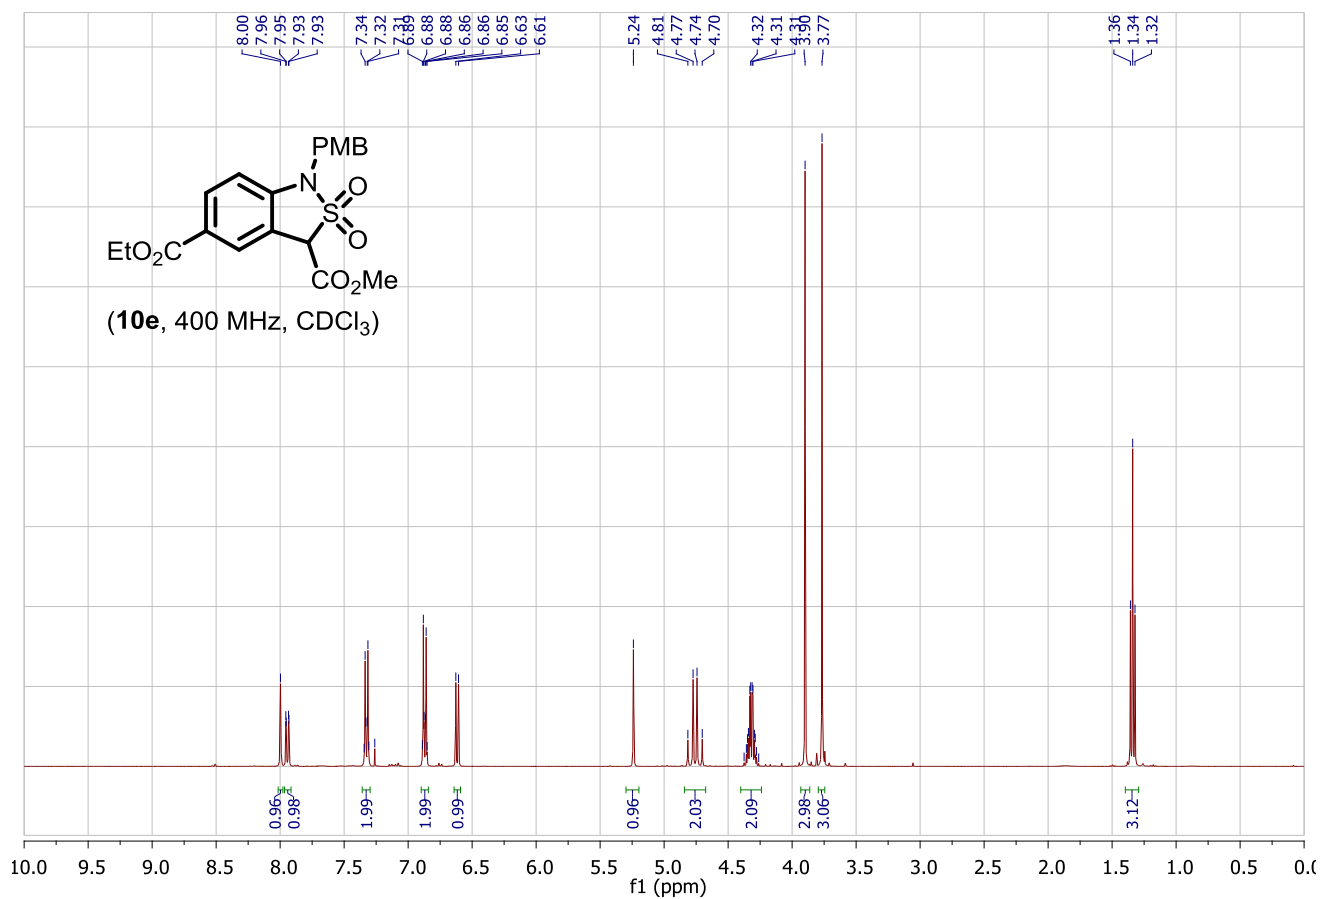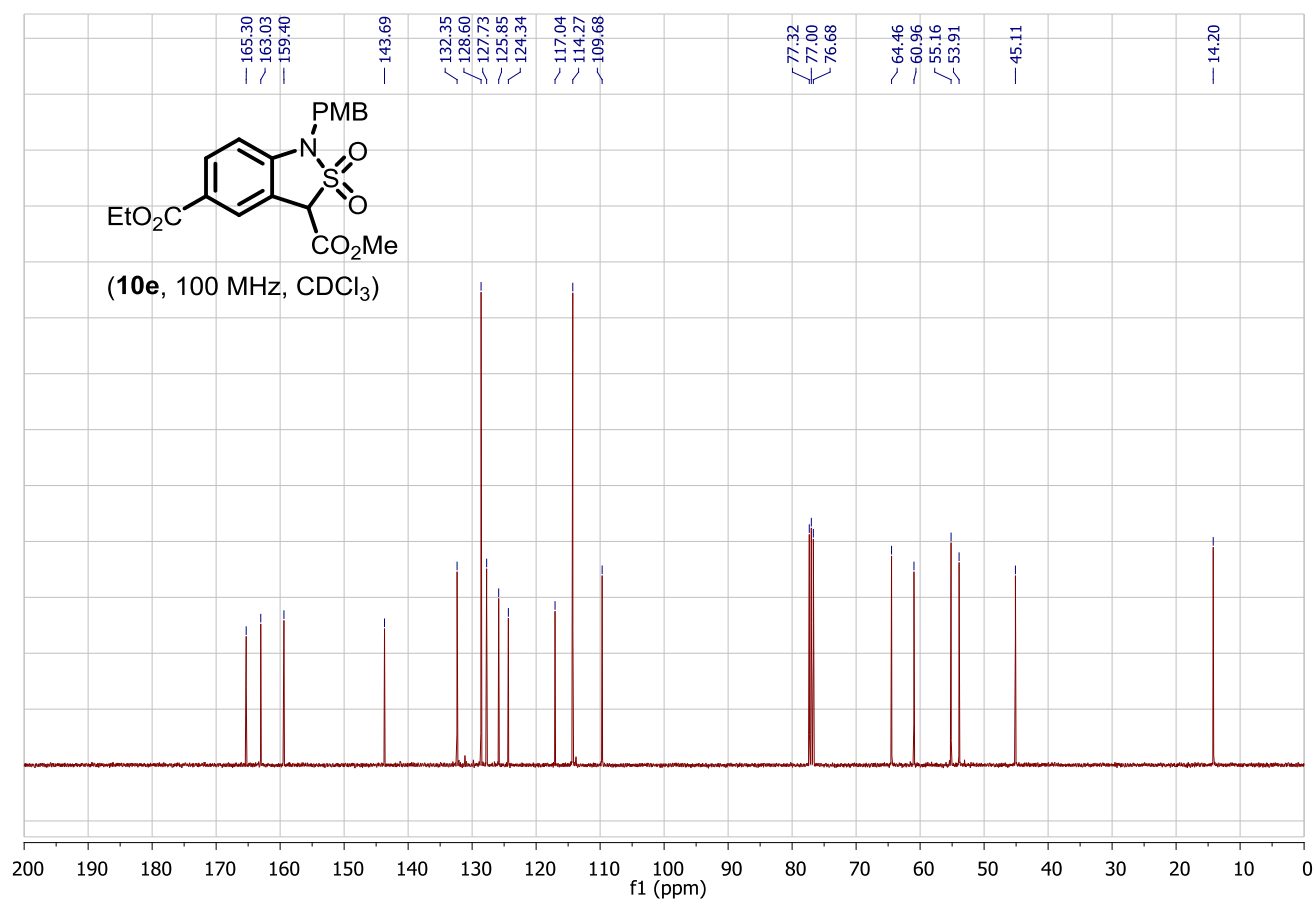

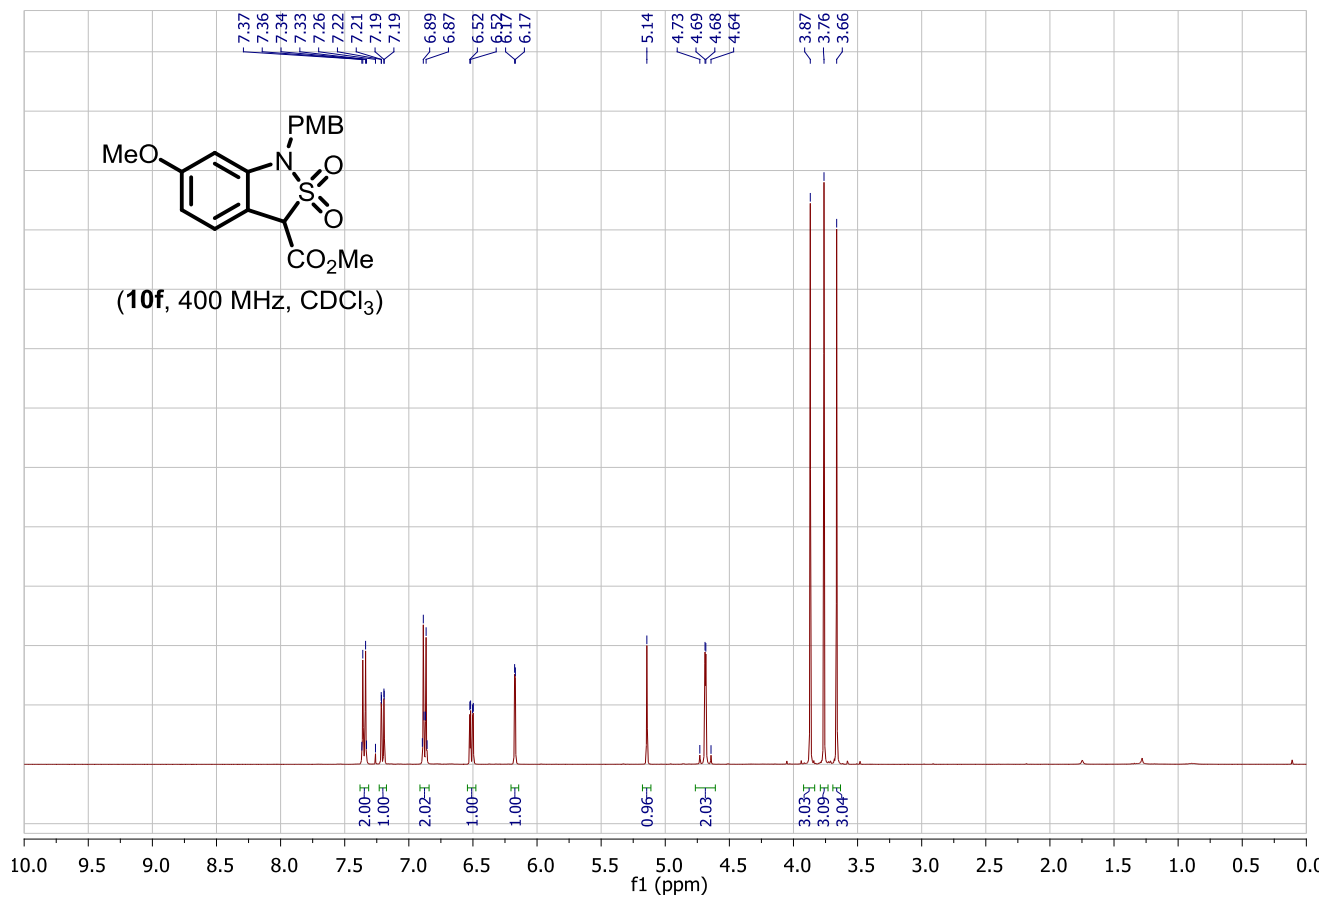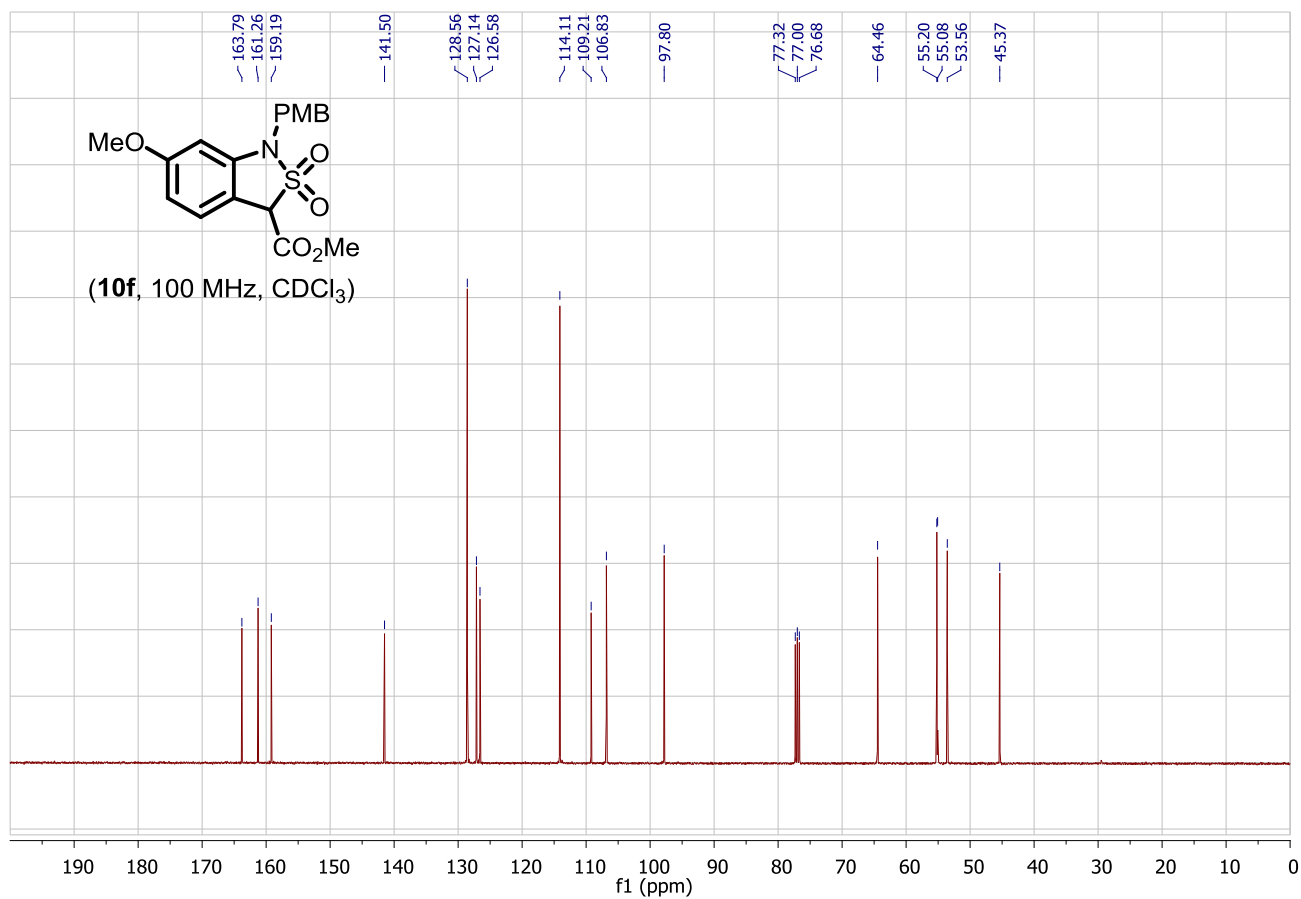

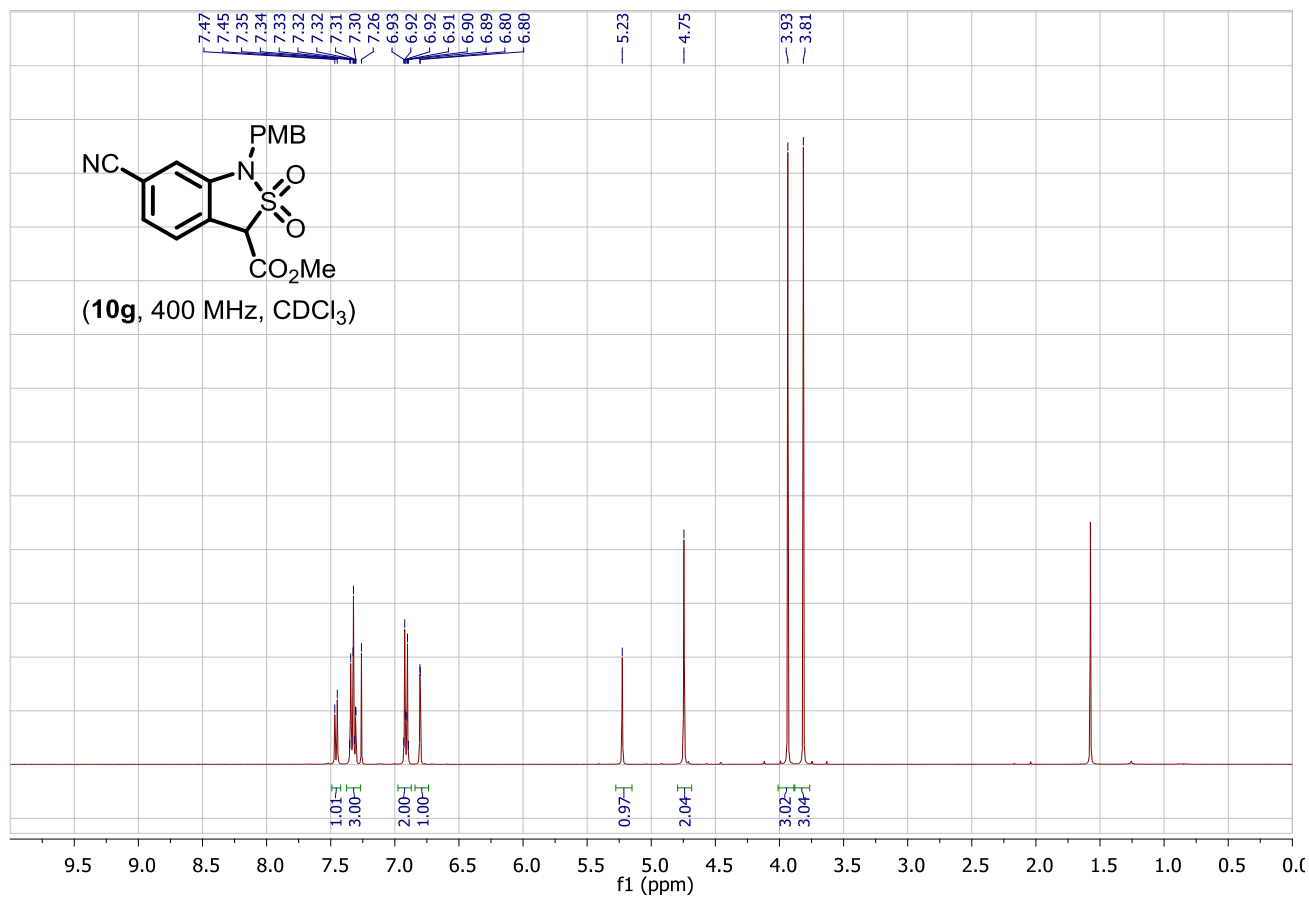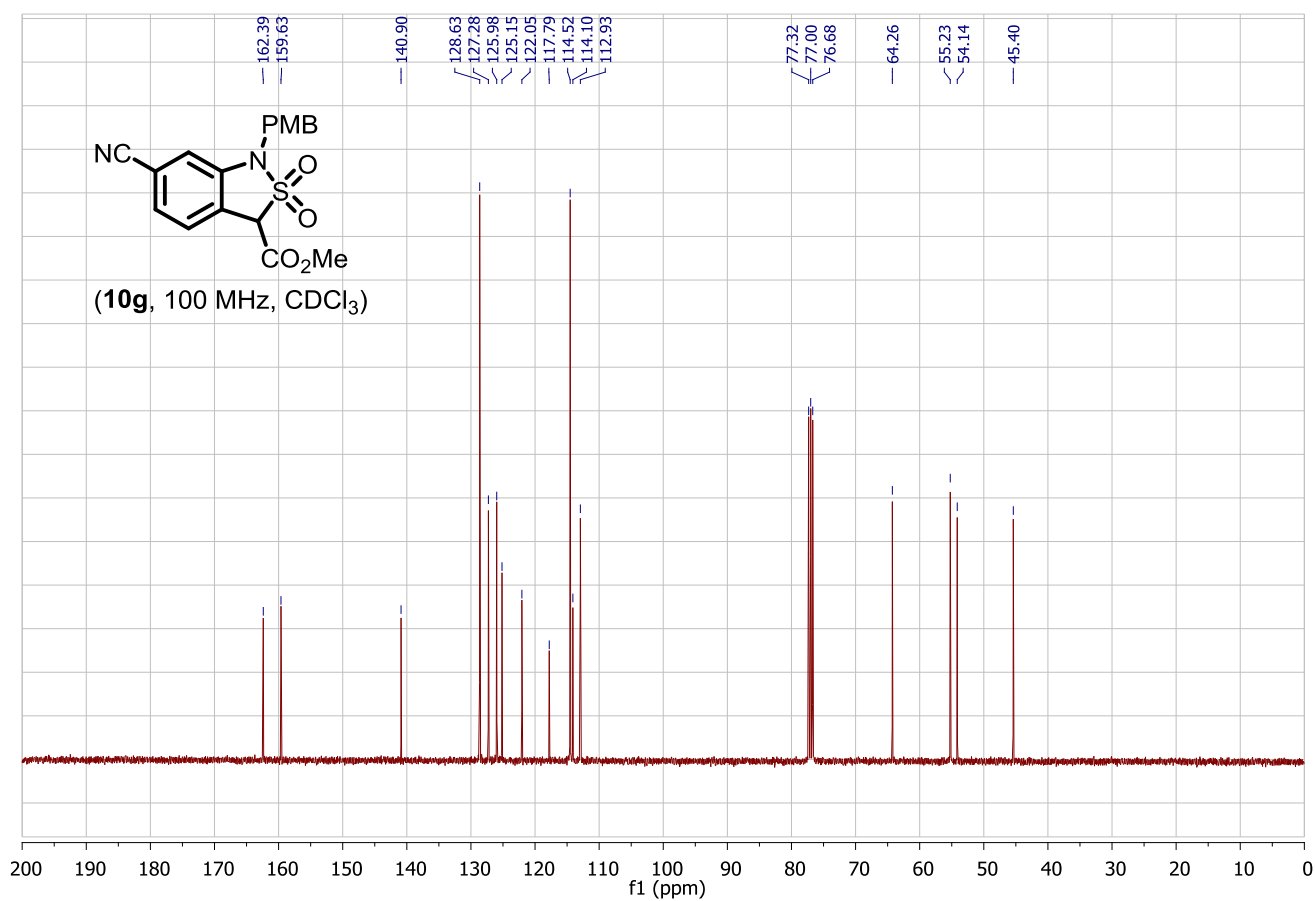

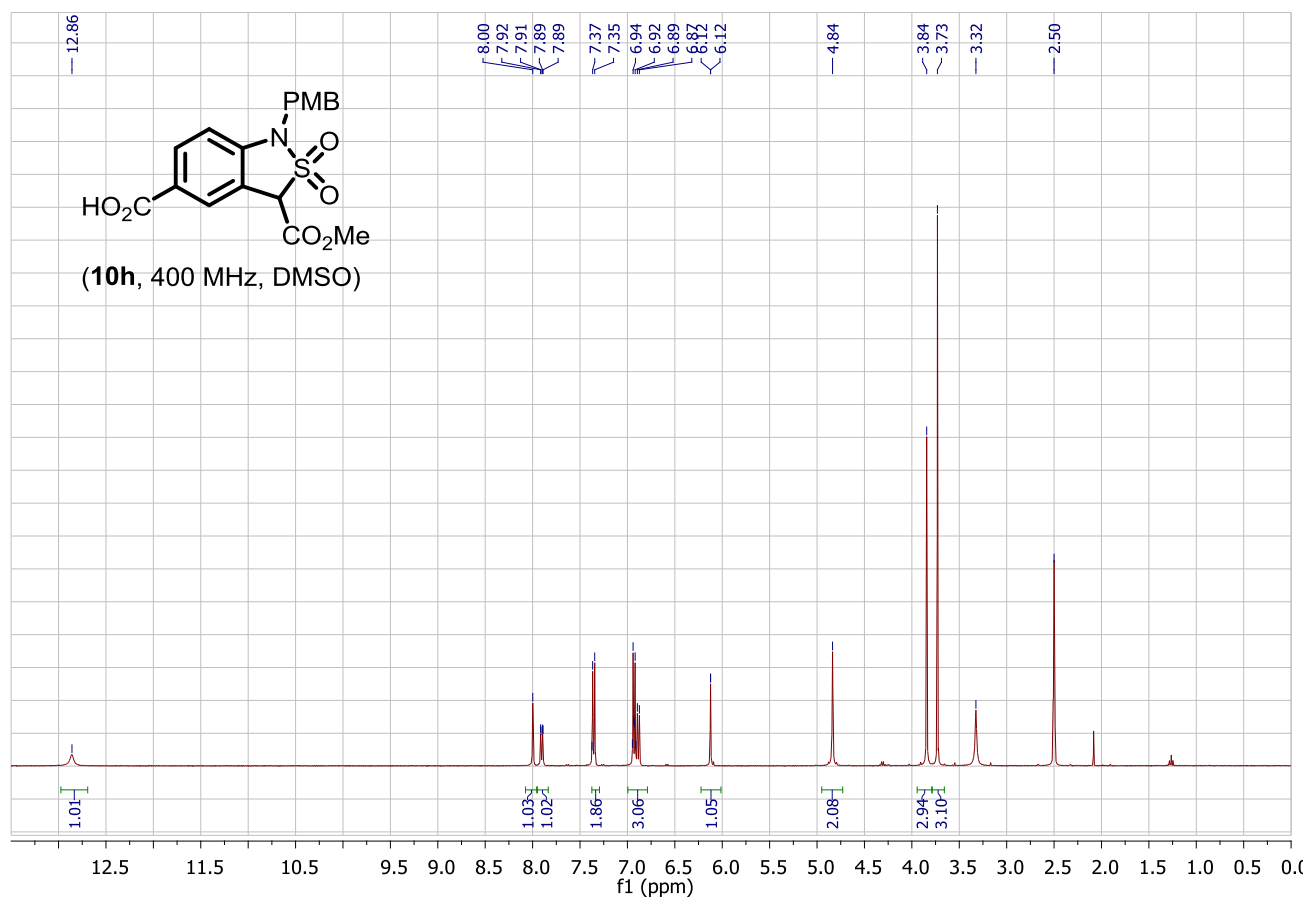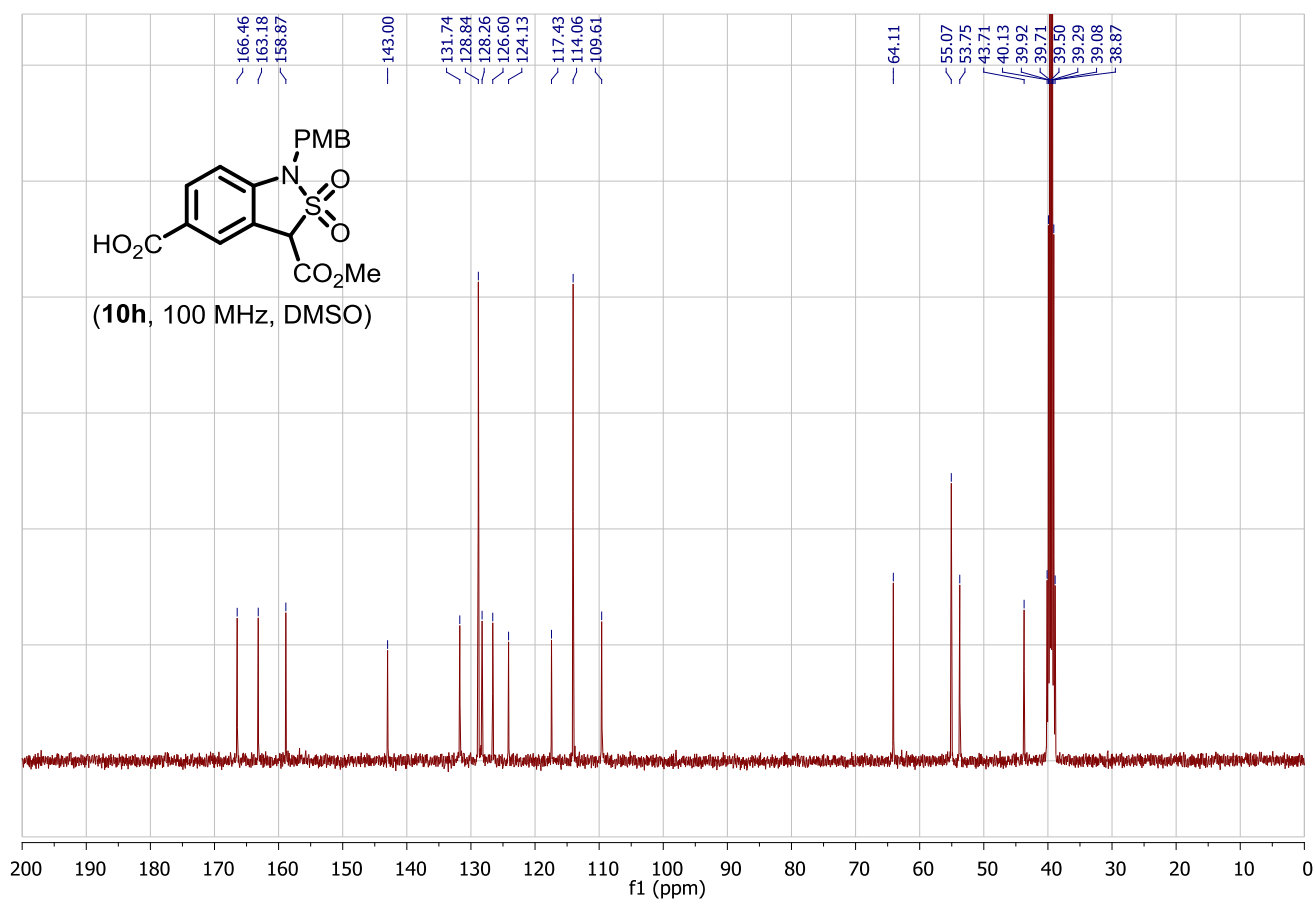



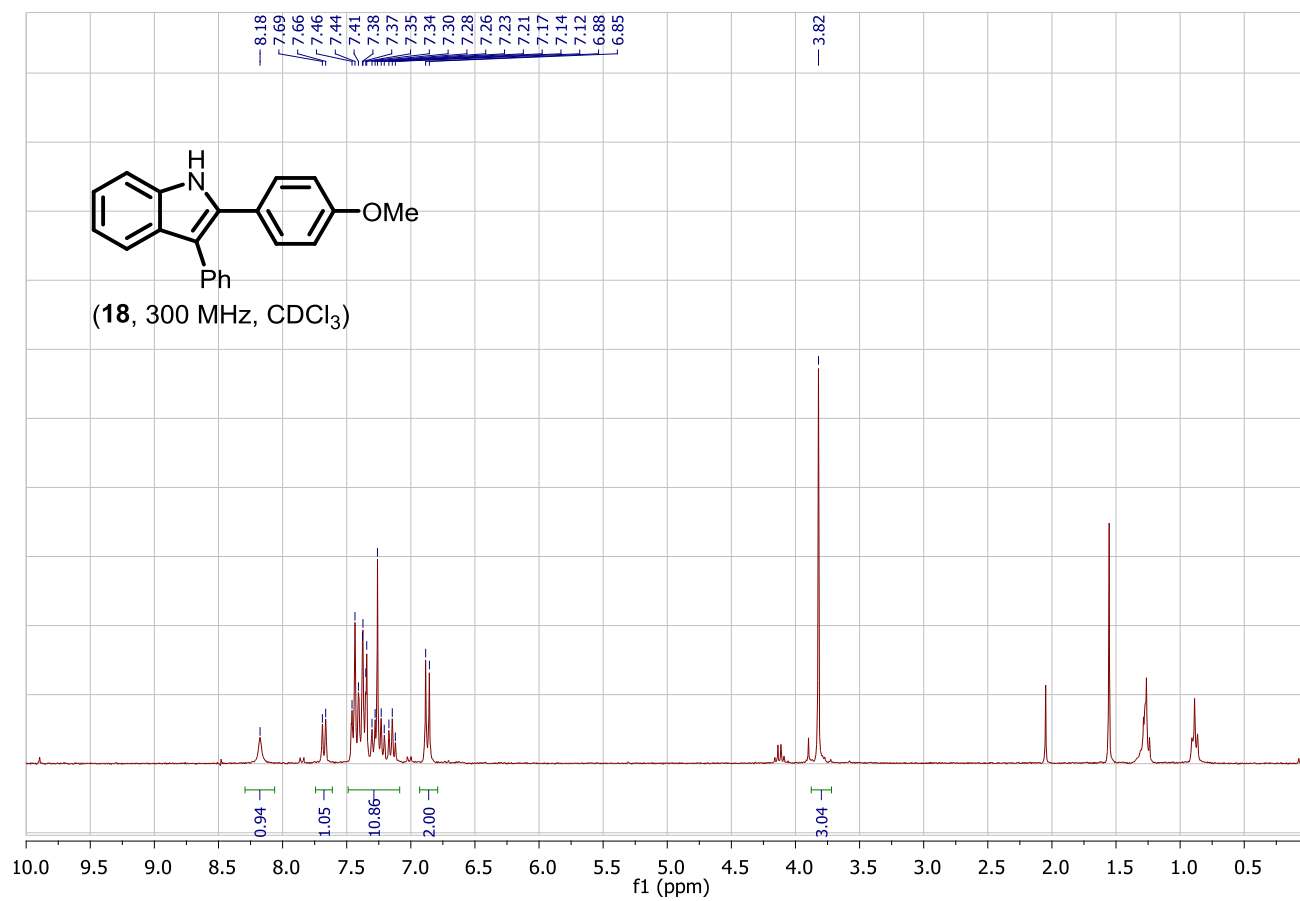

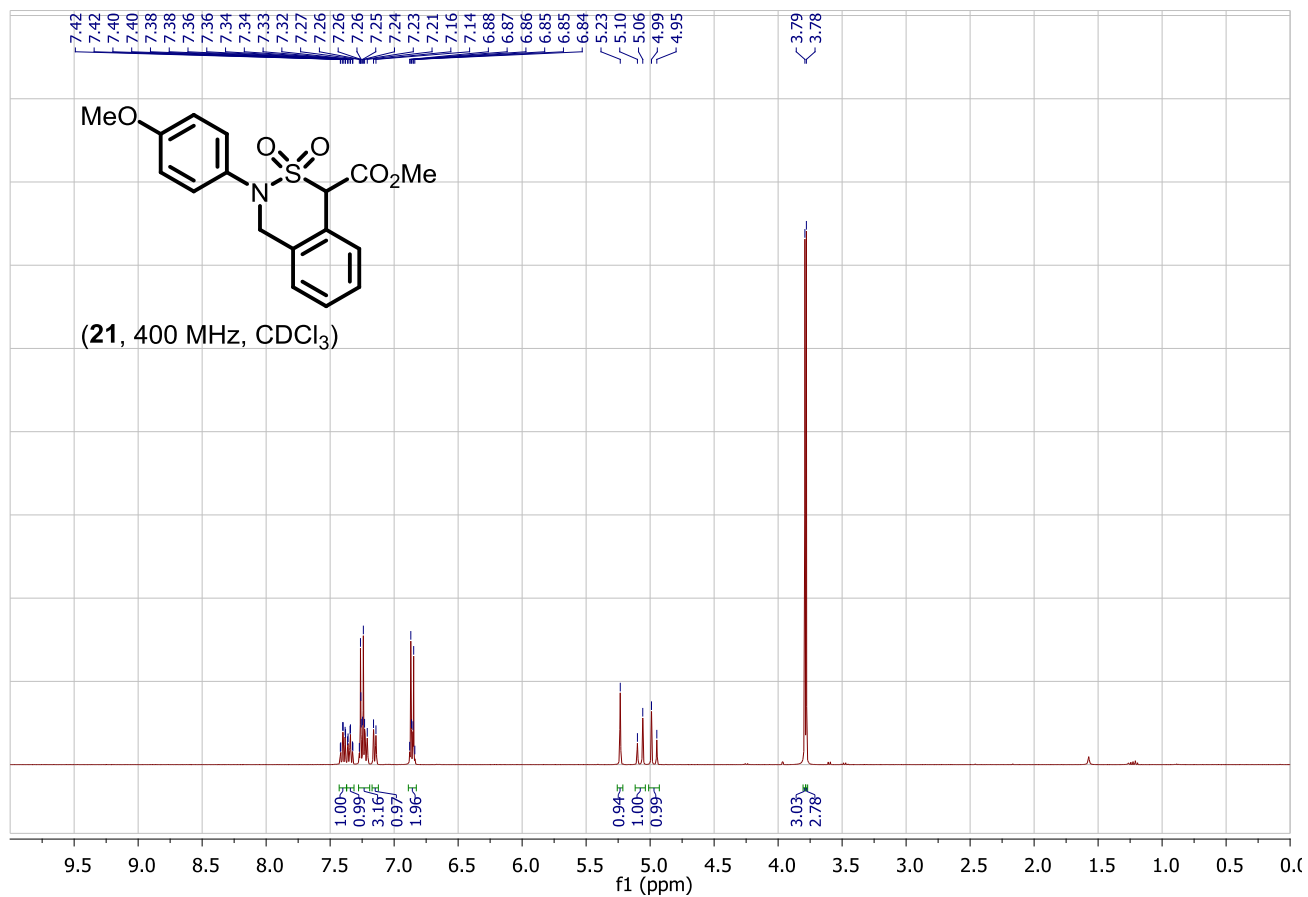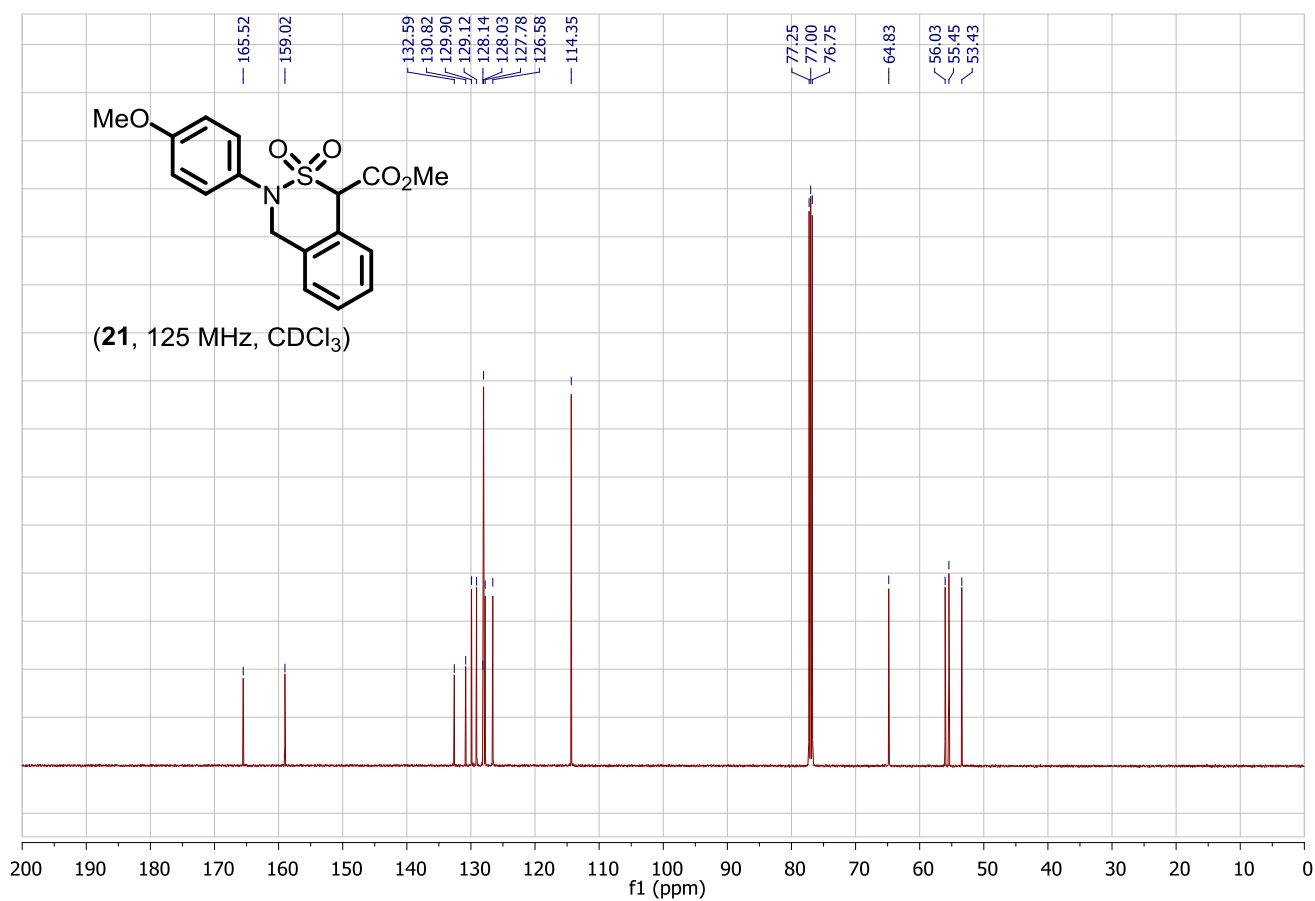

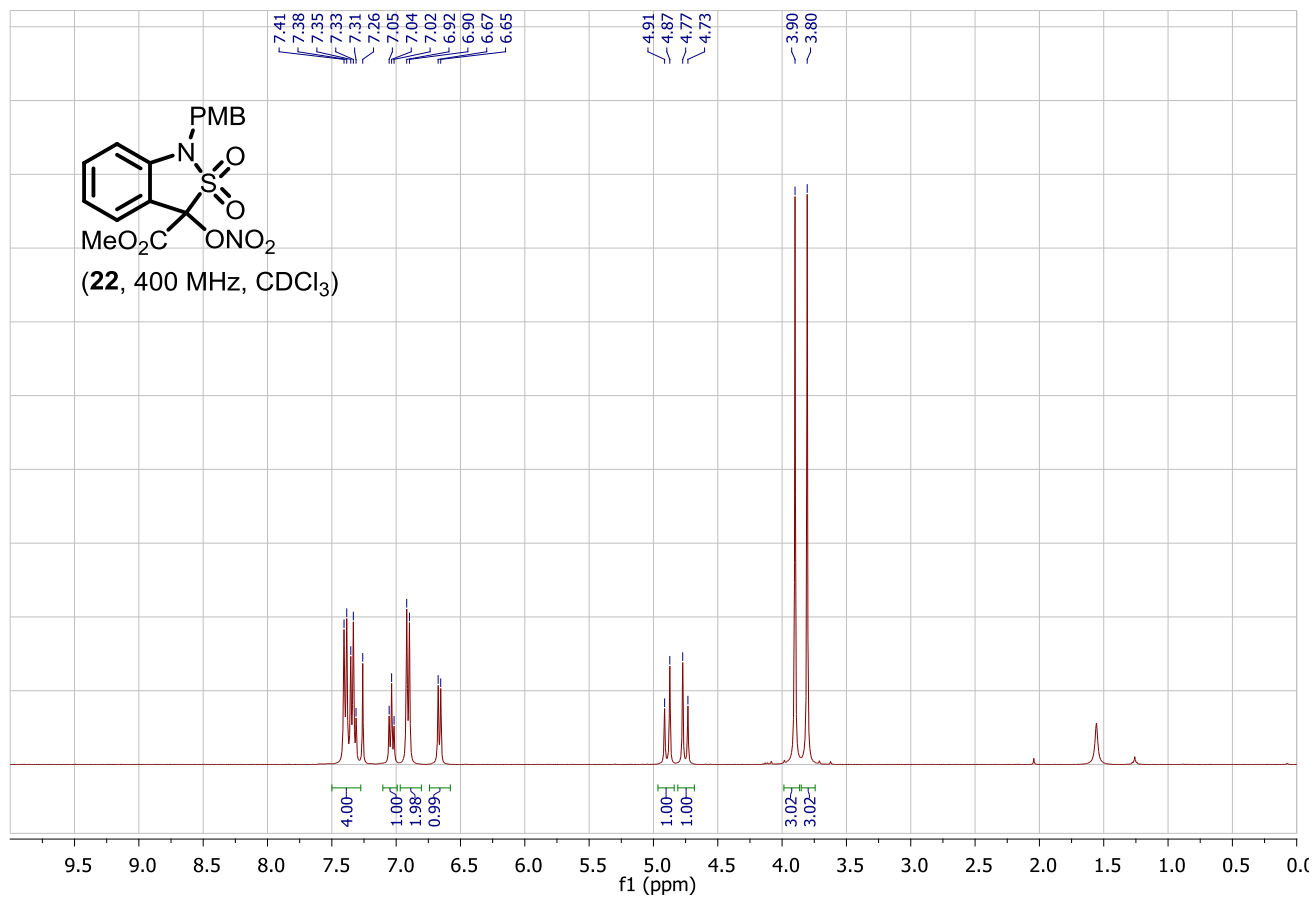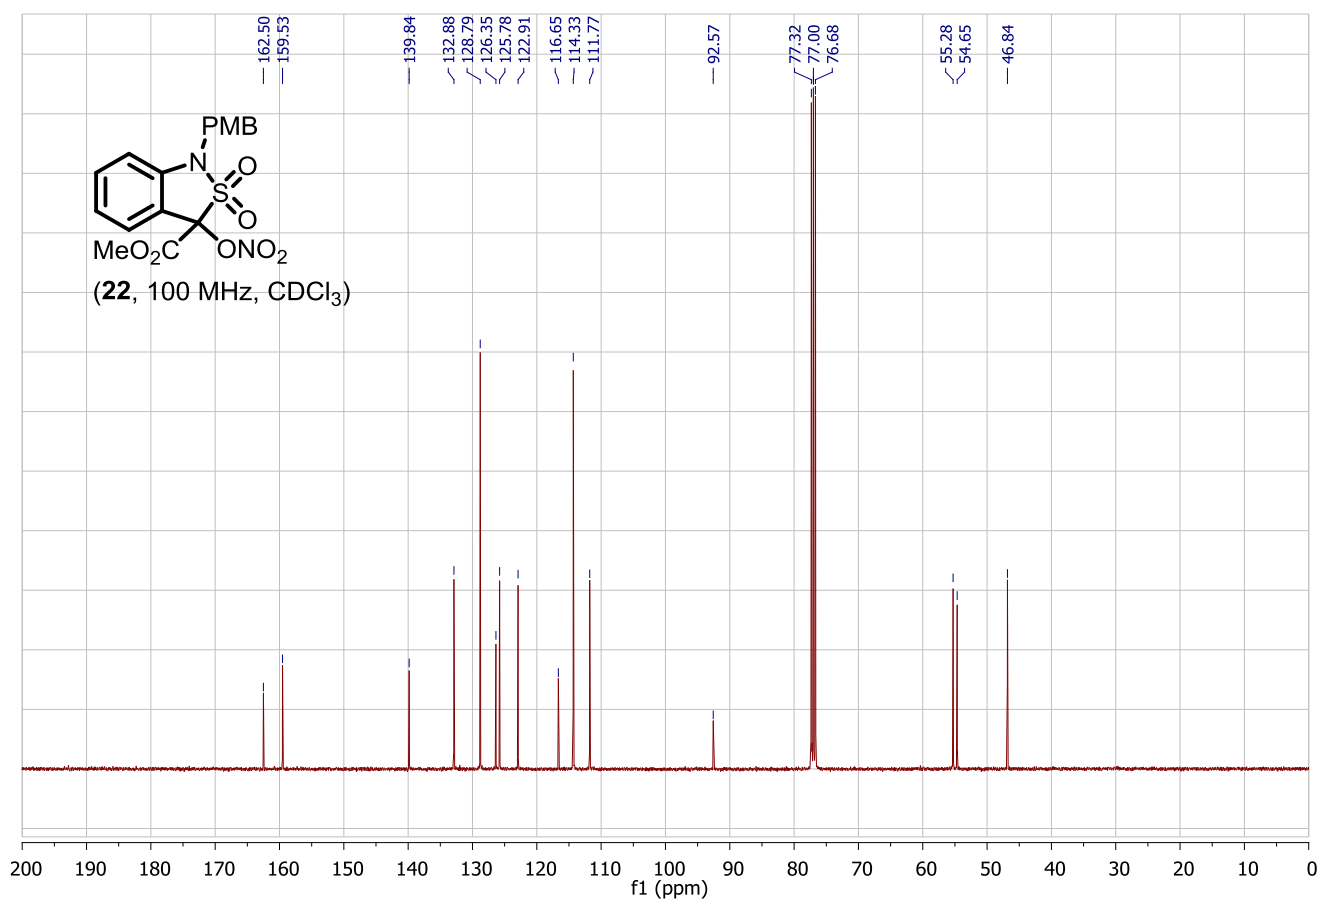

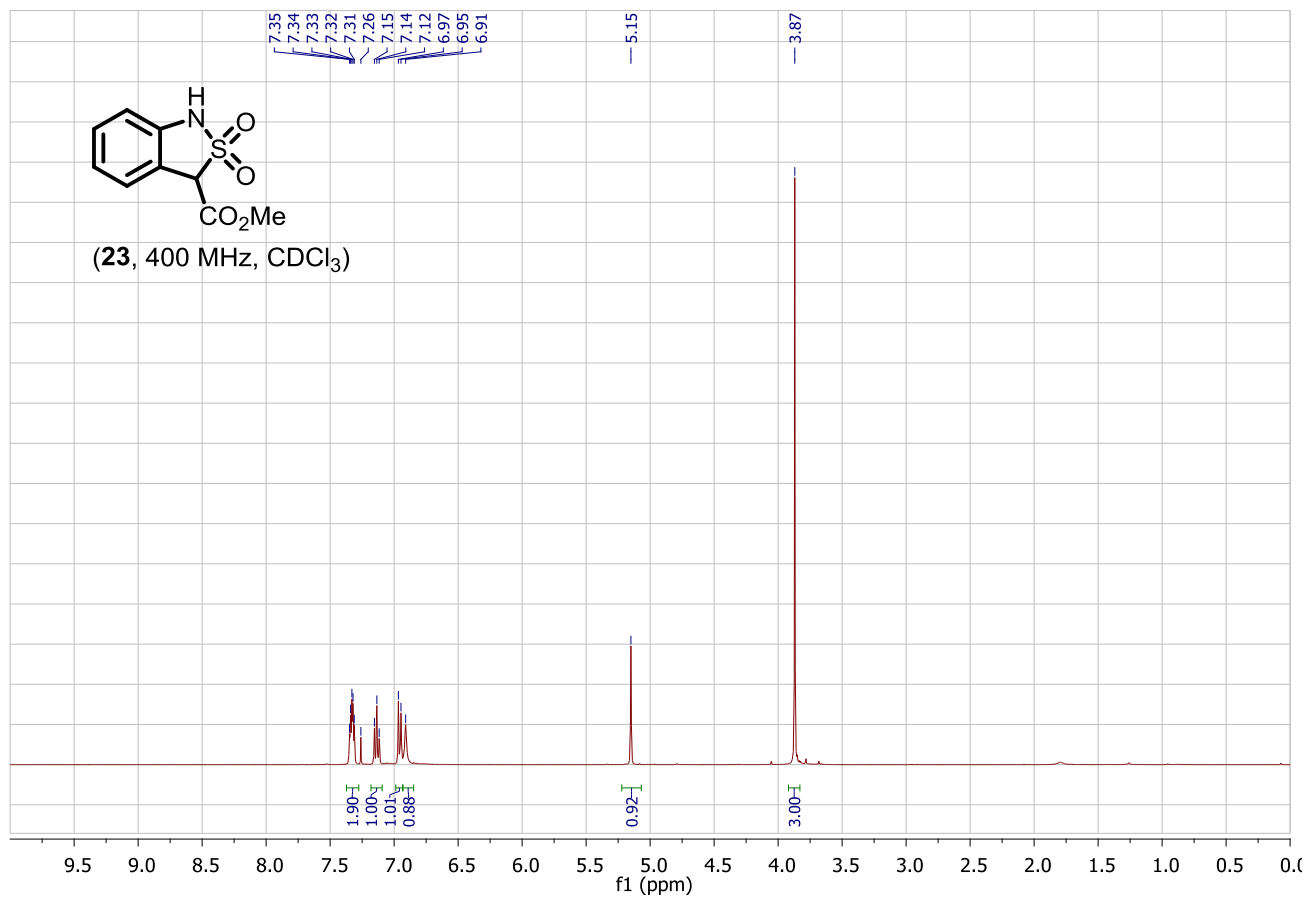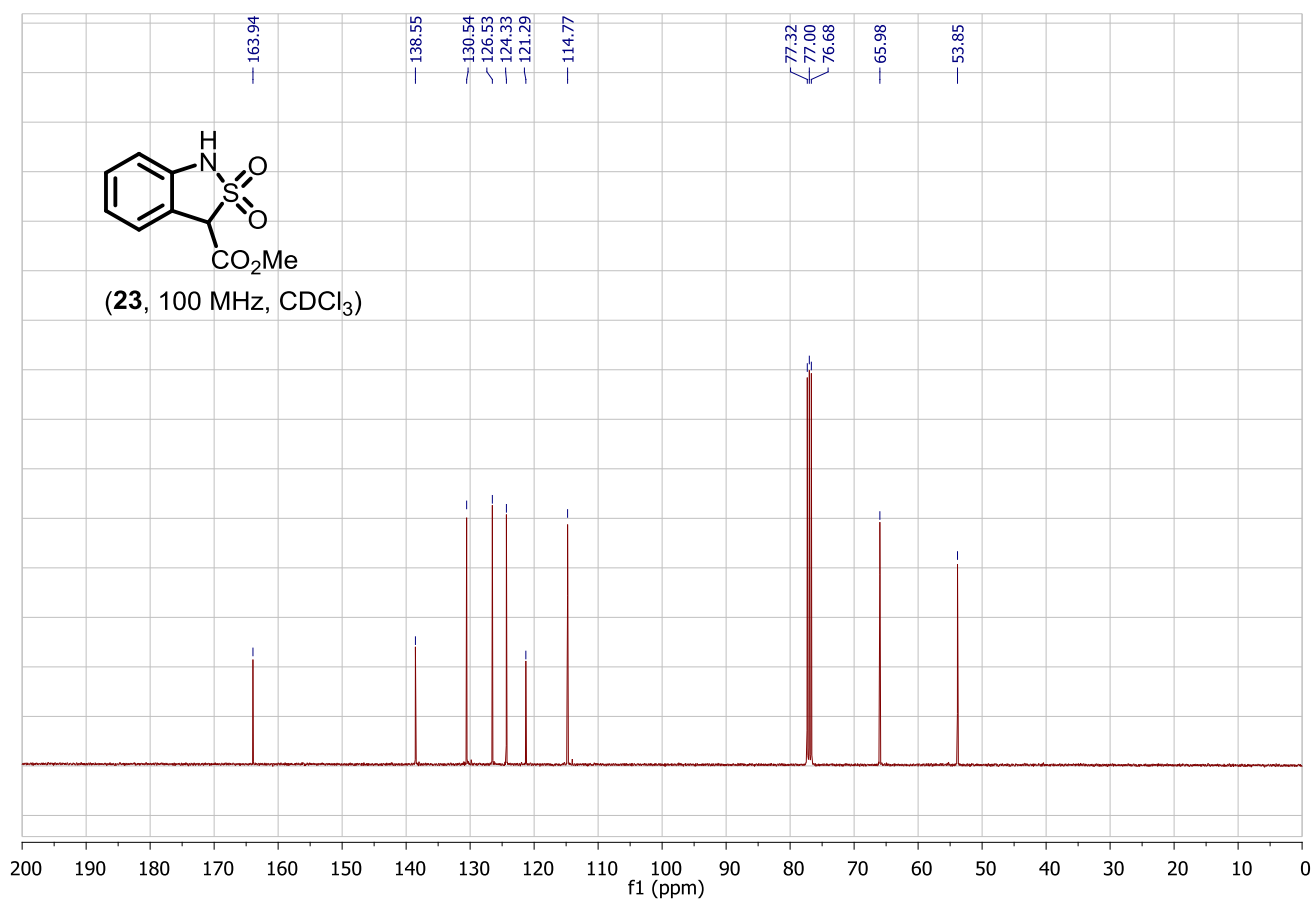

## 4 X-ray crystallographic data

### 4.1. Structure analysis of crystal of methyl 5-chloro-1-(4-methoxybenzyl)-1,3-dihydrobenzo[c]isothiazole-3-carboxylate-2,2-dioxide (**10c**)

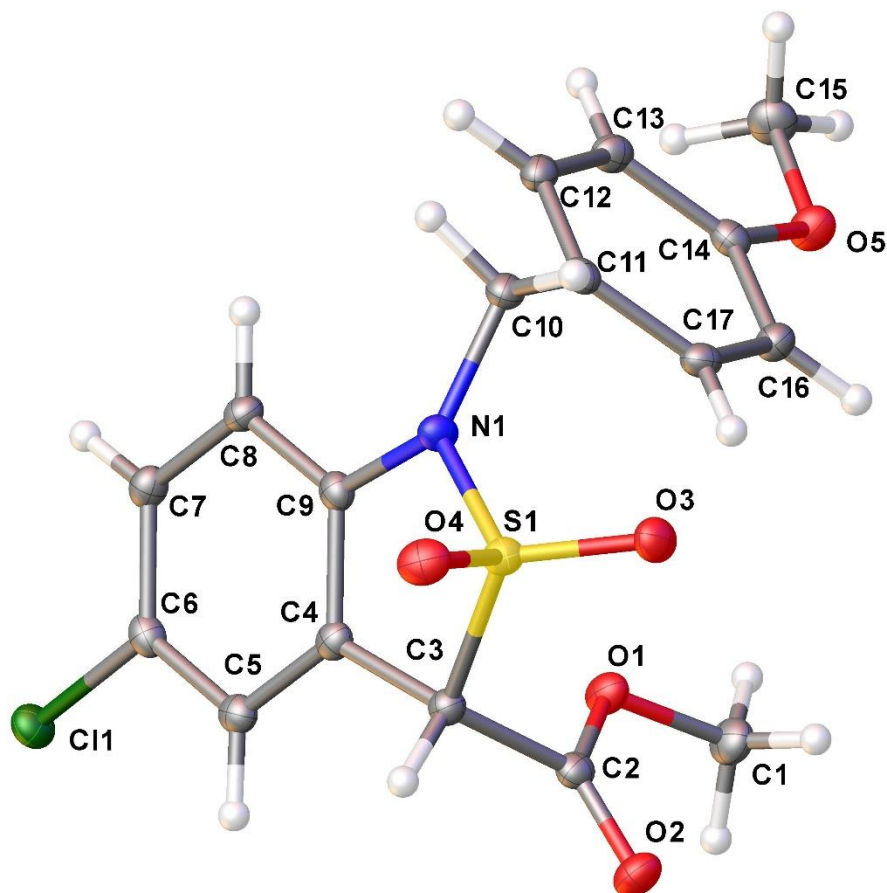

CCDC: 1520988

|                                       |                                                     |
|---------------------------------------|-----------------------------------------------------|
| Empirical formula                     | C <sub>17</sub> H <sub>16</sub> ClNO <sub>5</sub> S |
| Formula weight                        | 381.82                                              |
| Temperature/K                         | 100.01(10)                                          |
| Crystal system                        | triclinic                                           |
| Space group                           | P-1                                                 |
| a/Å                                   | 9.1882(6)                                           |
| b/Å                                   | 9.7653(6)                                           |
| c/Å                                   | 11.2245(5)                                          |
| $\alpha/^\circ$                       | 67.539(5)                                           |
| $\beta/^\circ$                        | 75.412(5)                                           |
| $\gamma/^\circ$                       | 64.377(6)                                           |
| Volume/Å <sup>3</sup>                 | 834.64(10)                                          |
| Z                                     | 2                                                   |
| $\rho_{\text{calc}}/\text{g cm}^{-3}$ | 1.519                                               |
| $\mu/\text{mm}^{-1}$                  | 3.461                                               |
| F(000)                                | 396.0                                               |

|                                             |                                                               |
|---------------------------------------------|---------------------------------------------------------------|
| Crystal size/mm <sup>3</sup>                | 0.2 × 0.2 × 0.15                                              |
| Radiation                                   | CuKα (λ = 1.54184)                                            |
| 2θ range for data collection/°              | 8.57 to 152.65                                                |
| Index ranges                                | -11 ≤ h ≤ 11, -12 ≤ k ≤ 12, -12 ≤ l ≤ 14                      |
| Reflections collected                       | 9802                                                          |
| Independent reflections                     | 3483 [R <sub>int</sub> = 0.0305, R <sub>sigma</sub> = 0.0319] |
| Data/restraints/parameters                  | 3483/0/228                                                    |
| Goodness-of-fit on F <sup>2</sup>           | 1.050                                                         |
| Final R indexes [I ≥ 2σ (I)]                | R <sub>1</sub> = 0.0324, wR <sub>2</sub> = 0.0815             |
| Final R indexes [all data]                  | R <sub>1</sub> = 0.0380, wR <sub>2</sub> = 0.0858             |
| Largest diff. peak/hole / e Å <sup>-3</sup> | 0.36/-0.37                                                    |

4.2. Structure analysis of crystal of methyl 1-(4-methoxybenzyl)-3-(nitrooxy)-1,3-dihydrobenzo[*c*]isothiazole-3-carboxylate-2,2-dioxide (22)

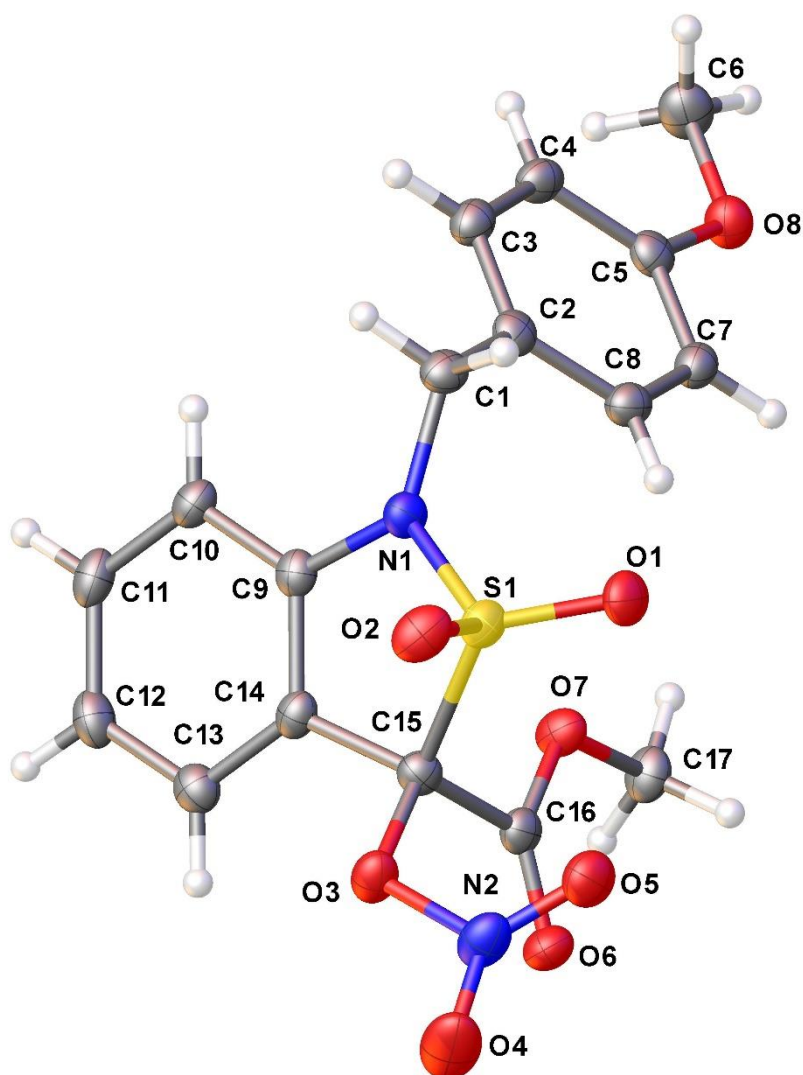

CCDC: 1520989

|                                       |                                                                 |
|---------------------------------------|-----------------------------------------------------------------|
| Empirical formula                     | C <sub>17</sub> H <sub>16</sub> N <sub>2</sub> O <sub>8</sub> S |
| Formula weight                        | 408.38                                                          |
| Temperature/K                         | 99.99(10)                                                       |
| Crystal system                        | triclinic                                                       |
| Space group                           | P-1                                                             |
| a/Å                                   | 9.0077(5)                                                       |
| b/Å                                   | 10.7469(5)                                                      |
| c/Å                                   | 11.1011(4)                                                      |
| $\alpha$ /°                           | 106.476(4)                                                      |
| $\beta$ /°                            | 102.298(4)                                                      |
| $\gamma$ /°                           | 114.630(5)                                                      |
| Volume/Å <sup>3</sup>                 | 866.51(8)                                                       |
| Z                                     | 2                                                               |
| $\rho_{\text{calc}}$ /cm <sup>3</sup> | 1.565                                                           |

|                                                |                                                               |
|------------------------------------------------|---------------------------------------------------------------|
| $\mu/\text{mm}^{-1}$                           | 2.143                                                         |
| F(000)                                         | 424.0                                                         |
| Crystal size/ $\text{mm}^3$                    | $0.1 \times 0.09 \times 0.06$                                 |
| Radiation                                      | $\text{CuK}\alpha$ ( $\lambda = 1.54184$ )                    |
| $2\Theta$ range for data collection/ $^\circ$  | 8.98 to 153.206                                               |
| Index ranges                                   | $-11 \leq h \leq 11, -13 \leq k \leq 13, -13 \leq l \leq 13$  |
| Reflections collected                          | 18962                                                         |
| Independent reflections                        | 3615 [ $R_{\text{int}} = 0.0623, R_{\text{sigma}} = 0.0310$ ] |
| Data/restraints/parameters                     | 3615/0/255                                                    |
| Goodness-of-fit on $F^2$                       | 1.047                                                         |
| Final R indexes [ $I \geq 2\sigma(I)$ ]        | $R_1 = 0.0407, wR_2 = 0.1092$                                 |
| Final R indexes [all data]                     | $R_1 = 0.0451, wR_2 = 0.1135$                                 |
| Largest diff. peak/hole / $e \text{ \AA}^{-3}$ | 0.41/-0.48                                                    |
